# Supplementary material for: The utility of endotracheal aspirate bacteriology in identifying mechanically ventilated patients at risk for ventilator associated pneumonia: a single-center prospective observational study
Source: Springer Nature journal article supplement (doi:10.1186/s12879-019-4367-7), 2019-08-29
Supplement: MOESM3 [file 17117016]

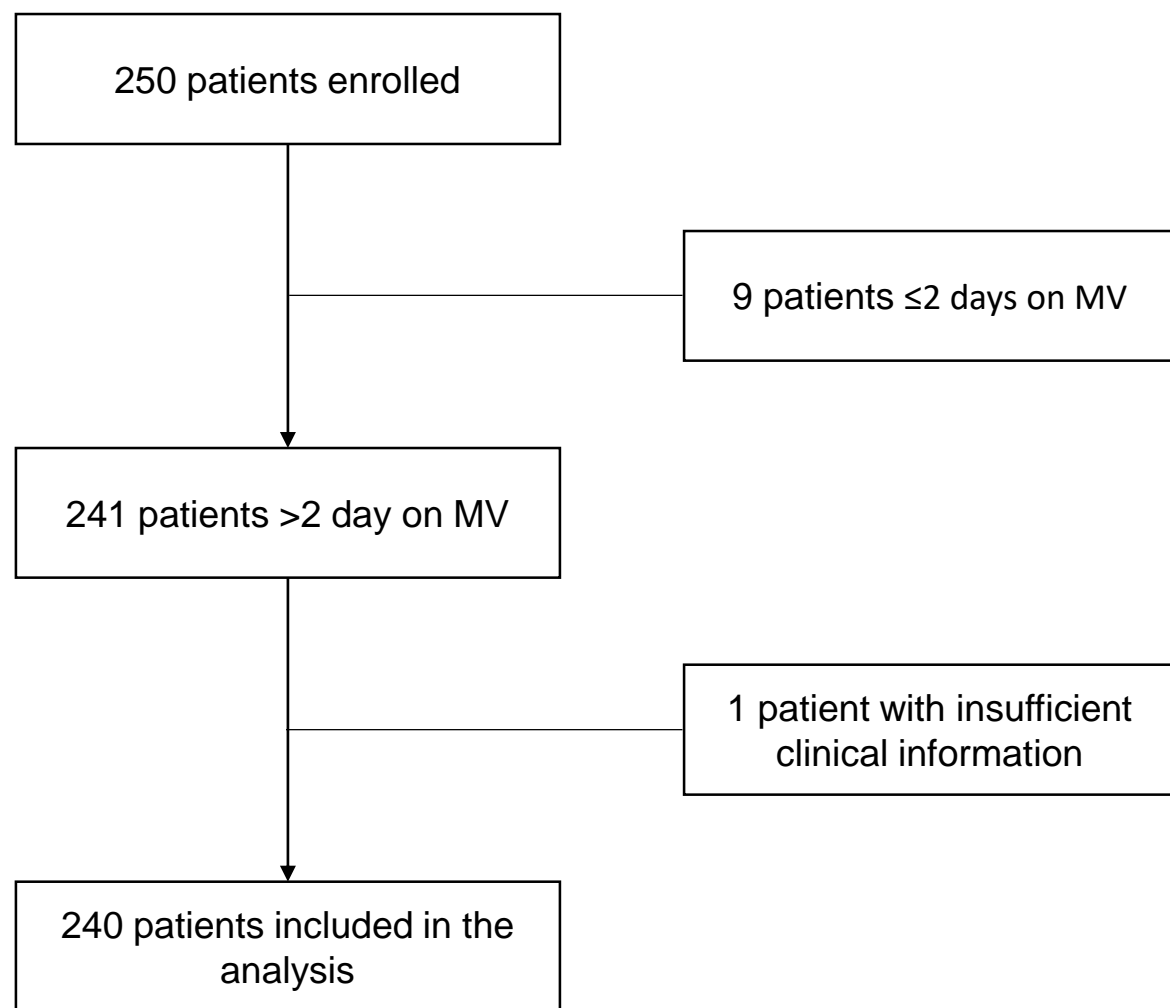

**Figure S1. Disposition of the patients included in the analysis.**
