# Supplementary material for: The utility of endotracheal aspirate bacteriology in identifying mechanically ventilated patients at risk for ventilator associated pneumonia: a single-center prospective observational study
Source: Springer Nature journal article supplement (doi:10.1186/s12879-019-4367-7), 2019-08-29
Supplement: MOESM5 [file 17117016]

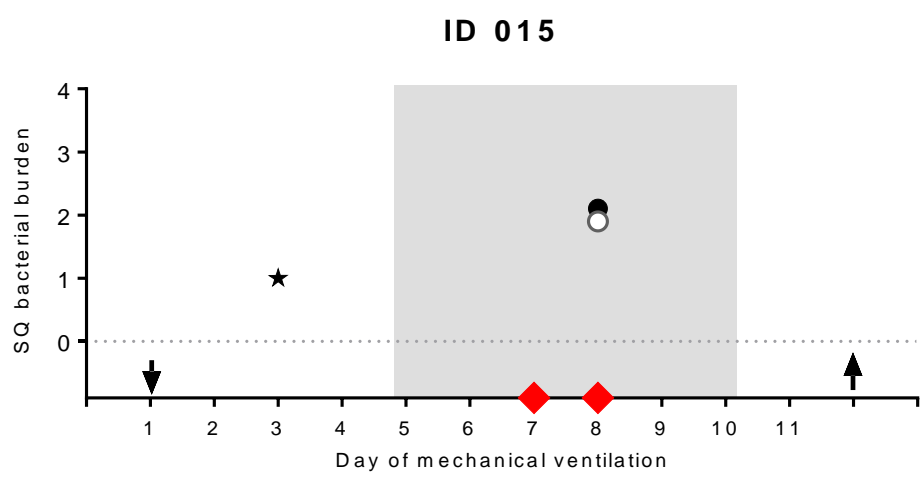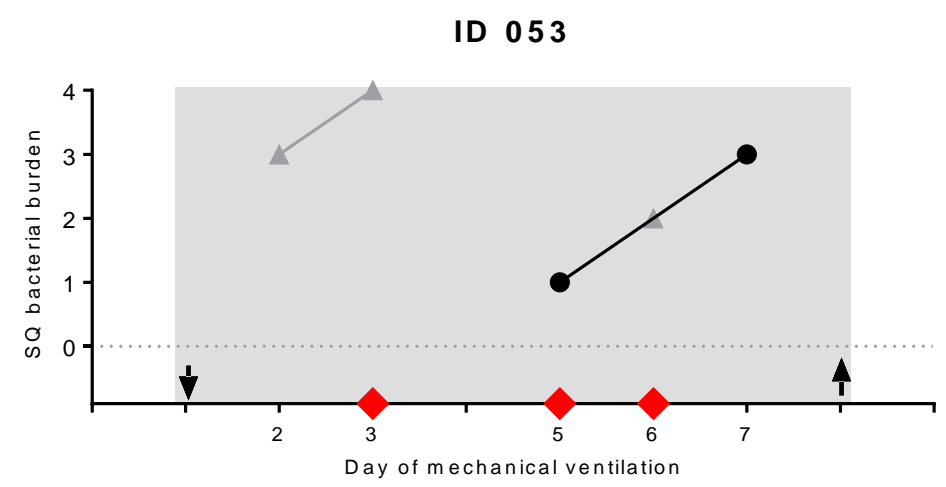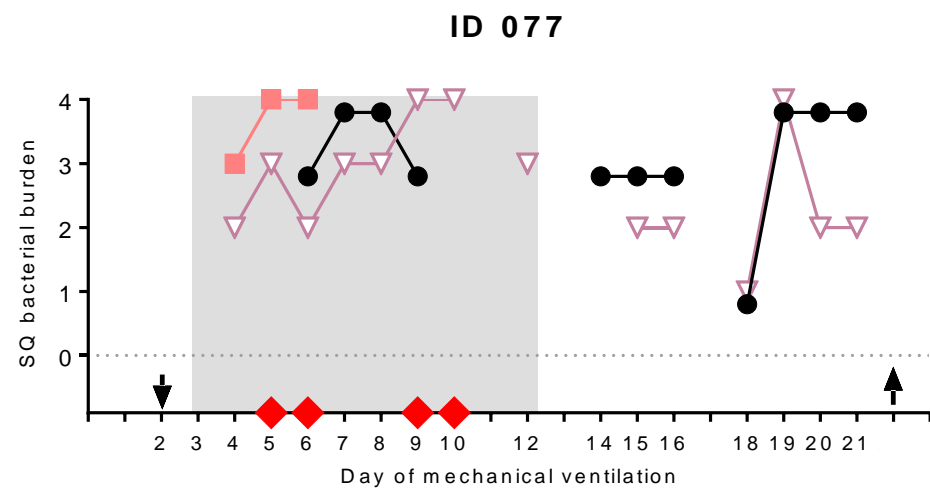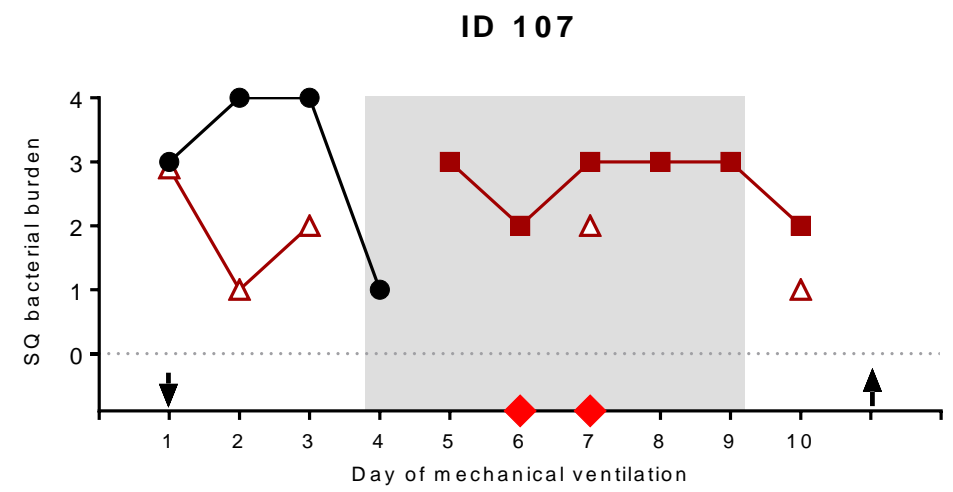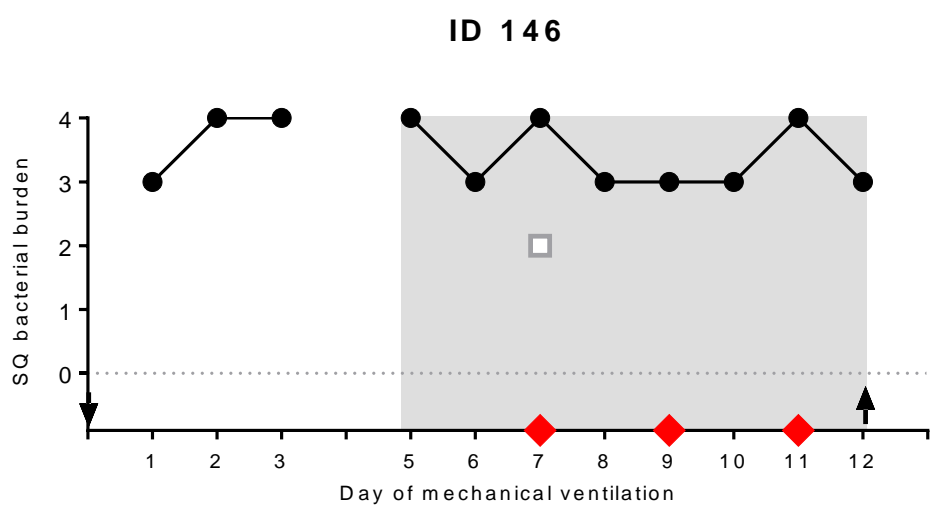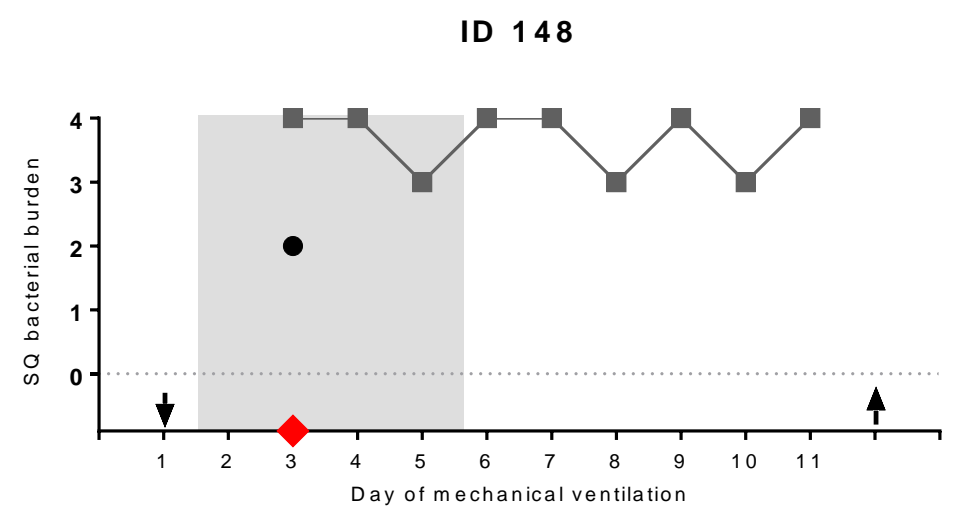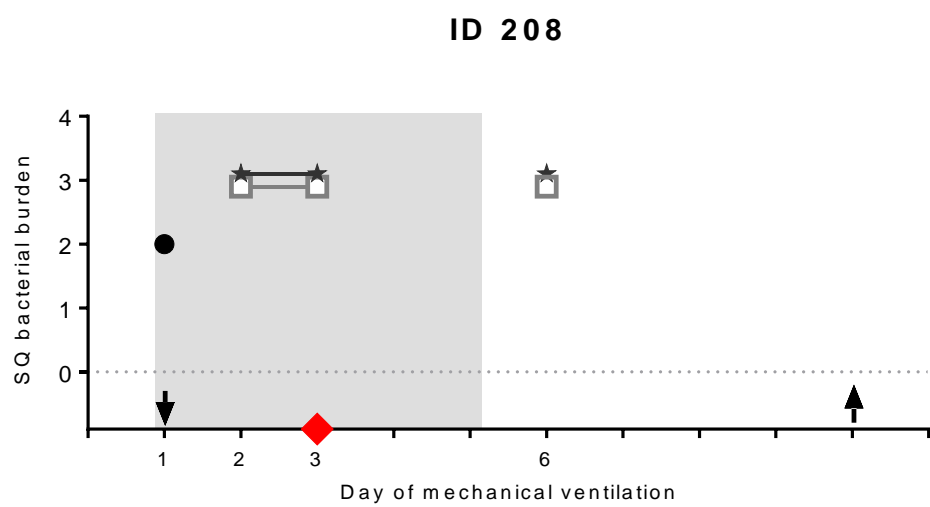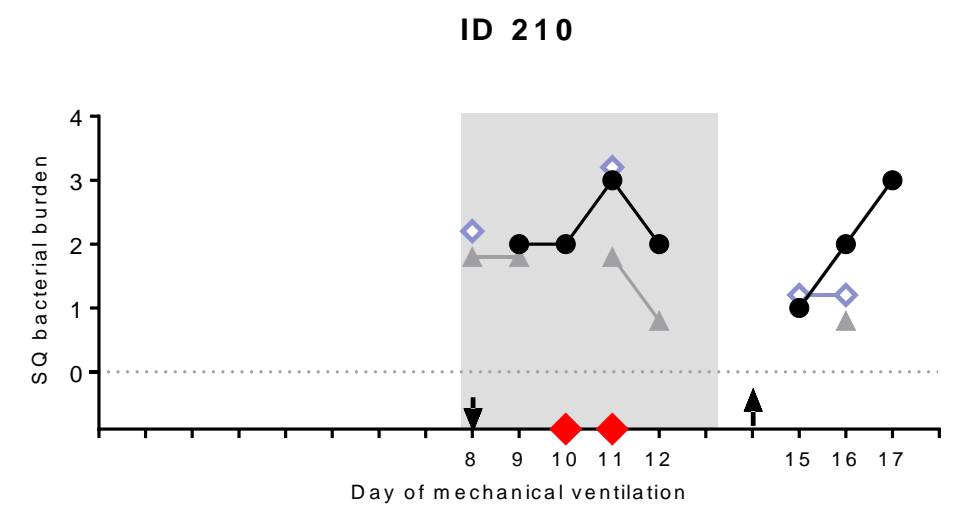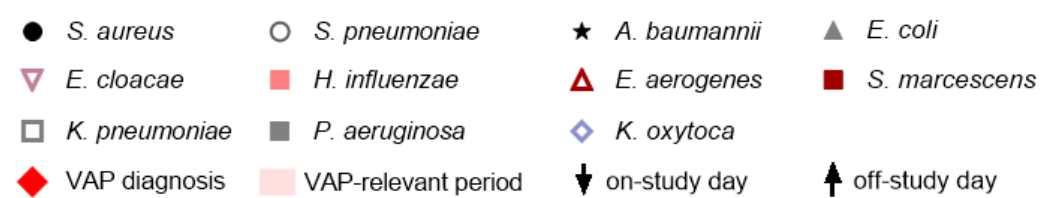

**Figure S3. Patients with *S. aureus* mixed infection VAP episodes.** *S. aureus* and other pathogens are indicated as SQ-ETA readout and VAP clinical diagnosis days with VAP-relevant period highlighted. Only those days when ETA was obtained and analyzed are shown on X-axis.
