# Supplementary material for: The utility of endotracheal aspirate bacteriology in identifying mechanically ventilated patients at risk for ventilator associated pneumonia: a single-center prospective observational study
Source: Springer Nature journal article supplement (doi:10.1186/s12879-019-4367-7), 2019-08-29
Supplement: MOESM6 [file 17117016]

A

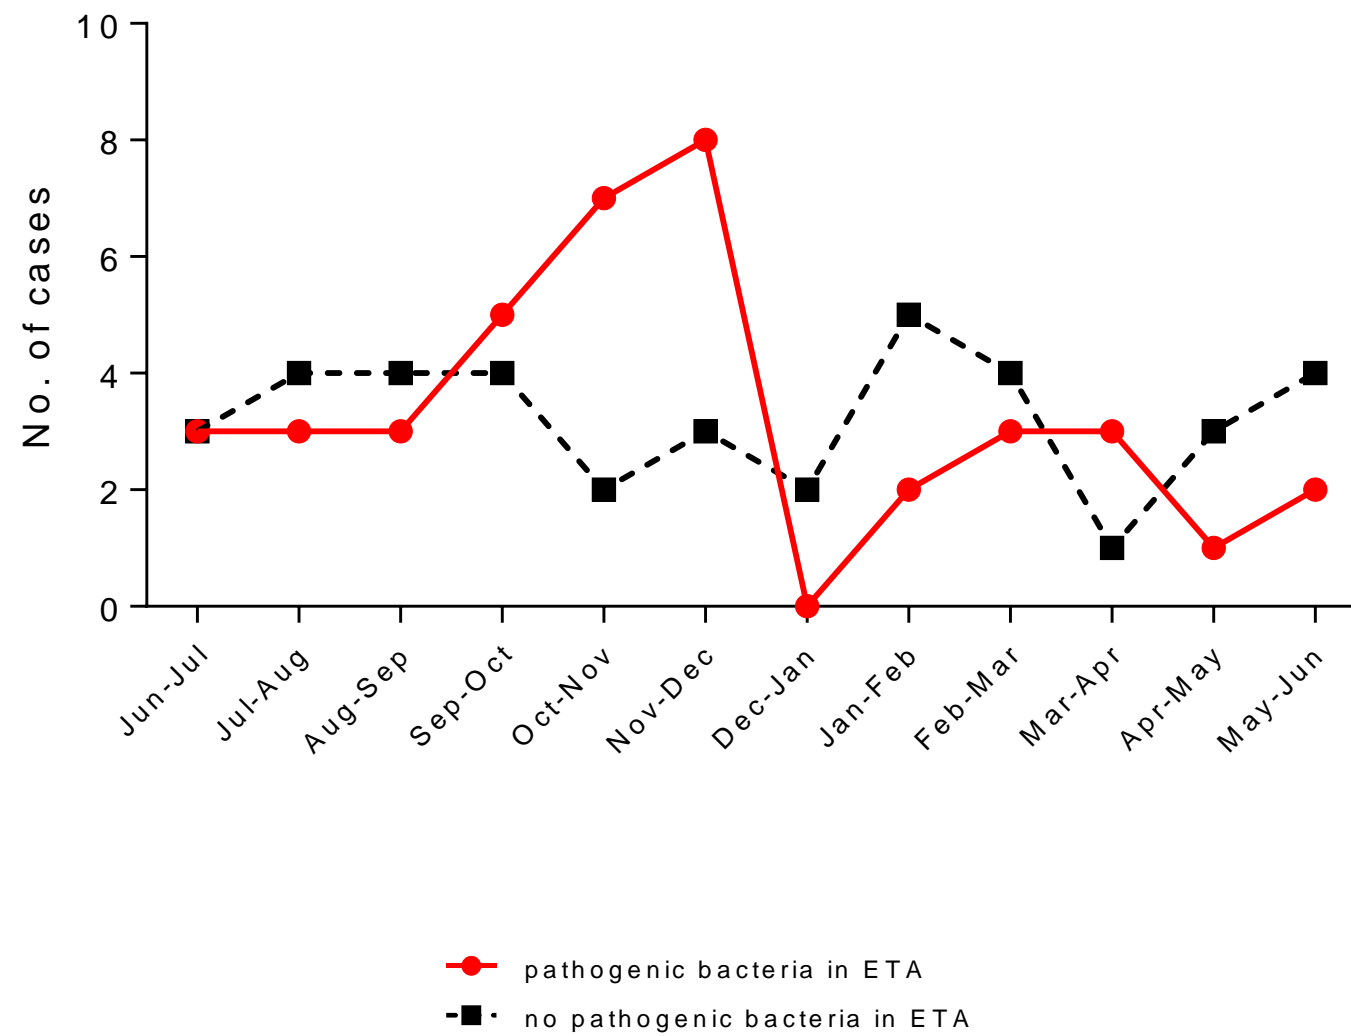

B

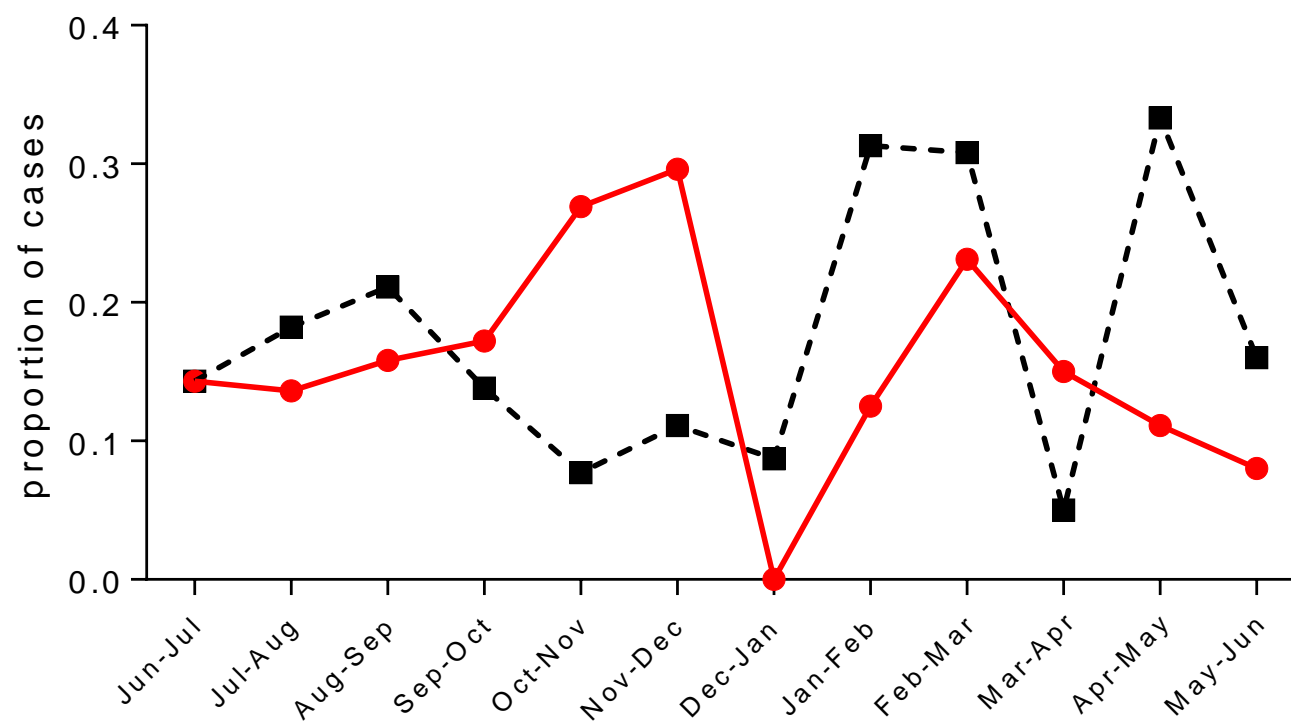

**Figure S4. Temporal distribution of VAP cases during the study period. A:** Number of cases detected shown against corresponding time period. **B:** Number of cases normalized against number of recruited patients in the corresponding time period. Study commenced in the middle of June 2014; therefore VAP cases were counted at intervals from 17<sup>th</sup> of the month 16<sup>th</sup> of the subsequent month. In the December-January period no bacterial VAP cases were observed, despite active recruitment of patients in the study.
