# Supplementary material for: The utility of endotracheal aspirate bacteriology in identifying mechanically ventilated patients at risk for ventilator associated pneumonia: a single-center prospective observational study
Source: Springer Nature journal article supplement (doi:10.1186/s12879-019-4367-7), 2019-08-29
Supplement: MOESM7 [file 17117016]

| ID | ICU Location | On Study Date | Off Study Date | Age Range | Hosp Admit Date | ICU Admit Date | Ventilation Start Date | Hosp Admit Dx                                                                              | PMH                                                                                                                      | Prior Hosp Admit  | Nursing home resident | Medication on Admission          | Medication last 90 days                 | ICU TX Disposition | Hosp DC Date | Hosp DC Disposition      | Off Study Reason             | ETOH | Current Smoker | Past Smoker | Emerg surgery | Trauma | Height inch | Weight lbs | BMI  |
|----|--------------|---------------|----------------|-----------|-----------------|----------------|------------------------|--------------------------------------------------------------------------------------------|--------------------------------------------------------------------------------------------------------------------------|-------------------|-----------------------|----------------------------------|-----------------------------------------|--------------------|--------------|--------------------------|------------------------------|------|----------------|-------------|---------------|--------|-------------|------------|------|
| 1  | ICU          | 6/17/14       | 6/20/14        | 81 - 90   | 6/17/14         | 6/17/14        | 6/17/14                | PNEUMONIA/SEPSIS                                                                           | Hypertension<br>DM<br>Asthma<br>CHF<br>Dyslipidemia<br>Atrial Fibrillation<br>Gout                                       | 30 - 90 days      | Never                 | Anticoagulants<br>Statins        | Anticoagulant<br>Statins                | FLOOR              | 6/25/14      | Rehab                    | EXTUBATION                   | 0    | 0              | 1           | 0             | 0      | 66          | 132        | 21.3 |
| 2  | SICU         | 6/18/14       | 6/20/14        | 51 - 60   | 6/18/14         | 6/18/14        | 6/18/14                | Fluid overload/worsening hepatic function/liver transplant                                 | Cirrhosis<br>Hepatorenal syndrome<br>Leukemia<br>Esophageal varices<br>Benign colonic polyps<br>DM 2                     | 30-90 days        | Unknown               | Insulin<br>Diuretics             | Insulin<br>Diuretics<br>Antibiotics     | Floor              | 7/4/14       | Home                     | Extubated                    | 0    | 0              | 1           | 0             | 0      | 71          | 223.3      | 31.3 |
| 3  | MCU          | 6/19/14       | 6/26/14        | 51 - 60   | 6/16/14         | 6/17/14        | 6/18/14                | Pneumonia/Confusion and gait abnormality/Migraine                                          | Colitis<br>COPD<br>Depression<br>Ulcerative Esophagitis<br>Restless leg syndrome                                         | 30 - 90 days      | Never                 | Steroids<br>Immunosuppressants   | Immunosuppressants                      | N/A                | 7/3/14       | OUTSIDE FACILITY         | EXTUBATION                   | 1    | 0              | 1           | 0             | 0      | 63          | 208.3      | 36.9 |
| 4  | SICU         | 6/19/14       | 6/20/14        | 61 - 70   | 6/19/14         | 6/19/14        | 6/19/14                | Unruptured anterior communicating artery aneurysm/Post operative respiratory insufficiency | Hypertension<br>DM<br>Depression                                                                                         | Unknown           | Never                 |                                  |                                         | FLOOR              | 6/23/14      | HOME                     | EXTUBATION                   |      |                |             | 1             |        | 64          | 340        | 58.3 |
| 5  | SICU         | 6/20/14       | 7/2/14         | 81 - 90   | 6/19/14         | 6/19/14        | 6/19/14                | Rectal perforation/fecal peritonitis/septic shock                                          | Pneumonia<br>Anemia<br>Respiratory Failure<br>Dementia<br>Hypertension<br>Peri-splenic abscess s/p percutaneous drainage | 30 - 90 days      |                       |                                  |                                         | OUTSIDE FACILITY   | 7/10/14      | OUTSIDE FACILITY         | ICU/DC                       |      |                |             | 1             |        | 58          | 100        | 23.3 |
| 6  | ICU          | 6/24/14       | 6/28/14        | 61 - 70   | 6/23/14         | 6/23/14        | 6/23/14                | Hyoxic respiratory failure/Septic shock/Unresponsive/acute on chronic renal failure        | Hypertension<br>Hyperlipidemia<br>Chronic kidney disease                                                                 | > 1 year          | Never                 | Statins                          | Statins                                 | FLOOR              | 7/7/14       | HOME                     | EXTUBATION                   | 0    | 0              | 0           | 0             | 0      | 67          | 145        | 30.1 |
| 7  | SICU         | 6/25/14       | 6/30/14        | 61 - 70   | 6/23/14         | 6/24/14        | 6/24/14                | Acute cholecystitis/Sepsis                                                                 | Hyperlipidemia<br>Hypothyroidism<br>Diverticulitis s/p hepatico jejunostomy<br>CAD                                       | 30 - 90 days      | Unknown               |                                  |                                         | FLOOR              | 7/5/14       | Home                     | EXTUBATION                   |      |                |             | 1             |        |             |            |      |
| 8  | ICU          | 6/27/14       | 6/28/14        | 51 - 60   | 6/27/14         | 6/27/14        | 6/27/14                | ACUTE REP FAILURE<br>METABOLIC ACIDOSIS<br>ACUTE RENAL FAILURE                             | Hypertension<br>DM<br>Hyperlipidemia<br>Depression<br>GI bleed<br>Diverticulitis                                         | > 1 year          | Never                 |                                  |                                         | DECEASED           | 6/28/14      | DECEASED                 | DECEASED                     | 1    | 0              | 0           | 0             | 0      | 68          | 178.4      | 28.8 |
| 9  | SICU         | 6/27/14       | 7/5/14         | 61 - 70   | 6/26/14         | 6/27/14        | 6/28/14                | Abdominal aortic aneurysm/Gram negative pneumonia                                          | Hypertension<br>COPD<br>OSA<br>DM<br>Atrial Fibrillation<br>Heart Failure<br>Gout                                        | > 1 year          |                       |                                  |                                         | FLOOR              | 7/14/14      | Rehab                    | EXTUBATED                    | 0    | 1              |             | 1             |        | 70          | 259        | 37.6 |
| 10 | MCU          | 6/30/14       | 7/14/14        | 71 - 80   | 6/29/14         | 6/29/14        | 6/29/14                | Acute respiratory failure/Encephalopathy/ Liver disease/Mi/Sepsis and shock                | DM<br>Partial thyroidectomy<br>ETOH abuse                                                                                | Unknown           | Never                 |                                  |                                         | FLOOR              | 7/21/14      | DECEASED                 | EXTUBATED                    | 1    | 0              | 0           | 0             | 0      | 70          | 208        | 26.9 |
| 11 | ICU          | 7/2/14        | 7/11/14        | 51 - 60   | 7/1/14          | 7/1/14         | 7/1/14                 | Heart failure/respiratory failure/renal failure                                            | Hypertension<br>DM 2<br>Hyperlipidemia<br>Gilbert disease                                                                | Last 30 days      | Never                 | Statins                          |                                         | DECEASED           | 7/10/14      | DECEASED                 | DECEASED                     | 0    | 0              | 0           | 0             | 0      | 68          | 189        | 28.7 |
| 12 | MCU          | 7/4/14        | 7/14/14        | 61 - 70   | 7/4/14          | 7/4/14         | 7/4/14                 | Hyoxic respiratory failure/pneumonia/Septic shock                                          | Hyperlipidemia<br>DM<br>Pneumonia<br>Parkinsons<br>Myasthenia gravis                                                     | 90 days to 1 year | Current               | Insulin<br>Statins<br>Probiotics |                                         | FLOOR              | 7/19/14      | Skilled Nursing Facility | Extubated                    |      |                |             |               |        | 72          | 178.8      | 24   |
| 13 | ICU          | 7/4/14        | 7/6/14         | 71 - 80   | 6/13/14         | 6/17/14        | 7/4/14                 | Hematuria/hemoptysis                                                                       | Hypertension<br>Right sjogrens raynauds<br>GERD<br>Ischial lung disease                                                  | 30 - 90 days      | Never                 | Probiotics<br>Statins            |                                         | DECEASED           | 7/6/14       | DECEASED                 | DECEASED                     | 0    | 0              | 0           | 0             | 0      | 59          | 147        | 29.8 |
| 14 | SICU         | 7/6/14        | 7/17/14        | 71 - 80   | 7/1/14          | 7/6/14         | 7/6/14                 | Ureteral blockage/hydronephrosis                                                           | Chronic kidney disease<br>COPD<br>Hypertension<br>Hypercholesterolemia                                                   | 90 days to 1 year | Unknown               | Statins                          | Insulin<br>Antibiotics<br>Anticoagulant | FLOOR              | 7/28/14      | Long term care facility  | EXTUBATED                    |      |                |             | 1             |        | 69          | 209        | 31   |
| 15 | SICU         | 7/7/14        | 7/17/14        | 41 - 50   | 7/6/14          | 7/6/14         | 7/6/14                 | Necrotizing fasciitis                                                                      | CHF<br>Anxiety<br>Hypertension<br>Hyperlipidemia                                                                         | Unknown           | Never                 | Antibiotics                      |                                         | FLOOR              | 7/30/14      | REHAB                    | EXTUBATED                    |      |                |             | 1             |        | 74          | 220        | 28.2 |
| 16 | MCU          | 7/11/14       | 7/15/14        | 51 - 60   | 7/6/14          | 7/11/14        | 7/11/14                | Hypovolemic Shock                                                                          | GERD                                                                                                                     | Unknown           | Unknown               |                                  |                                         | FLOOR              | 7/18/14      | HOME                     | EXTUBATED                    | 0    | 0              | 0           | 0             | 0      | 60          | 99         | 19.6 |
| 17 | ICU          | 7/11/14       | 7/15/14        | 51 - 60   | 7/8/14          | 7/8/14         | 7/10/14                | Thrombocytopenia/ anemia                                                                   | ITP<br>Atypical CLL<br>Hypertension<br>Hyperlipidemia<br>COPD<br>Hepatitis B<br>s/p splenectomy                          | Last 30 days      | Never                 |                                  |                                         | Outside Hospital   | 7/14/14      | Outside Hospital         | Transfer to outside hospital | 0    | 0              | 0           | 0             | 0      | 64          | 157        | 26.9 |
| 18 | ICU          | 7/13/14       | 7/22/14        | 71 - 80   | 7/12/14         | 7/12/14        | 7/12/14                | Cardiac arrest/respiratory failure                                                         | Anemia<br>Pulmonary embolism<br>Breast Cancer<br>CHF<br>Mitral valve regurgitation                                       | Unknown           | Never                 | Statins                          | Statins<br>Chemotherapy                 | DECEASED           | 7/22/14      | DECEASED                 | CMO                          | 0    | 0              | 1           | 0             | 0      | 61          | 132        | 24.9 |
| 19 | SICU         | 7/14/14       | 7/25/14        | 51 - 60   | 7/12/14         | 7/13/14        | 7/13/14                | Perforated gastric ulcer                                                                   | COPD<br>CHF                                                                                                              | Unknown           | Unknown               |                                  |                                         | Rehab              | 8/28/14      | Rehab                    | TRACH                        | 0    | 1              | 0           | 1             | 0      | 71          | 224        | 31.5 |
| 20 | MCU          | 5/20/15       | 5/21/15        | 51 - 60   | 5/19/15         | 5/20/15        | 5/19/15                | Unresponsiveness<br>Seizures                                                               | Unknown                                                                                                                  | Unknown           | Unknown               | Unknown                          |                                         | FLOOR              | 5/22/15      | HOME                     | EXTUBATED                    | 0    | 0              | 0           | 0             | 0      | 72          | 154        | 20.9 |
| 21 | MCU          | 7/15/14       | 7/23/14        | 51 - 60   | 7/14/14         | 7/15/14        | 7/14/14                | ETOH/respiratory failure/renal failure/Sepsis/Pneumonia                                    | Alcohol dependence                                                                                                       | Last 30 days      | Never                 |                                  |                                         | FLOOR              | 7/29/14      | HOME                     | EXTUBATED                    | 1    | 1              | 0           | 0             | 0      | 69          | 154        | 22.7 |

|    |          |         |         |         |         |         |         |                                                                                                                                                                                     |                     |              |         |                           |                    |                         |          |                          |              |   |   |   |   |   |    |       |      |
|----|----------|---------|---------|---------|---------|---------|---------|-------------------------------------------------------------------------------------------------------------------------------------------------------------------------------------|---------------------|--------------|---------|---------------------------|--------------------|-------------------------|----------|--------------------------|--------------|---|---|---|---|---|----|-------|------|
| 22 | SICU     | 7/15/14 | 7/19/14 | 81 - 90 | 7/7/14  | 7/15/14 | 7/15/14 | Cholelithiasis/cholecystitis secondary to pancreatic mass                                                                                                                           | DM                  | Last 30 days | Unknown | Insulin                   | Antibiotics        | DECEASED                | 7/19/14  | DECEASED                 | CMO          | 0 | 0 | 0 | 1 | 0 | 59 | 119   | 24   |
|    |          |         |         |         |         |         |         | Gallstone/cholecystitis<br>GERD<br>Pancreatic cancer<br>Gilbert syndrome                                                                                                            |                     |              |         |                           |                    |                         |          |                          |              |   |   |   |   |   |    |       |      |
| 23 | ICU      | 7/20/14 | 8/1/14  | 61 - 70 | 7/19/14 | 7/19/14 | 7/19/14 | Multisystem failure/Septic shock/MSSA pneumonia                                                                                                                                     | CAD                 | > 1 year     | Never   | Statins                   | Statins            | DECEASED                | 8/1/14   | DECEASED                 | DECEASED     | 0 | 0 | 0 | 0 | 0 | 71 | 174   | 24.4 |
|    |          |         |         |         |         |         |         | Hypertension<br>Hyperlipidemia<br>COPD<br>Alcohol and tobacco dependence                                                                                                            |                     |              |         |                           |                    |                         |          |                          |              |   |   |   |   |   |    |       |      |
| 24 | MCU      | 7/20/14 | 7/26/14 | 51 - 60 | 7/11/14 | 7/20/14 | 7/20/14 | Liver cirrhosis/ARF/Hepatorenal syndrome                                                                                                                                            | Atrial Fibrillation | Last 30 days | Unknown | Statins                   | Antibiotics        | FLOOR                   | 8/9/14   | DECEASED                 | EXTUBATED    | 0 | 0 | 0 | 0 | 0 | 60 | 101.9 | 20   |
|    |          |         |         |         |         |         |         | CHF<br>Cirrhosis                                                                                                                                                                    |                     |              |         | Statins                   |                    |                         |          |                          |              |   |   |   |   |   |    |       |      |
| 25 | MCU      | 5/20/15 | 5/23/15 | 71 - 80 | 5/18/15 | 5/18/15 | 5/18/15 | Subdural Hematoma                                                                                                                                                                   | HTN                 | Last 30 days | Unknown | Albuterol                 | Deceased           | 5/22/15                 | Deceased | Deceased                 | 0            | 0 | 0 | 0 | 0 | 0 | 70 | 208   | 29.8 |
|    |          |         |         |         |         |         |         | DVT<br>Kidney Transplant<br>Aortic Stenosis<br>Focal Sclerosing GN<br>Cholecystitis<br>Pneumonia<br>PE<br>Angina<br>Diastolic CHF<br>Skin Cancer<br>CKD stage 3<br>High Cholesterol |                     |              |         | Stent<br>Anti-Coagulation |                    |                         |          |                          |              |   |   |   |   |   |    |       |      |
| 26 | ICU      | 7/22/14 | 7/25/14 | 71 - 80 | 7/21/14 | 7/21/14 | 7/21/14 | Acute respiratory failure/Septic shock/UTI/Pneumonia                                                                                                                                | Atrial Fibrillation | > 1 year     | Never   | Statins                   | Antibiotics        | FLOOR                   | 8/2/14   | Long Term Care Facility  | EXTUBATED    | 0 | 0 | 0 | 0 | 0 | 62 | 211.2 | 35.9 |
|    |          |         |         |         |         |         |         | Cirrhosis<br>DM 2<br>Hypothyroidism<br>Cancer<br>Gastric Ulcer                                                                                                                      |                     |              |         |                           |                    |                         |          |                          |              |   |   |   |   |   |    |       |      |
| 27 | MCU      | 7/22/14 | 7/24/14 | 71 - 80 | 7/21/14 | 7/22/14 | 7/22/14 | Septic shock/ARF/Renal effusion/Shock                                                                                                                                               | Pneumonia           | Last 30 days | Never   | Antibiotics               | Antibiotics        | FLOOR                   | 8/1/14   | HOME                     | EXTUBATED    | 0 | 0 | 1 | 0 | 0 | 60 | 121.3 | 23.7 |
|    |          |         |         |         |         |         |         | C. Difficile infection<br>Hypertension<br>Hyperlipidemia<br>Chronic kidney disease<br>GERD                                                                                          |                     |              |         | Statins                   | Statins            |                         |          |                          |              |   |   |   |   |   |    |       |      |
| 28 | MCU      | 7/22/14 | 7/23/14 | 61 - 70 | 7/15/14 | 7/21/14 | 7/21/14 | Septic shock secondary to pneumonia                                                                                                                                                 | CHF                 | > 1 year     | Never   | Statins                   | Antibiotics        | DECEASED                | 7/30/14  | DECEASED                 | EXTUBATED    | 0 | 0 | 1 | 0 | 0 | 72 | 309.3 | 42.4 |
|    |          |         |         |         |         |         |         | Pneumonia<br>Hypertension<br>COPD                                                                                                                                                   |                     |              |         |                           | Immunosuppressants |                         |          |                          |              |   |   |   |   |   |    |       |      |
| 29 | SICU     | 7/22/14 | 7/30/14 | 51 - 60 | 7/21/14 | 7/21/14 | 7/21/14 | Polytrauma                                                                                                                                                                          |                     | Unknown      | Never   |                           |                    | TRANSFER                | 8/1/14   | OUTSIDE HOSP             | EXTUBATED    | 0 | 0 | 0 | 1 | 1 | 62 | 169.8 | 31.1 |
| 30 | ICU      | 7/25/14 | 7/27/14 | 41 - 50 | 7/19/14 | 7/19/14 | 7/19/14 | Varicella infection/ARDS                                                                                                                                                            | Fibromyalgia        | Last 30 days | Never   | Immunosuppressants        | Antibiotics        | FLOOR                   | 7/30/14  | REHAB                    | EXTUBATED    | 0 | 1 | 0 | 0 | 0 | 64 | 185.7 | 31.8 |
|    |          |         |         |         |         |         |         | Anemia<br>COPD<br>Sarcoidosis<br>Brain aneurysm slip clipping                                                                                                                       |                     |              |         | Steroids                  |                    |                         |          |                          |              |   |   |   |   |   |    |       |      |
| 31 | MCU      | 7/25/14 | 8/2/14  | 71 - 80 | 7/24/14 | 7/24/14 | 7/24/14 | Acute respiratory failure/cardio-genic shock                                                                                                                                        |                     | Last 30 days | Unknown | Statins                   | Antibiotics        | FLOOR                   | 8/9/14   | REHAB                    | EXTUBATED    | 0 | 0 | 0 | 0 | 0 | 59 | 156   | 31.4 |
|    |          |         |         |         |         |         |         | Hypertension<br>Hyperlipidemia<br>Pneumonia<br>CHF<br>Osteoarthritis                                                                                                                |                     |              |         |                           |                    |                         |          |                          |              |   |   |   |   |   |    |       |      |
| 32 | ICU      | 7/26/14 | 7/29/14 | 61 - 70 | 7/25/14 | 7/25/14 | 7/25/14 | Acute respiratory failure/shock                                                                                                                                                     | Pulmonary embolism  | Unknown      | Never   | Anticoagulants            | Anticoagulant      | FLOOR                   | 8/15/14  | DECEASED                 | EXTUBATED    | 0 | 0 | 0 | 0 | 0 | 64 | 110   | 18.8 |
|    |          |         |         |         |         |         |         | Thyroid cancer<br>Cardiomyopathy<br>basal cell carcinoma<br>Metastatic breast cancer                                                                                                |                     |              |         | Chemotherapeutics         | Chemotherapeutics  |                         |          |                          |              |   |   |   |   |   |    |       |      |
| 33 | SICU     | 7/31/14 | 8/3/14  | 51 - 60 | 7/26/14 | 7/30/14 | 7/30/14 | Respiratory failure/Sepsis/Renal failure                                                                                                                                            | Hypertension        | Last 30 days | Current |                           |                    | DECEASED                | 8/3/14   | DECEASED                 | CMO          | 1 | 0 | 1 | 0 | 0 | 67 | 235   | 37   |
|    |          |         |         |         |         |         |         | Cirrhosis<br>Depression<br>GERD                                                                                                                                                     |                     |              |         |                           |                    |                         |          |                          |              |   |   |   |   |   |    |       |      |
| 34 | SICU     | 7/31/14 | 8/8/14  | 81 - 90 | 7/30/14 | 7/30/14 | 7/30/14 | Perforated colon                                                                                                                                                                    | Sigmoid Proctemaker | Last 30 days | Never   | Chemotherapeutics         | Antibiotics        | FLOOR                   | 8/13/14  | DECEASED                 | EXTUBATED    | 0 | 0 | 0 | 1 | 0 | 64 | 161   | 27.5 |
|    |          |         |         |         |         |         |         | Hypothyroidism<br>B-cell lymphoma<br>Melanoma                                                                                                                                       |                     |              |         |                           |                    |                         |          |                          |              |   |   |   |   |   |    |       |      |
| 35 | MCU      | 7/31/14 | 8/3/14  | > 91    | 7/31/14 | 7/31/14 | 7/31/14 | Pneumonia/Sepsis                                                                                                                                                                    | CAD                 | Unknown      | Unknown | Statins                   | Anticoagulants     | FLOOR                   | 8/9/14   | REHAB                    | EXTUBATED    | 0 | 0 | 1 | 0 | 0 | 69 | 198   | 29.2 |
|    |          |         |         |         |         |         |         | Atrial Fibrillation<br>Pulmonary embolism<br>Hypertension<br>Dementia<br>BPH<br>Colon adenoma                                                                                       |                     |              |         | Anticoagulant             | Anticoagulant      |                         |          |                          |              |   |   |   |   |   |    |       |      |
| 36 | MCU      | 8/3/14  | 8/12/14 | 71 - 80 | 8/2/14  | 8/2/14  | 8/2/14  | Acute hypoxic respiratory failure/E.coli septicemia                                                                                                                                 | CAD                 | > 1 year     | Unknown |                           |                    | FLOOR                   | 8/22/14  | SKILLED NURSING FACILITY | EXTUBATED    | 0 | 0 | 0 | 0 | 0 | 69 | 158.4 | 23.5 |
|    |          |         |         |         |         |         |         | Atrial Fibrillation<br>Hyperlipidemia<br>CHF<br>Pneumonia<br>Hypothyroidism<br>oligodendroglioma                                                                                    |                     |              |         |                           |                    |                         |          |                          |              |   |   |   |   |   |    |       |      |
| 37 | SICU     | 8/7/14  | 8/25/14 | 61 - 70 | 8/6/14  | 8/9/14  | 8/9/14  | Necrotizing fasciitis/Septic shock                                                                                                                                                  | Hypertension        | Unknown      | Unknown |                           |                    | Long term care facility | 9/25/14  | Long term care facility  | Tracheostomy | 1 | 0 | 0 | 0 | 0 | 69 | 231   | 34.3 |
|    |          |         |         |         |         |         |         | Atrial Fibrillation<br>Gout                                                                                                                                                         |                     |              |         |                           |                    |                         |          |                          |              |   |   |   |   |   |    |       |      |
| 38 | MCU      | 8/10/14 | 8/16/14 | 61 - 70 | 8/9/14  | 8/9/14  | 8/9/14  | Acute respiratory failure/Septic shock                                                                                                                                              | Crest syndrome      | Unknown      | Never   |                           |                    | Floor                   | 8/21/14  | Rehab                    | Extubated    | 0 | 0 | 0 | 0 | 0 | 63 | 123   | 21.9 |
|    |          |         |         |         |         |         |         | Esophageal strictures<br>Breast cancer s/p mastectomy                                                                                                                               |                     |              |         |                           |                    |                         |          |                          |              |   |   |   |   |   |    |       |      |
| 39 | MCU      | 8/10/14 | 8/17/14 | 61 - 70 | 8/6/14  | 8/9/14  | 8/10/14 | Encephalopathy/GI bleed/Septic shock                                                                                                                                                | Hypertension        | Never        | Never   |                           |                    | Deceased                | 8/16/14  | Deceased                 | CMO          | 0 | 0 | 0 | 0 | 0 | 63 | 156   | 27.7 |
|    |          |         |         |         |         |         |         | Cirrhosis<br>Depression<br>Chronic kidney disease                                                                                                                                   |                     |              |         |                           |                    |                         |          |                          |              |   |   |   |   |   |    |       |      |
| 40 | SICU     | 8/11/14 | 8/19/14 | 81 - 90 | 8/9/14  | 8/9/14  | 8/9/14  | Small bowel obstruction                                                                                                                                                             | Hyperlipidemia      | > 1 year     | Unknown | Statins                   |                    | Floor                   | 8/29/14  | Skilled Nursing Facility | Extubated    | 0 | 0 | 0 | 1 | 0 | 69 | 169.4 | 25.1 |
|    |          |         |         |         |         |         |         | Prostate cancer<br>Hypertension<br>H.Pylori<br>Colon polyp                                                                                                                          |                     |              |         |                           |                    |                         |          |                          |              |   |   |   |   |   |    |       |      |
| 41 | SICU     | 8/11/14 | 8/21/14 | 61 - 70 | 8/9/14  | 8/9/14  | 8/11/14 | Polytrauma                                                                                                                                                                          | CAD                 | Unknown      | Unknown | Statins                   |                    | Long term care facility | 8/28/14  | Long term care facility  | Tracheostomy | 1 | 0 | 0 | 0 | 1 | 69 | 259.6 | 38.5 |
|    |          |         |         |         |         |         |         | Hypertension<br>DM<br>S/p CABG<br>Gout                                                                                                                                              |                     |              |         |                           |                    |                         |          |                          |              |   |   |   |   |   |    |       |      |
| 42 | SICU/MCU | 8/12/14 | 8/23/14 | 51 - 60 | 8/9/14  | 8/9/14  | 8/10/14 | Subdural hematoma/Acute respiratory failure/ENR pneumonia                                                                                                                           | COPD                | Unknown      | Unknown | Anticoagulants            |                    | Floor                   | 8/27/14  | Deceased                 | Extubated    | 0 | 1 | 0 | 0 | 0 | 63 | 173.1 | 30.7 |

| Case # | Unit | Admission Date | Discharge Date | Age   | Gender | Primary Diagnosis                                                                  | Secondary Diagnosis                                                                                                                                                                  | Discharge Status  | Discharge Date | Discharge Location                                                 | ICU                      | Med                     | Other                    | Transfers               | ICU Days            | Med Days | Other Days | ICU Cost | Med Cost | Other Cost |    |     |      |      |
|--------|------|----------------|----------------|-------|--------|------------------------------------------------------------------------------------|--------------------------------------------------------------------------------------------------------------------------------------------------------------------------------------|-------------------|----------------|--------------------------------------------------------------------|--------------------------|-------------------------|--------------------------|-------------------------|---------------------|----------|------------|----------|----------|------------|----|-----|------|------|
| 43     | SICU | 8/14/14        | 8/16/14        | 51-60 | M      | Dislodged R drain/ Sepsis/shock/Cardiogenic shock/Multiple organ failure           | COPD<br>Hypothyroidism<br>Hepatoellular Carcinoma<br>Cirrhosis<br>Hypothyroidism<br>Rheumatologic disorder<br>Hypercoagulable state<br>DVT<br>Hyperlipidemia<br>Colorectal carcinoma | Last 30 days      | Unknown        | Antibiotics                                                        | Antibiotics              | Deceased                | 8/15/14                  | Deceased                | CMO                 | 1        | 0          | 1        | 0        | 0          | 0  | 65  | 139  | 23.2 |
| 44     | MCU  | 8/14/14        | 8/15/14        | 41-50 | M      | Seizure like activity/severe headaches/Cryptococcal meningitis/Respiratory failure | Hypothyroidism<br>Hepatoellular Carcinoma<br>Hepatitis C<br>GERD<br>s/p bile donor liver transplant 2009                                                                             | Unknown           | Unknown        | Anticoagulants                                                     | Antibiotics              | Deceased                | 8/15/14                  | Deceased                | CMO                 | 0        | 0          | 0        | 0        | 0          | 0  | 62  | 125  | 23.1 |
| 45     | ICU  | 8/16/14        | 9/4/14         | 51-60 | M      | RLL mass vs pneumonia                                                              | Hypertension<br>Paranoid schizophrenia                                                                                                                                               | Unknown           | Current        | Statins                                                            | Antibiotics              | Long term care facility | 9/19/14                  | Long term care facility | Tracheostomy        | 0        | 1          | 0        | 0        | 0          | 0  | 69  | 152  | 22.5 |
| 46     | SICU | 5/21/15        | 5/23/15        | 71-80 | M      | Atherosclerosis of Arteries of Extremities with Gangrene                           | PVD<br>CAD<br>DM<br>HTN<br>Hyperlipidemia<br>Venous insufficiency                                                                                                                    | Unknown           | Never          | Insulin<br>Statin                                                  | Skilled nursing Facility | 6/22/15                 | Skilled nursing Facility | Extubated               | 0                   | 1        | 0          | 0        | 0        | 0          | 65 | 216 | 35.9 |      |
| 47     | MCU  | 8/16/14        | 8/19/14        | 71-80 | M      | Acute respiratory failure                                                          | Hypertension<br>Asthma<br>Dyslipidemia                                                                                                                                               | Unknown           | Never          | Statins                                                            | Antibiotics              | Floor                   | 8/26/14                  | Home w/ VNA             | Extubated           | 0        | 0          | 1        | 0        | 0          | 0  | 73  | 171  | 22.7 |
| 48     | MCU  | 8/20/14        | 8/26/14        | 31-40 | M      | Respiratory failure/Pneumonia/Septic shock/Acute renal failure                     | Miscarriage                                                                                                                                                                          | 30-90 days        | Never          | Antibiotics                                                        | Antibiotics              | Deceased                | 8/26/14                  | Deceased                | Deceased            | 0        | 0          | 0        | 0        | 0          | 0  | 62  | 178  | 32.9 |
| 49     | ICU  | 8/21/14        | 8/25/14        | 31-40 | M      | Hepatic failure/Sepsis/Severe shock/multorgan failure                              | Bipolar Depression<br>Anxiety                                                                                                                                                        | Unknown           | Never          | Statins                                                            | Antibiotics              | Deceased                | 8/25/14                  | Deceased                | CMO                 | 0        | 0          | 0        | 0        | 0          | 0  | 64  | 183  | 31.2 |
| 50     | SICU | 8/22/14        | 9/3/14         | 71-80 | M      | Postoperative sepsis/gastroic leak                                                 | COPD<br>Hypertension<br>Hypothyroidism                                                                                                                                               | Unknown           | Unknown        | Statins<br>Antibiotics                                             | Antibiotics              | Long term care facility | 10/7/14                  | Long term care facility | Tracheostomy        | 0        | 0          | 1        | 0        | 0          | 0  | 67  | 284  | 44.7 |
| 51     | MCU  | 8/26/14        | 8/29/14        | 71-80 | M      | Acute respiratory failure/Septic shock/CHF                                         | DM<br>Hypertension<br>Recurrent UTI<br>Atrial Fibrillation<br>Hypothyroidism<br>Anemia<br>Osteoarthritis<br>CAD                                                                      | 90 days to 1 year | Never          | Statins                                                            | Antibiotics              | Floor                   | 9/4/14                   | REHAB                   | Extubated           | 0        | 0          | 1        | 0        | 0          | 0  | 60  | 136  | 26.7 |
| 52     | MCU  | 8/26/14        | 9/2/14         | 61-70 | M      | Acute hypoxic respiratory failure/Pneumonia                                        | Bladder Cancer<br>Gastric ulcers                                                                                                                                                     | 90 days to 1 year | Unknown        | Antibiotics                                                        |                          | FLOOR                   | 9/8/14                   | Home                    | Extubated           | 0        | 1          | 0        | 0        | 0          | 0  | 69  | 220  | 32.7 |
| 53     | MCU  | 8/27/14        | 9/3/14         | 51-60 | M      | Lower extremity paresthesia/epidural/spinal abscess/MRSA bacteremia                | Depression<br>Hep C Cirrhosis                                                                                                                                                        | Unknown           | Current        |                                                                    | Antibiotics              | Deceased                | 9/3/14                   | Deceased                | CMO                 | 1        | 0          | 0        | 0        | 0          | 0  | 73  | 213  | 28.2 |
| 54     | SICU | 8/27/14        | 8/30/14        | 51-60 | M      | s/p right partial nephrectomy                                                      | Hypertension<br>Osteoarthritis<br>Renal Cancer                                                                                                                                       | Unknown           | Unknown        | Statins                                                            | Antibiotics              | Floor                   | 9/2/14                   | Home                    | Extubated           | 0        | 0          | 1        | 0        | 0          | 0  | 71  | 251  | 35.2 |
| 55     | SICU | 8/29/14        | 8/31/14        | 71-80 | M      | PEA Arrest                                                                         | Cardiomyopathy<br>Anemia<br>Malignant colon polyp<br>Tachyarrhythmia<br>Hypoxia                                                                                                      | Last 30 days      | Unknown        |                                                                    | Antibiotics              | Floor                   | 9/16/14                  | REHAB                   | Extubated           | 0        | 0          | 0        | 0        | 0          | 0  | 63  | 99   | 17.5 |
| 56     | SICU | 8/30/14        | 9/5/14         | 81-90 | M      | Right hepatic artery transection s/p laparoscopic cholecystectomy                  | Atrial Fibrillation<br>CHF<br>Lymphoma<br>Hyperlipidemia<br>Hypertension<br>Hypothyroidism                                                                                           | Unknown           | Unknown        | Antibiotics                                                        | Antibiotics              | Floor                   | 9/23/14                  | Nursing Facility        | EXTUBATED           | 0        | 0          | 0        | 1        | 0          | 0  | 66  | 110  | 17.7 |
| 57     | MCU  | 9/2/14         | 9/4/14         | 71-80 | M      | Altered mental status/Right sided weakness/Unresponsive /Viral meningitis/ARF      | Atrial Fibrillation<br>Stroke<br>Hypertension<br>Hyperlipidemia<br>Breast cancer s/p right mastectomy                                                                                | > 1 year          | Never          | Statins                                                            |                          | Floor                   | 9/9/14                   | Rehab                   | Extubated           | 0        | 0          | 0        | 0        | 0          | 0  | 65  | 145  | 24.2 |
| 58     | SICU | 9/2/14         | 9/16/14        | 61-70 | M      | Polytrauma following a fall                                                        | ETOH abuse<br>Hypertension<br>C2 fracture<br>Inguinal hernia repair                                                                                                                  | > 1 year          | Never          |                                                                    |                          | Long term care facility | 9/26/14                  | Long term care facility | Extubated           | 1        | 0          | 0        | 0        | 0          | 0  | 73  | 169  | 22.5 |
| 59     | MCU  | 9/3/14         | 9/18/14        | 51-60 | M      | Acute hypoxic respiratory failure/Right sided opacification                        | Hypertension<br>Alcohol/tobacco use                                                                                                                                                  | Unknown           | Unknown        | None                                                               | Antibiotics              | Long term care facility | 10/1/14                  | Long term care facility | Tracheostomy        | 1        | 1          | 0        | 0        | 0          | 0  | 72  | 165  | 22.4 |
| 60     | ICU  | 9/4/14         | 9/5/14         | 41-50 | M      | Altered mental status                                                              | Culter's with ileocolic resection<br>Obstructive uroterolithiasis<br>s/p right nephrectomy                                                                                           | 30-90 days        | Never          | Pain medication                                                    |                          | Floor                   | 9/7/14                   | Home                    | Extubated           | 0        | 1          | 0        | 0        | 0          | 0  | 65  | 121  | 20.1 |
| 61     | SICU | 9/5/14         | 9/8/14         | 81-90 | M      | Perforated bowel                                                                   | Aortic stenosis<br>Breast cancer s/p lumpectomy<br>Hypertension<br>Hypercholesterolemia                                                                                              | Unknown           | Unknown        | Statins                                                            |                          | Floor                   | 9/17/14                  | Long term care facility | Extubated           | 0        | 0          | 0        | 1        | 0          | 0  | 62  | 173  | 32   |
| 62     | SICU | 9/9/14         | 9/18/14        | 61-70 | M      | Enterocutaneous fistula                                                            | Cholecystomy                                                                                                                                                                         | Unknown           | Unknown        | Pain medication<br>Statins<br>Anticoagulant                        | Antibiotics              | Deceased                | 9/17/14                  | Deceased                | CMO                 | 0        | 0          | 0        | 0        | 0          | 0  | 61  | 160  | 30.4 |
| 63     | MCU  | 5/21/15        | 6/4/15         | 61-70 | M      | Alcoholic Ketoacidosis                                                             | Respiratory Failure<br>DVT<br>Alcoholic Hepatitis<br>SVT                                                                                                                             | 90 days to 1 year | No             | Albuterol<br>Metoprolol<br>Steroid<br>CYP17 inhibitor (Abraterone) |                          | Long Term Care          | 6/17/15                  | Long Term Care          | Transfer to another | 1        | 1          | 0        | 0        | 0          | 0  | 69  | 170  | 25.1 |

| Metastatic CA Prostate<br>Cardiomyopathy<br>PEA |     |         |         |         |         |         |         |                                                                      |                                                                                                                                                                                                 |              |         |                                       |                                       |                         |                                         |               |              |   |   |   |   |    |       |       |      |
|-------------------------------------------------|-----|---------|---------|---------|---------|---------|---------|----------------------------------------------------------------------|-------------------------------------------------------------------------------------------------------------------------------------------------------------------------------------------------|--------------|---------|---------------------------------------|---------------------------------------|-------------------------|-----------------------------------------|---------------|--------------|---|---|---|---|----|-------|-------|------|
| 64                                              | MIU | 9/11/14 | 9/25/14 | 61 - 70 | 9/10/14 | 9/10/14 | 9/10/14 | Septic shock/C.Diff colitis/Coagulopathy                             | Cirrhosis<br>s/p liver transplant<br>s/p kidney transplant<br>IDDM 2<br>Anemia<br>VRE endocarditis<br>Hypertension<br>Gout                                                                      | 30-90 days   | Never   | Immunosuppressants<br>Pain medication | Antibiotics<br>Immunosupp<br>ressants | Long term care facility | Long term care facility                 | Tracheostomy  | 0            | 0 | 1 | 0 | 0 | 70 | 180   | 25.9  |      |
| 65                                              | ICU | 9/11/15 | 9/15/14 | 81 - 90 | 9/10/14 | 9/10/14 | 9/10/14 | Found unresponsive/seizure                                           | Hypertension<br>Hyperlipidemia<br>Fibromyalgia<br>GERD<br>Angina pectoris<br>Dementia<br>Essential tremor<br>CKD stage III<br>Left ventricular hypertrophy<br>Ovarian cancer<br>Aortic stenosis | Unknown      | Current | Corticosteroids<br>Anticoagulant      | Deceased                              | 9/16/14                 | Deceased                                | Extubated     | 0            | 0 | 0 | 1 | 0 | 66 | 179.5 | 28.9  |      |
| 66                                              | ICU | 9/13/14 | 9/17/14 | 51 - 60 | 9/11/14 | 9/13/14 | 9/13/14 | Wound Dehiscence                                                     | Metastatic rectal cancer<br>Hypertension<br>s/p laparoscopic cholecystectomy<br>Hyperlipidemia<br>CAD, s/p MI, s/p stent<br>COPD                                                                | 30-90 days   | Never   | Antibiotics<br>Pain Medication        | Antibiotics                           | Floor                   | 9/22/14                                 | Home with VNA | Extubated    | 0 | 1 | 0 | 1 | 0  | 69    | 189.2 | 28.1 |
| 67                                              | ICU | 9/19/14 | 10/3/14 | 71 - 80 | 9/18/14 | 9/18/14 | 9/18/14 | Acute right subdural hemorrhage                                      | Stroke<br>End stage renal disease<br>Dementia                                                                                                                                                   | Unknown      | Unknown |                                       | Heparin drip                          | Rehab                   | 10/2/14                                 | Rehab         | Tracheostomy |   |   |   | 1 |    | 66    | 97    | 15.7 |
| 68                                              | ICU | 9/19/14 | 9/21/14 | 71 - 80 | 9/19/14 | 9/19/14 | 9/19/14 | Expanding abdominal aortic aneurysm with evidence of type 2 endoleak | Hypertension<br>Hypercholesterolemia<br>Chronic lymphoid leukemia<br>s/p appendectomy<br>s/p hemorrhoidectomy<br>Polymyalgia rheumatica                                                         | 1 year       | Never   | Statins<br>Steroids                   |                                       | Floor                   | 9/29/14                                 | Home          | Extubated    |   |   |   | 1 |    | 70    | 198   | 28.4 |
| 69                                              | ICU | 9/20/14 | 9/23/14 | 51 - 60 | 9/18/14 | 9/19/14 | 9/19/14 | Pneumonia/fevers                                                     | Myotonic dystrophy<br>Closed fracture of the cervical vertebral body, dysphagia, s/p G tube placement<br>Aspiration pneumonia                                                                   | 1 year       | Unknown | Vasopressors                          | Antibiotics                           | Deceased                | 10/2/14                                 | Deceased      | CMO          | 0 | 0 | 0 | 0 | 0  | 73    | 143   | 19   |
| 70                                              | MIU | 9/21/14 | 9/23/14 | 61 - 70 | 9/20/14 | 9/20/14 | 9/20/14 | Acute respiratory failure/presumed seizure                           | Depression/anxiety<br>Chronic left hip wound<br>Hypertension<br>Narcotic dependence                                                                                                             | Unknown      | Never   | Diuretic<br>Antibiotics               |                                       | Floor                   | 9/26/14                                 | Rehab         | Extubated    | 0 | 1 | 0 | 0 | 0  | 66    | 101.9 | 16.4 |
| 71                                              | ICU | 9/22/14 | 9/26/14 | 61 - 70 | 9/17/14 | 9/21/14 | 9/21/14 | Elective robotic-assisted sigmoid colectomy                          | Diverticulitis<br>Community acquired pneumonia<br>Shingles<br>Nasal hemorrhage<br>Pancreatic cyst<br>Ovarian cyst<br>Vertigo                                                                    | 30-90 days   | Unknown | Antibiotics<br>Probiotics             | Antibiotics<br>Immunosupp<br>ressants | Deceased                | 9/26/14                                 | Deceased      | CMO          |   |   |   | 1 |    | 62    | 116.8 | 21.5 |
| 72                                              | ICU | 5/21/15 | 5/23/15 | 31 - 40 | 5/20/15 | 5/20/15 | 5/20/15 | Hyponatremia                                                         | Cerebral Palsy<br>Schizo affective<br>Schizophrenia<br>Depression , Anxiety                                                                                                                     | Unknown      | Unknown |                                       |                                       | Floor                   | Home with Health Care<br>6/1/15 service | Extubated     | 0            | 0 | 0 | 0 | 0 | 61 | 119   | 22.5  |      |
| 73                                              | ICU | 9/25/14 | 10/7/14 | 71 - 80 | 9/24/14 | 9/24/14 | 9/24/14 | Abdominal aortic aneurysm                                            | CAD s/p CABG<br>A/a/a<br>Hypertension                                                                                                                                                           | Unknown      | Unknown |                                       |                                       | Long term care facility | Long term care facility                 | Extubated     |              |   |   | 1 |   | 64 | 193.6 | 33.1  |      |
| 74                                              | ICU | 9/25/14 | 9/27/14 | 61 - 70 | 9/22/14 | 9/23/14 | 9/25/14 | Abdominal aortic aneurysm                                            | COPD<br>GERD<br>Hypertension                                                                                                                                                                    | >1 year      | Never   |                                       |                                       | Floor                   | 10/3/14                                 | Rehab         | Extubated    | 1 | 0 | 1 | 1 | 0  | 67    | 145   | 22.8 |
| 75                                              | ICU | 9/26/14 | 9/27/14 | 41 - 50 | 9/20/14 | 9/24/14 | 9/24/14 | Small bowel obstruction secondary to umbilical hernia                | Perforated mucinous adenocarcinoma, s/p appendectomy<br>s/p laparoscopic right hemicolectomy<br>s/p hot intraperitoneal chemotherapy<br>Small bowel obstruction                                 | 30-90 days   | Never   | None                                  | Antibiotics                           | Floor                   | 10/7/14                                 | Home          | Extubated    | 0 | 0 | 0 | 1 | 0  | 70    | 229.5 | 32.9 |
| 76                                              | MIU | 9/27/14 | 10/5/14 | 81 - 90 | 9/27/14 | 9/27/14 | 9/27/14 | PEA arrest/acute respiratory failure                                 | Diabetes<br>Prostate enlargement<br>Cervical bone spur s/p surgery<br>Dysphagia                                                                                                                 | Unknown      | Never   | Hypoglycemics                         |                                       | Deceased                | 10/4/14                                 | Deceased      | CMO          | 0 | 0 | 1 | 0 | 0  | 64    | 100.1 | 17.1 |
| 77                                              | ICU | 5/23/15 | 6/12/15 | 71 - 80 | 5/21/15 | 5/22/15 | 5/21/15 | Primary Adenocarcinoma of Pancreas                                   | Pancreatic CA<br>HTN<br>Hyperlipidemia<br>CKD<br>Peripheral Neuropathy<br>DM,<br>GOUT<br>BPH                                                                                                    | Unknown      |         | Statins                               |                                       | Deceased                | 6/20/15                                 | Deceased      | Tracheostomy | 0 | 0 | 1 | 0 | 0  | 67    | 194   | 30.4 |
| 78                                              | ICU | 9/27/14 | 9/29/14 | 31 - 40 | 9/27/14 | 9/27/14 | 9/27/14 | Altered mental status/medication overdose                            | Nonischemic cardiomyopathy<br>ICD placement in 2009<br>Hyperlipidemia<br>Obesity<br>OSA<br>Depression                                                                                           | 30-90 days   | Never   | Statins                               |                                       | Floor                   | 10/4/14                                 | Home          | Extubated    | 0 | 0 | 0 | 0 | 0  | 70    | 220   | 31.6 |
| 79                                              | ICU | 9/27/14 | 9/28/14 | 51 - 60 | 8/6/14  | 9/25/14 | 9/25/14 | Exploratory laparotomy of extensive mass                             | Chronic kidney disease<br>Diabetes, complicated by retinopathy, neuropathy, nephropathy<br>Hyperlipidemia<br>s/p adrenalectomy                                                                  | Last 30 days | Unknown | Hypotensives                          | Antibiotics                           | Deceased                | 9/28/14                                 | Deceased      | CMO          | 1 | 0 | 0 | 1 | 0  | 65    | 217.8 | 36.4 |

|    |      |          |          |         |          |          |          |                                                             |                                                                                                                                                                                           |                |         |                                      |                                       | Right adrenal tumor |             |               |                |       |      |   |    |       |       |       |      |
|----|------|----------|----------|---------|----------|----------|----------|-------------------------------------------------------------|-------------------------------------------------------------------------------------------------------------------------------------------------------------------------------------------|----------------|---------|--------------------------------------|---------------------------------------|---------------------|-------------|---------------|----------------|-------|------|---|----|-------|-------|-------|------|
| 80 | SICU | 9/28/14  | 9/30/14  | 81 - 90 | 9/26/14  | 9/27/14  | 9/27/14  | Left temporal hemorrhage                                    | COPD<br>AAA<br>Diabetes<br>GI bleed<br>TIA<br>Hypertension<br>CAD<br>Alzheimer dementia                                                                                                   | 30-90 days     | Unknown | Anticoagulants<br>Statins            | Deceased                              | 9/30/14             | Deceased    | CMO           | 73             | 196.2 | 25.9 |   |    |       |       |       |      |
| 81 | SICU | 9/30/14  | 10/7/14  | 61 - 70 | 9/17/14  | 9/29/14  | 9/29/14  | Increased output from abscess drain                         | Pericolic abscess<br>Complicated diverticulitis<br>Seizure disorder<br>Atypical meningioma<br>MDD<br>Hypothyroidism<br>Diabetes                                                           | Last 30 days   | Current | Antibiotics                          | Antibiotics<br>Immunosupp<br>ressants | Floor               | 12/20/14    | Rehab         | Extubated      | 0     | 0    | 1 | 1  | 0     | 60    | 159.9 | 31.5 |
| 82 | MCU  | 10/1/14  | 10/4/14  | 18 - 30 | 9/30/14  | 9/30/14  | 9/30/14  | Presumed heroin overdose/acute respiratory failure/coma     | Depression<br>Drug use<br>Hepatitis C<br>Question endocarditis in 2012                                                                                                                    | Unknown        | Never   | Unknown                              | Deceased                              | 10/3/14             | Deceased    | CMO           | 0              | 1     | 0    | 0 | 0  | N/A   | 194   | N/A   |      |
| 83 | SICU | 10/3/14  | 10/4/14  | 61 - 70 | 10/1/14  | 10/1/14  | 10/1/14  | Peripheral arterial occlusive disease                       | CAD s/p MI<br>Hypertension<br>Lumbar radiculopathy                                                                                                                                        | >1 year        | Unknown |                                      | Floor                                 | 10/9/14             | Rehab       | Extubated     | 1              |       | 1    |   |    | 72    | 176.4 | 23.9  |      |
| 84 | SICU | 10/3/14  | 10/10/14 | 31 - 40 | 10/3/14  | 10/3/14  | 10/3/14  | Acute respiratory failure/sepsis                            | Depression<br>GERD<br>Obesity                                                                                                                                                             | Unknown        | Never   | Antibiotics<br>Pressors<br>Sedatives | Floor                                 | 10/29/14            | Rehab       | Extubated     | 0              | 0     | 0    | 1 | 0  | 64    | 382.8 | 65.5  |      |
| 85 | SICU | 10/4/14  | 10/8/14  | 61 - 70 | 10/3/14  | 10/3/14  | 10/3/14  | Right lower extremity pain                                  | CAD<br>Cervical disk disorder with myelopathy<br>MI in 1989 and 2009<br>Lumbar laminectomy<br>Hyperlipidemia<br>Hypertension<br>COPD                                                      | Last 30 days   | Unknown |                                      | Floor                                 | 10/25/14            | Rehab       | Extubated     | 0              | 0     | 1    | 1 | 0  | 63    | 121   | 21.5  |      |
| 86 | ICU  | 10/5/14  | 10/8/14  | 51 - 60 | 10/4/14  | 10/4/14  | 10/4/14  | Acute respiratory failure/Hypoxic brain injury/Sepsis shock | Type II diabetes<br>Hypertension<br>Stage IV renal disease                                                                                                                                | Unknown        | Never   | Statins                              | Antibiotics                           | Deceased            | 10/8/14     | Deceased      | CMO            |       |      | 0 | 0  | 63    | 140.8 | 25    |      |
| 87 | SICU | 10/8/14  | 10/10/14 | 81 - 90 | 9/20/14  | 10/8/14  | 10/8/14  | Urosepsis/bilateral inguinal hernia/small bowel obstruction | Bladder outlet obstruction<br>Afib<br>Basal cell carcinoma w/ actinic keratosis<br>Prostate cancer<br>Cervical radiculopathy<br>Heart block<br>Hypertension<br>Lumbar disk degeneration   | 90 days-1 year | Never   | Statins<br>Steroids                  | Antibiotics                           | Floor               | 10/16/14    | Care facility | Extubated      | 0     | 0    | 0 | 1  | 1     | 70    | 176   | 25.2 |
| 88 | ICU  | 10/8/14  | 10/17/14 | 51 - 60 | 10/8/14  | 10/8/14  | 10/8/14  | Altered mental status/rife sided facial droop               | None known                                                                                                                                                                                | Unknown        | Never   | None                                 |                                       | 11/8/14             | Deceased    | Tracheostomy  | 0              | 0     | 0    | 0 | 0  | 72    | 314.6 | 42.7  |      |
| 89 | SICU | 10/9/14  | 10/23/14 | 81 - 90 | 10/9/14  | 10/9/14  | 10/9/14  | Motor vehicle accident/subdural hematoma                    | Arthritis<br>Afib<br>Parkinsons                                                                                                                                                           | Unknown        | Never   | Statins<br>Anticoagulants            | Floor                                 | 10/31/14            | Hospice     | Extubated     |                |       | 1    | 1 | 62 | 148.1 | 27.3  |       |      |
| 90 | SICU | 10/10/14 | 10/21/14 | 18 - 30 | 10/9/14  | 10/9/14  | 10/9/14  | Motor vehicle accident                                      | Hepatitis C<br>Heroin addiction<br>Depression/anxiety                                                                                                                                     | Unknown        | Current | Unknown                              | Floor                                 | 11/13/14            | Home        | Extubated     |                |       | 0    | 1 | 64 | 154   | 26.3  |       |      |
| 91 | SICU | 10/10/14 | 10/12/14 | 71 - 80 | 10/9/14  | 10/9/14  | 10/9/14  | Large right occipital intracerebral hemorrhage              | GI bleed<br>Osteoarthritis<br>Pseudogout<br>Migraines                                                                                                                                     | >1 year        | Unknown | Unknown                              | Antibiotics                           | Deceased            | 10/13/14    | Deceased      | CMO            | 0     | 0    | 0 | 1  | 0     | 66    | 165   | 26.6 |
| 92 | SICU | 10/10/14 | 10/11/14 | 41 - 50 | 8/26/14  | 10/10/14 | 10/10/14 | Fournier gangrene                                           | Type II diabetes<br>Recurrent scrotal infections<br>Lower extremity cellulitis and MRSA infection                                                                                         | Unknown        | Unknown | Unknown                              | Antibiotics                           | Floor               | 10/18/14    | Rehab         | Self-Extubated |       |      | 1 |    | 72    | 371.8 | 50.5  |      |
| 93 | SICU | 10/10/14 | 10/25/14 | 81 - 90 | 10/10/14 | 10/10/14 | 10/10/14 | Mechanical fall/multiple fractures                          |                                                                                                                                                                                           | >1 year        |         |                                      |                                       | 11/10/14            | Rehab       | Extubated     |                |       |      |   |    | 71    | 220   | 30.5  |      |
| 94 | SICU | 10/12/14 | 10/13/14 | 51 - 60 | 10/11/14 | 10/11/14 | 10/11/14 | Colon perforation s/p colonoscopy                           | Metastatic uterine cancer<br>Radiation colitis<br>Irritable bowel syndrom<br>Hyperlipidemia                                                                                               | Last 30 days   | Unknown | Hypotensives                         | Floor                                 | 10/26/14            | Home        | Extubated     | 0              | 0     | 0    | 1 | 0  | 64    | 199.5 | 34.1  |      |
| 95 | MCU  | 10/13/14 | 10/15/14 | 51 - 60 | 10/12/14 | 10/12/14 | 10/12/14 | Acute respiratory failure/septic shock/bacteremia           | Diabetes<br>End stage renal disease<br>Hypertension<br>Hyperlipidemia<br>Peripheral vascular disease<br>CAD s/p CABG<br>CHF                                                               | 90 days-1 year | Never   | Antibiotics<br>Pressors              | Floor                                 | 10/24/14            | Home w/ VNA | Extubated     | 0              | 0     | 0    | 0 | 0  | 69    | 232.3 | 34.5  |      |
| 96 | SICU | 10/16/14 | 10/29/14 | 61 - 70 | 9/26/14  | 10/11/14 | 10/14/14 | Perihepatic/peribiliary abscesses                           | Chronic pain syndrome<br>Hyperlipidemia<br>Trigeminal neuralgia<br>Hypertension<br>s/p laminectomy<br>s/p mitral valve replacement                                                        | 30-90 days     | Never   | Anticoagulants<br>Pain meds          | Antibiotics                           | Floor               | 11/17/14    | Rehab         | Extubated      | 0     | 0    | 1 | 1  | 0     | 69    | 224.4 | 33.3 |
| 97 | MCU  | 10/16/14 | 10/22/14 | 41 - 50 | 10/3/14  | 10/15/14 | 10/15/14 | Encephalopathy/incre asing edema                            | Metastatic rectal cancer<br>Sclerosing cholangitis secondary to chemotherapy<br>Sarcocistis<br>Nephrolithiasis<br>Recurrent cholangitis w/ biliary stents<br>Common bile duct stricturing | 30-90 days     | Never   | Chemotherapy<br>Hypotensives         | Antibiotics<br>Immunosupp<br>ressants | Deceased            | 10/22/14    | Deceased      | CMO            | 0     | 0    | 0 | 0  | 0     | 62    | 140.8 | 26   |
| 98 | SICU | 10/17/14 | 10/30/14 | 51 - 60 | 10/15/14 | 10/16/14 | 10/16/14 | Elective right retroigmoid craniotomy                       | Hypertension<br>Glaucoma<br>Many bladder surgeries                                                                                                                                        | 30-90 days     | Never   | Hypotensive                          | Antibiotics<br>Immunosupp<br>ressants | Floor               | 1/7/15      | Rehab         | Tracheostomy   | 0     | 0    | 0 | 1  | 0     | 63    | 143.4 | 25.2 |
| 99 | SICU | 10/20/14 | 10/30/14 | 31 - 40 | 10/20/14 | 10/20/14 | 10/20/14 | Cholecystitis/Severe sepsis                                 | Predabetes                                                                                                                                                                                | Unknown        | Never   | None                                 | Floor                                 | 11/8/14             | Rehab       | Extubated     | 0              | 0     | 0    | 1 | 0  | 70    | 239.8 | 34.4  |      |

|     |          |          |          |          |          |          |                               |                                                 |                                                                                                                                                                                                                  |              |         |                                      |                                                  |                  |           |                  |                   |   |   |   |    |     |       |       |      |
|-----|----------|----------|----------|----------|----------|----------|-------------------------------|-------------------------------------------------|------------------------------------------------------------------------------------------------------------------------------------------------------------------------------------------------------------------|--------------|---------|--------------------------------------|--------------------------------------------------|------------------|-----------|------------------|-------------------|---|---|---|----|-----|-------|-------|------|
| SIU | 10/22/14 | 10/23/14 | 18 - 30  | 10/22/14 | 10/22/14 | 10/22/14 | Polytrauma s/p crushed by car | None                                            | Never                                                                                                                                                                                                            | Never        | None    | Floor                                | 10/27/14                                         | Home             | Extubated | 0                | 0                 | 0 | 0 | 1 | 69 | 132 | 19.6  |       |      |
| 101 | MCU      | 10/24/14 | 10/29/14 | 41 - 50  | 10/14/14 | 10/24/14 | 10/24/14                      | Jaundice/Left knee pain                         | Hepatitis C s/p transplant in 2013                                                                                                                                                                               | Last 30 days | Never   | Insulin                              | Antibiotics<br>Immunosupp<br>ressants<br>Insulin | Floor            | 12/11/14  | Deceased         | Extubated         | 0 | 0 | 0 | 0  | 0   | 66    | 136.4 | 22   |
| 102 | MCU      | 10/24/14 | 10/30/14 | 61 - 70  | 10/23/14 | 10/23/14 | 10/23/14                      | Respiratory failure/lactic acidosis             | Asthma                                                                                                                                                                                                           | >1 year      | Never   | Statins                              | Antibiotics<br>Immunosupp<br>ressants            | Floor            | 11/17/14  | Rehab            | Extubated         | 0 | 0 | 0 | 0  | 0   | 73    | 224.4 | 29.8 |
| 103 | ICU      | 10/25/14 | 10/26/14 | 61 - 70  | 10/24/14 | 10/24/14 | 10/24/14                      | Acute respiratory failure/Seizures              | Polysubstance abuse<br>Seizure<br>PTSD<br>Depression<br>GI bleed<br>Neuropathy                                                                                                                                   | >1 year      | Never   |                                      | Antibiotics                                      | Floor            | 10/27/14  | Home             | Extubated         | 1 |   | 0 | 0  |     |       |       |      |
| 104 | SIU      | 10/25/14 | 11/13/14 | 41 - 50  | 10/23/14 | 10/23/14 | 10/24/14                      | Fournier gangrene                               | Diabetes type 1<br>Obesity<br>Hypertension<br>Diverticulitis<br>Asthma<br>COPD<br>PE<br>OSA<br>Hyperlipidemia<br>Depression                                                                                      | Unknown      | Never   | Anticoagulants<br>Statins<br>Insulin | Antibiotics                                      | Deceased         | 11/12/14  | Deceased         | Deceased          | 0 | 0 | 0 | 1  | 0   | 72    | 497.2 | 67.5 |
| 105 | ICU      | 10/26/14 | 10/31/14 | 61 - 70  | 10/25/14 | 10/25/14 | 10/25/14                      | Acute respiratory failure                       | Inoperable nonsmall cell lung cancer<br>COPD<br>Pneumonia<br>Neurofibromatosis<br>Hyperlipidemia<br>Osteoarthritis<br>s/p appendectomy<br>s/p hysterectomy                                                       | Last 30 days | Current | Statins<br>Antibiotics               | Sedatives<br>Antibiotics                         | Outside hospital | 10/31/14  | Outside hospital | Hospital transfer | 0 | 1 | 0 | 1  | 0   | 61    | 101.2 | 19.1 |
| 106 | ICU      | 10/27/14 | 11/3/14  | 71 - 80  | 10/16/14 | 10/25/14 | 10/25/14                      | Bilateral inguinal hernia incarceration         | CHF<br>s/p pericardial tamponade<br>Bilateral fem-fem bypass<br>Afib<br>Hypertension<br>CAD<br>Chronic kidney disease<br>Anemia<br>Dyslipidemia<br>Recurrent PE<br>Hypothyroidism<br>Gout<br>BPH                 | Last 30 days | Never   | Anticoagulants<br>Statins            | Antibiotics<br>Immunosupp<br>ressants            | Floor            | 11/11/14  | Rehab            | Extubated         | 0 | 0 | 1 | 1  | 0   | 68    | 180.8 | 27.5 |
| 107 | MCU      | 10/28/14 | 11/7/14  | 61 - 70  | 10/26/14 | 10/26/14 | 10/27/14                      | Acute pancreatitis                              | COPD<br>ETOH dependence<br>Hypertension<br>Anxiety<br>Hyperthyroid                                                                                                                                               | >1 year      | Unknown | Statins<br>Steroids                  | Antibiotics<br>Immunosupp<br>ressants            | Floor            | 11/12/14  | Rehab            | Extubated         | 1 | 1 | 0 | 0  | 0   | 63    | 179.5 | 31.9 |
| 108 | MCU      | 10/28/14 | 11/2/14  | 71 - 80  | 10/18/14 | 10/28/14 | 10/28/14                      | Increasing left side subdural hematoma s/p fall | Multiple falls<br>Subdural hematoma<br>Diabetes<br>Hypertension<br>Hypercholesterolemia                                                                                                                          | Last 30 days | Never   | Statins<br>Insulin                   | Antibiotics                                      | Floor            | 11/7/14   | Rehab            | Extubated         |   |   | 1 | 1  | 63  | 184.6 | 32.8  |      |
| 109 | ICU      | 5/23/15  | 5/31/15  | 71 - 80  | 5/15/15  | 5/22/15  | 5/22/15                       | Shortness of Breath                             | Asthma<br>COPD<br>CHF<br>DM<br>HTN<br>Thyroid Disease<br>Anemia<br>Aortic Valve disorder<br>Aspergillosis<br>Cellulitis                                                                                          | Last 30 days |         | Antibiotic                           |                                                  | Deceased         | 5/30/15   | Deceased         | CMO               | 0 | 0 | 0 | 0  | 0   | 63    | 126   | 23.9 |
| 110 | SIU      | 5/24/15  | 6/2/15   | 61 - 70  | 5/22/15  | 5/23/15  | 5/23/15                       | Renal Failure                                   | CA prostate<br>Dyometabolic Syndrom X<br>Hypogonadism<br>Obstructive Sleep Apnea<br>Extrinsic Asthma<br>COPD<br>Diastolic CHF<br>HTN<br>A-fib<br>Peripheral Neuropathy<br>Morbid Obesity<br>Hyperlipidemia<br>DM | unknown      | yes     | Unknown                              | Unknown                                          | Floor            | 6/9/15    | Rehab            | Extubated         | 1 | 0 | 1 | 0  | 0   | 66    | 243   | 39.2 |
| 111 | MCU      | 11/1/14  | 11/6/14  | 61 - 70  | 10/27/14 | 10/27/14 | 11/1/14                       | Septic shock                                    | Diabetes<br>CAD s/p CABG<br>Hyperlipidemia<br>Obesity<br>Neuropathic pain<br>Peripheral vascular disease<br>Cardiomyopathy                                                                                       | Last 30 days | Never   | Insulin                              | Antibiotics                                      | Floor            | 11.20.14  | Rehab            | Extubated         | 1 | 0 | 0 | 0  | 0   | 70    | 209   | 30   |
| 112 | ICU      | 11/1/14  | 11/5/14  | 71 - 80  | 10/31/14 | 10/31/14 | 10/31/14                      | Upper GI bleed                                  | Diverticulitis<br>Colovaginal fistula<br>Acute blood loss anemia<br>Mallory-weiss tear<br>Esophageal varices<br>Diabetes<br>UTI<br>CHF<br>Thrombocytopenia                                                       | Last 30 days | Current | Insulin<br>Anticoagulants            | Antibiotics                                      | Floor            | 11/10/14  | Deceased         | Extubated         | 0 | 0 | 0 | 0  | 0   | 64    | 172.9 | 29.6 |
| 113 | SIU      | 5/25/15  | 6/4/15   | 71 - 80  | 5/24/15  | 5/24/15  | 5/24/15                       | Acute Abdomen                                   | AAA<br>CA bladder<br>CAD<br>Kidney Disease<br>Neuropathy                                                                                                                                                         | Unknown      | no      | unknown                              |                                                  | Floor            | 6/19/15   | Rehab            | Extubated         | 0 | 1 | 0 | 0  | 0   | 69    | 160   | 23.6 |
| 114 | MCU      | 11/4/14  | 11/8/14  | 81 - 90  | 11/2/14  | 11/2/14  | 11/2/14                       | s/p PEA arrest                                  | Interstitial lung disease<br>CHF<br>Hypertension<br>Chronic kidney disease<br>Diabetes<br>Hyperlipidemia<br>Hypothyroidism<br>Lumbar radiculopathy                                                               | 30-90 days   | Never   | Statins<br>Insulin                   | Antibiotics                                      | Deceased         | 11/7/14   | Deceased         | CMO               | 0 | 0 | 1 | 0  | 0   | 62    | 145.2 | 26.8 |
| 115 | MCU      | 11/6/14  | 11/8/14  | 81 - 90  | 11/5/14  | 11/5/14  | 11/5/14                       | Acute hypoxemic respiratory failure/Shock       | Hip fixation surgery<br>Myelofibrosis<br>Chronic anemia<br>CAD<br>Hypertension<br>Afib<br>CHF<br>GERD                                                                                                            | Last 30 days | Current | Anticoagulants                       |                                                  | Deceased         | 11/10/14  | Deceased         | Extubated         | 0 | 0 | 0 | 0  | 0   | 64    | 113.5 | 19.4 |

|     |      |          |          |         |          |          |                                    |                                              |                                                                                                                                                                              |                |          |                                                              |                                       |          |                                             |              |            |   |   |   |   |    |       |       |       |      |
|-----|------|----------|----------|---------|----------|----------|------------------------------------|----------------------------------------------|------------------------------------------------------------------------------------------------------------------------------------------------------------------------------|----------------|----------|--------------------------------------------------------------|---------------------------------------|----------|---------------------------------------------|--------------|------------|---|---|---|---|----|-------|-------|-------|------|
| 116 | ICU  | 11/6/14  | 11/19/14 | 61 - 70 | 11/6/14  | 11/6/14  | 11/6/14                            | Hemorrhagic shock/GI bleed                   | Cryptogenic cirrhosis<br>Anemia<br>Hypothyroidism<br>Rectal cancer<br>Diverticulitis<br>Inguinal hernia<br>s/p TIPS                                                          | >1 year        | Never    |                                                              |                                       | Deceased | 11/19/14                                    | Deceased     | CMO        | 1 | 0 | 1 | 0 | 0  | 0     | 62    | 158.4 | 29.2 |
| 117 | ICU  | 11/9/14  | 11/11/14 | 61 - 70 | 11/8/14  | 11/8/14  | 11/8/14                            | Acute respiratory failure/unresponsive       | CAD<br>STEMI s/p stent placement<br>CHF<br>Hypertension<br>Hyperlipidemia<br>COPD                                                                                            | >1 year        | Never    | Statins                                                      | Antibiotics<br>Immunosupp<br>ressants | Floor    | 11/13/14                                    | Rehab        | Extubated  | 0 | 1 | 0 | 0 | 0  | 0     | 65    | 207.2 | 34.6 |
| 118 | SICU | 11/10/14 | 11/15/14 | 61 - 70 | 11/4/14  | 11/4/14  | Polytrauma s/p N/A mechanical fall | Lupus<br>PE<br>GERD<br>Afib                  | Unknown                                                                                                                                                                      | Never          | Steroids | Immunosupp<br>ressants                                       |                                       | 12/4/14  | Acute Rehab                                 | Tracheostomy | 0          | 0 | 0 | 0 | 1 | 0  | 67    | 114.4 | 18    |      |
| 119 | ICU  | 5/27/15  | 5/28/15  | 61 - 70 | 5/26/15  | 5/26/15  | 5/26/15                            | A-fib                                        | DM type II<br>Diabetic Nephropathy<br>HTN<br>Metastatic CA Breast<br>Paroxysmal A-fib<br>CAD<br>GOUT<br>CKD on HD<br>Pulmonary HTN                                           | Unknown        | Never    | Amiodrone<br>Insulin<br>Statin<br>Anticoagulant<br>Denosumab | Floor                                 | 5/30/15  | Home                                        | Extubated    | 0          | 0 | 0 | 0 | 0 | 0  | 61    | 152   | 28.7  |      |
| 120 | SICU | 11/12/14 | 11/14/14 | 61 - 70 | 11/11/14 | 11/12/14 | 11/12/14                           | Parastomal hernia                            | COPD<br>CHF<br>Diabetes<br>Hypertension<br>Anemia<br>Chronic kidney disease<br>Right colon cancer                                                                            | >1 year        | Unknown  | Statins<br>Antibiotics                                       | Antibiotics<br>Floor                  | 11/17/14 | Home                                        | Extubated    | 0          | 0 | 0 | 1 | 0 | 0  | 69    | 235.4 | 34.9  |      |
| 121 | SICU | 11/12/14 | 11/22/14 | 51 - 60 | 11/11/14 | 11/11/14 | 11/11/14                           | Polytrauma                                   | Hypertension<br>Depression                                                                                                                                                   | Unknown        | Never    |                                                              | Antibiotics                           |          | 11/26/14                                    | Home         | Extubation | 0 | 1 | 0 | 1 | 1  | 69    | 260.7 | 38.7  |      |
| 122 | MICU | 5/27/15  | 5/28/15  | 81 - 90 | 5/25/15  | 5/25/15  | 5/25/15                            | Bilateral Pneumonia                          | COPD<br>DM<br>A-fib<br>Subdural Hygroma<br>CO2 Retention<br>CHF<br>Subdural Hematoma<br>Hyperlipidemia<br>Depression<br>Emphysema<br>CA Prostate                             | Unknown        | yes      | Steroid<br>Anticoagulation<br>Insulin                        | Floor                                 | 6/1/15   | Nursing Home                                | Extubation   | 0          | 0 | 1 | 0 | 0 | 67 | 226   | 35.4  |       |      |
| 123 | SICU | 11/13/14 | 11/22/14 | 81 - 90 | 10/30/14 | 11/12/14 | 11/12/14                           | Extruding bowel through defect               | Colon resection 1 year ago                                                                                                                                                   | >1 year        | Unknown  | Steroids                                                     | Antibiotics<br>Immunosupp<br>ressants |          | 12/4/14                                     | Rehab        | Extubation | 0 | 0 | 0 | 1 | 0  | 70    | 187.7 | 26.9  |      |
| 124 | SICU | 11/13/14 | 11/24/14 | 51 - 60 | 11/10/14 | 11/10/14 | 11/10/14                           | Ruptured aneurysm                            | Unknown                                                                                                                                                                      | Unknown        | Never    | Unknown                                                      | Antibiotics<br>Immunosupp<br>ressants |          | 12/8/14                                     | Rehab        | Extubation |   |   |   |   | 1  | 70    | 149.6 | 22.7  |      |
| 125 | SICU | 11/14/14 | 11/24/14 | 71 - 80 | 11/12/14 | 11/12/14 | 11/13/14                           | Oral cavity bleeding                         | Hyperlipidemia<br>Hypothyroidism<br>Anxiety<br>Basal cell carcinoma of nose<br>Benign prostatic hyperplasia<br>Prostate cancer<br>Epiglottic cancer<br>Base of tongue cancer | >1 year        | Unknown  | Probiotics                                                   | Antibiotics                           |          | 11/28/14                                    | Rehab        | Extubation | 0 | 0 | 1 | 0 | 0  | 73    | 150   | 19.9  |      |
| 126 | SICU | 11/14/14 | 11/19/14 | 41 - 50 | 11/4/14  | 11/4/14  | 11/14/14                           | Pancreatitis/ascites                         | Hypothyroidism<br>Hypertension<br>Hyperlipidemia<br>Diabetes<br>Alcohol cirrhosis                                                                                            | Last 30 days   | Never    | Insulin<br>Antibiotics                                       |                                       | Deceased | 11/19/14                                    | Deceased     | CMO        | 1 | 0 | 0 | 0 | 0  | 65    | 177.1 | 29.6  |      |
| 127 | SICU | 11/15/14 | 11/16/14 | 71 - 80 | 11/13/14 | 11/14/14 | 11/14/14                           | Ventral hernia repair                        | COPD<br>OSA<br>Type II diabetes<br>Hypothyroidism                                                                                                                            | 30-90 days     |          | Insulin<br>Statins                                           | Antibiotics<br>Floor                  |          | 11/24/14                                    | Home w/VNA   | Extubated  | 0 | 0 | 1 | 1 | 0  | 63    | 246.6 | 43.8  |      |
| 128 | ICU  | 11/16/14 | 11/27/14 | 61 - 70 | 11/15/14 | 11/15/14 | 11/15/14                           | Cardiac arrest                               | Prostate cancer w/ bone metastasis<br>DVT<br>Cardiomyopathy<br>s/p cholecystectomy<br>Aspiration PNA                                                                         | 90 days-1 year | Unknown  | Anticoagulants<br>Chemotherapeutics                          |                                       |          | 11/26/14                                    | Rehab        | Extubation | 1 | 1 | 0 | 0 | 0  | 70    | 171.6 | 24.6  |      |
| 129 | MICU | 11/17/14 | 11/27/14 | 61 - 70 | 11/16/14 | 11/16/14 | 11/16/14                           | Myasthenic crisis/Acute respiratory failure  | Myasthenia gravis<br>Type II diabetes<br>Hypertension<br>Hyperlipidemia<br>Chronic venous insufficiency<br>Obesity<br>Micronodular cirrhosis<br>Diverticula                  | Last 30 days   | Never    | Insulin                                                      | Immunosupp<br>ressants                |          | Long-term assisted care<br>12/5/14 facility | Tracheostomy | 0          | 0 | 0 | 0 | 0 | 64 | 204.6 | 35    |       |      |
| 130 | MICU | 11/18/14 | 11/27/14 | 51 - 60 | 11/17/14 | 11/17/14 | 11/13/14                           | Septic shock/bacteremia                      | Seizure disorder                                                                                                                                                             | Unknown        | Never    |                                                              | Antibiotics                           |          | 11/27/14                                    | Deceased     | CMO        | 1 | 1 | 0 | 0 | 0  | 69    | 193.6 | 28.7  |      |
| 131 | SICU | 11/20/14 | 11/26/14 | 71 - 80 | 11/17/14 | 11/17/14 | 11/18/14                           | Septic shock/colitis/AKI/acidosis            | Chronic kidney disease<br>Ulcerative colitis<br>Anemia<br>Optic atrophy<br>Hypertension                                                                                      | <30 days       | Current  | Anticoagulants                                               | Antibiotics<br>Floor                  |          | Long term care<br>12/12/14 facility         | Extubated    | 0          | 0 | 0 | 1 | 0 | 59 | 145   | 29.7  |       |      |
| 132 | SICU | 11/22/14 | 11/26/14 | 51 - 60 | 11/10/14 | 11/22/14 | 11/22/14                           | Hypoxia and new large left PE                | Hep C cirrhosis<br>Depression                                                                                                                                                | Unknown        | Never    | Omeprazole                                                   | Antibiotics<br>Floor                  |          | 12/22/14                                    | Rehab        | Extubated  | 1 | 0 | 0 | 1 | 0  | 61    | 145   | 27.4  |      |
| 133 | ICU  | 11/24/14 | 12/3/14  | 31 - 40 | 11/21/14 | 11/21/14 | 11/21/14                           | Acute respiratory failure/status epilepticus | ETOH abuse<br>Seizure disorder                                                                                                                                               | Unknown        | Never    |                                                              | Antibiotics<br>Floor                  |          | 12/11/14                                    | Rehab        | Extubated  | 1 | 1 | 0 | 0 | 0  | 62    | 134.6 | 24.6  |      |
| 134 | MICU | 5/28/15  | 6/14/15  | 41 - 50 | 5/27/15  | 5/27/15  | 5/27/15                            | GI bleed                                     | Viral Hepatitis<br>Cirrhosis<br>ETOH Abuse<br>Varices<br>COPD                                                                                                                | 1 year         | unknown  | Steroid                                                      |                                       | Deceased | 6/14/15                                     | Deceased     | CMO        | 1 | 1 | 0 | 0 | 0  | 70    | 242   | 34.7  |      |
| 135 | MICU | 5/28/15  | 5/29/15  | 41 - 50 | 5/27/15  | 5/27/15  | 5/27/15                            | Seizures                                     | Seizures<br>PTSD<br>GERD<br>ETOH Abuse<br>Pancreatitis                                                                                                                       | 30 days        | Never    | Unknown                                                      |                                       | Floor    | 6/11/15                                     | Home         | Extubated  | 0 | 1 | 0 | 0 | 0  | 72    | 165   | 22.4  |      |

|     |      |          |          |         |          |          |            |                                                         |                                                                                                                                                                                                                                                                                     |                   |         |                                   |                                       |                                  |                   |           |       |       |      |       |       |       |       |      |
|-----|------|----------|----------|---------|----------|----------|------------|---------------------------------------------------------|-------------------------------------------------------------------------------------------------------------------------------------------------------------------------------------------------------------------------------------------------------------------------------------|-------------------|---------|-----------------------------------|---------------------------------------|----------------------------------|-------------------|-----------|-------|-------|------|-------|-------|-------|-------|------|
| 136 | MICU | 5/30/15  | 5/31/15  | 61 - 70 | 5/29/15  | 5/29/15  | 5/29/15    | Respiratory Failure                                     | pneumonia<br>Pleural effusion<br>GERD                                                                                                                                                                                                                                               | 30-90 days        | no      | insulin<br>Nicotine Patch         | Floor                                 | Long Term Acute<br>care Facility | Extubated         | 0         | 1     | 68    | 173  | 26.3  |       |       |       |      |
| 137 | MICU | 11/26/14 | 12/1/14  | 81 - 90 | 11/25/14 | 11/26/15 | 11/26/14   | Acute respiratory<br>failure                            | Diastolic heart failure<br>Afib<br>Chronic pain syndrome<br>Rheumatoid arthritis<br>GERD<br>Hyperlipidemia<br>Upper GI bleed                                                                                                                                                        | 90 days-1yr       | Never   | Anticoagulants<br>Pain medication | Antibiotics<br>Floor                  | Skilled nursing<br>facility      | Extubated         | 0         | 0     | 0     | 0    | 0     | 59    | 204.6 | 41.3  |      |
| 138 | ICU  | 11/28/14 | 11/30/14 | 18 - 30 | 11/27/14 | 11/27/14 | 11/27/14   | Change in mental<br>status/AKI                          | Unknown, substance<br>abuse                                                                                                                                                                                                                                                         | Unknown           | Unknown | Unknown                           | Antibiotics<br>Floor                  | 12/3/14 Home                     | Extubated         | 0         | 0     | 72    | 202  | 27.5  |       |       |       |      |
| 139 | SICU | 6/18/15  | 6/25/15  | 71 - 80 | 6/17/15  | 6/17/15  | 6/17/15    | Subdural Hematoma                                       | Unknown                                                                                                                                                                                                                                                                             | Unknown           | Unknown | Anticoagulation<br>Statin         | Deceased                              | 6/25/15 Deceased                 | CMO               | 0         | 0     | 0     | 0    | 0     | 73    | 155   | 20.4  |      |
| 140 | MICU | 11/28/14 | 12/11/14 | 51 - 60 | 11/23/14 | 11/26/14 | 11/26/14   | Hypercalcemia/right<br>sided neoplasm                   | Obesity                                                                                                                                                                                                                                                                             | Unknown           | Never   |                                   | Antibiotics<br>Immunosupp<br>ressants | Deceased                         | 12/11/14 Deceased | CMO       | 0     | 1     | 60   | 206.8 | 40.7  |       |       |      |
| 141 | MICU | 11/28/14 | 12/5/14  | 71 - 80 | 11/27/14 | 11/27/14 | 11/27/14   | Trauma s/p fall                                         | Breast cancer w/<br>metastasis to liver and<br>lungs<br>Sciatica<br>Hypertension<br>Diabetes                                                                                                                                                                                        | 30-90 days        | Never   | Pain medication                   | Hospital transfer                     | 12/4/14 Hospital transfer        | Hospital transfer | 0         | 0     | 0     | 0    | 1     | 65    | 171.6 | 28.7  |      |
| 142 | ICU  | 11/29/14 | 12/1/14  | 61 - 70 | 11/28/14 | 11/28/14 | 11/28/14   | Acute respiratory<br>failure/Septic shock               | End stage renal disease<br>Cervical laminectomy<br>Hypertension<br>Hyperlipidemia<br>Diabetes type II<br>Anxiety<br>Depression<br>GERD<br>Colovaginal fistula<br>s/p colostomy<br>CAD<br>Heart failure s/p<br>pacemaker                                                             | 90 days-1<br>year | Current | Anticoagulants<br>Pain medication | Antibiotics<br>Floor                  | Skilled nursing<br>facility      | Extubated         | 0         | 0     | 1     | 0    | 0     | 63    | 140   | 24.8  |      |
| 143 | MICU | 11/29/14 | 12/5/14  | 51 - 60 | 11/29/14 | 11/29/14 | 11/19/14 v | Acute respiratory<br>failure/encephalopath<br>cirrhosis | Genotype 1a hepatitis C<br>cirrhosis                                                                                                                                                                                                                                                | 90 days-1<br>year | Never   | Pain medication                   | Floor                                 | 12/9/14 Home                     | Extubated         | 0         | 1     | 71    | 231  | 32.4  |       |       |       |      |
| 144 | ICU  | 11/30/14 | 12/2/14  | 81 - 90 | 11/26/14 | 11/30/14 | 11/30/14   | s/p fall/acute renal<br>failure/right PE                | CAD w/ LAD stent<br>CHF<br>Afib<br><br>Multiple falls/contusions<br><br>Right bundle branch block<br>Hypertension<br>Patent foramen ovale<br>Chronic kidney disease<br><br>Myelodysplastic anemia<br><br>Subarachnoid hemorrhage<br>Hiatal hernia<br>Spinal stenosis<br>Gout<br>BPH | 30-90 days        | Never   | Statins                           | Floor                                 | 12/17/14 Home with VNA           | Extubated         | 0         | 0     | 0     | 1    | 1     | 66    | 172.7 | 27.8  |      |
| 145 | ICU  | 11/30/14 | 12/20/14 | 51 - 60 | 11/29/14 | 11/29/14 | 11/29/14   | s/p Cardiac arrest                                      | Diabetes Type I<br>Hyperlipidemia<br>Chronic back pain<br>Hypertension<br>Retinopathy                                                                                                                                                                                               | Unknown           | Never   | Statins<br>Insulin                | Deceased                              | 12/20/14 Deceased                | CMO               | 1         | 0     | 0     | 0    | 69    | 169.4 | 25    |       |      |
| 146 | SICU | 11/30/14 | 12/12/14 | 81 - 90 | 11/29/14 | 11/30/14 | 11/30/14   | Subarachnoid<br>hemorrhage s/p fall                     | Hypertension<br>Hypercholesterolemia<br>Afib<br>Appendectomy<br>Cholecystectomy<br>Hysterectomy<br>CHF                                                                                                                                                                              | Unknown           | Unknown | Lopressor                         | Deceased                              | 12/12/14 Deceased                | CMO               | 1         | 58    | 207.9 | 43.7 |       |       |       |       |      |
| 147 | SICU | 11/30/14 | 12/3/14  | 71 - 80 | 11/26/14 | 11/29/14 | 11/29/14   | Small bowel<br>obstruction                              | Hypertension<br><br>Hypothyroidism<br>Rheumatoid arthritis<br>Diverticulitis<br>Diabetes                                                                                                                                                                                            | >1 year           | Unknown | Steroids                          | Antibiotics<br>Immunosupp<br>ressants | Floor                            | 12/9/14 Rehab     | Extubated | 0     | 0     | 0    | 1     | 0     | 62    | 259.2 | 47.8 |
| 148 | SICU | 12/1/14  | 12/12/14 | 61 - 70 | 11/28/14 | 11/28/14 | 11/30/14   | Spinal cord<br>hemorrhage                               | Pancytopenia<br>Hepatitis C<br>Porphyria cutanea<br>Upper GI bleed                                                                                                                                                                                                                  | Unknown           | Unknown |                                   | Deceased                              | 12/17/14 Deceased                | Tracheostomy      | 1         | 1     | 0     | 0    | 0     | 72    | 176.4 | 23.9  |      |
| 149 | SICU | 12/5/14  | 12/14/14 | 61 - 70 | 12/1/14  | 12/4/14  | 12/4/14    | Elective urinary<br>diversion                           | CAD<br><br>Peripheral vascular disease<br>Cervical cancer<br>ARDS<br>Hypothyroidism<br>Urinary incontinence<br>GERD<br>Peripheral neuropathy<br>Cervical radiculopathy<br>Vitamin B12 deficiency<br>Hyperlipidemia<br>Hypertension<br>Laparoscopic<br>cholecystectomy               | Unknown           | Unknown | Statins                           | Antibiotics<br>Floor                  | 12/20/14 Rehab                   | Extubated         | 64        | 160.6 | 27.5  |      |       |       |       |       |      |
| 150 | SICU | 12/3/14  | 12/12/14 | 61 - 70 | 12/2/14  | 12/2/14  | 12/3/14    | Pneumonia/Sepsis                                        | Hemochromatosis and<br>Hepatopulmonary<br>syndrome s/p liver donor<br>transplant in 2007<br>Bilateral ORIF<br>Right middle lobe<br>adenocarcinoma<br>Recurrent upper left lobe<br>pneumonia<br>Diabetes type II<br>Hypertension<br>Asthma<br>C.diff colitis<br>Tonsillectomy        | >1 year           | Never   | Lopressor<br>Pain medication      | Antibiotics<br>Rehab                  | 12/17/14 Rehab                   | Tracheostomy      | 0         | 0     | 1     | 0    | 0     | 62    | 137.7 | 25.4  |      |



|     |      |          |          |         |          |          |          |                                                         |                                                                                                                                                                                             |                   |              |                                                                 |                                           |                         |                         |                |           |   |   |   |    |       |       |       |      |
|-----|------|----------|----------|---------|----------|----------|----------|---------------------------------------------------------|---------------------------------------------------------------------------------------------------------------------------------------------------------------------------------------------|-------------------|--------------|-----------------------------------------------------------------|-------------------------------------------|-------------------------|-------------------------|----------------|-----------|---|---|---|----|-------|-------|-------|------|
| 151 | MICU | 12/6/14  | 12/9/14  | 61 - 70 | 12/5/14  | 12/5/14  | 12/5/14  | Acute respiratory failure/Encephalopathy                | Breast cancer w/ wide spread metastasis                                                                                                                                                     | 30-90 days        | Never        | Chemotherapeutics                                               | Antibiotics<br>Immunosupp<br>ressants     | Floor                   | 12/30/14                | Hospice        | Extubated | 0 | 0 | 0 | 63 | 141.7 | 25.2  |       |      |
| 152 | ICU  | 12/3/14  | 12/10/14 | 41 - 50 | 12/2/14  | 12/2/14  | 12/2/14  | Anterior wall STEM/cardiogenic shock                    | Upper extremity abscess                                                                                                                                                                     | Unknown           | Unknown      | None                                                            |                                           | Floor                   | 12/17/14                | Home           | Extubated | 0 | 1 | 0 | 0  | 70    | 180.4 | 25.9  |      |
| 153 | SICU | 12/7/14  | 12/9/14  | 71 - 80 | 12/3/14  | 12/3/14  | 12/6/14  | Elective ureteroscopy<br>cytoscopy laser lithotripsy    | Hypertension<br>Dyslipidemia<br><br>Symptomatic bradycardia treated with pacemaker<br>BPH<br>Seizure disorder<br>Mild Parkinson's<br>Hyperthyroidism                                        | <30 days          | Never        | Statins                                                         | Immunosupp<br>ressants                    | Floor                   | 12/15/14                | Rehab          | Extubated | 1 | 0 | 0 | 1  | 64    | 174.9 | 29.9  |      |
| 154 | SICU | 6/2/15   | 6/4/15   | 61 - 70 | 6/1/15   | 6/1/15   | 6/1/15   | Carcinoma Tongue                                        | Asthma<br>COPD<br>HTN<br>Hyperlipidemia<br>A-fib and flutter<br>Arthritis<br>polycythemia                                                                                                   | less than 30 days | Never        | Unknown                                                         |                                           | Floor                   | 6/9/15                  | Home with Care | Extubated | 1 | 0 | 1 | 0  | 69    | 212   | 31.3  |      |
| 155 | MICU | 12/7/14  | 12/16/14 | 71 - 80 | 12/3/14  | 12/3/14  | 12/6/14  | Respiratory distress/Fever                              | Hypothyroidism<br><br>Cholecystectomy s/p colon resection for cancer<br>AML                                                                                                                 | <30 days          | Never        |                                                                 |                                           | Deceased                | 12/16/14                | Deceased       | CMO       | 0 | 0 | 0 | 0  | 62    | 194   | 35.8  |      |
| 156 | ICU  | 12/8/14  | 12/14/14 | 41 - 50 | 12/8/14  | 12/8/14  | 12/8/14  | Right sided weakness/facial droop                       | Hypertension<br>Depression<br>ETOH abuse                                                                                                                                                    | Unknown           | Never        | Lopressor                                                       |                                           | Deceased                | 12/14/14                | Deceased       | CMO       | 1 | 0 | 0 | 0  | 62    | 220   | 40.6  |      |
| 157 | MICU | 12/10/14 | 12/12/14 | 61 - 70 | 12/9/14  | 12/9/14  | 12/9/14  | Acute respiratory failure/Shock                         | Hypertension<br>Chronic kidney disease 2/2<br>diabetes<br>Hyperlipidemia                                                                                                                    | Unknown           | Never        | Lopressor<br><br>Insulin                                        |                                           | Floor                   | 12/23/14                | Rehab          | Extubated | 1 | 0 | 0 | 1  | 66    | 106.7 | 17.2  |      |
| 158 | MICU | 6/3/15   | 6/14/15  | 71 - 80 | 5/29/15  | 6/2/15   | 6/3/15   | Aphasia                                                 | Colectomy                                                                                                                                                                                   | Unknown           | not before   |                                                                 |                                           | Floor                   | 6/19/15                 | Nursing Home   | Extubated | 1 | 0 | 1 | 0  | 72    | 213   | 28.9  |      |
| 159 | SICU | 12/13/14 | 12/15/14 | 81 - 90 | 12/9/14  | 12/9/14  | 12/9/14  | Polytrauma                                              | Type II Diabetes<br>Hypertension<br>GERD<br>Anemia                                                                                                                                          | Unknown           | Unknown      | Hypoglycemics                                                   | Antibiotics                               | Floor                   | 12/23/14                | Rehab          | Extubated |   |   |   |    | 62    | 169.4 | 31.2  |      |
| 160 | MICU | 12/15/14 | 12/17/14 | 61 - 70 | 12/15/14 | 12/15/14 | 12/15/14 | Acute respiratory failure/Sepsis                        | COPD<br>Type II Diabetes<br>Hypertension<br>Lung nodule that is PET positive                                                                                                                | >1year            | Never        | Statins<br>hypoglycemics                                        |                                           | Floor                   | 12/20/14                | Home           | Extubated | 0 | 0 | 1 | 0  | 66    | 156   | 25.2  |      |
| 161 | MICU | 12/16/14 | 12/21/14 | 51 - 60 | 12/15/14 | 12/16/14 | 12/16/14 | Right basal ganglia hemorrhage                          | Unknown                                                                                                                                                                                     | Unknown           | Unknown      |                                                                 |                                           | Deceased                | 12/21/14                | Deceased       | CMO       |   |   |   |    | 70    | 226.6 | 32.5  |      |
| 162 | MICU | 6/3/15   | 6/7/15   | 71 - 80 | 5/29/15  | 6/3/15   | 6/3/15   | Hip Fracture                                            | Asthma<br>Carcinoma kidney<br>Heart Transplant<br>Arthritis<br>DM<br>GERD<br>HTN<br>Diabetic Nephropathy<br>CHF                                                                             | less than 30 days | Never        | Statins<br>Immunosuppressant                                    |                                           | Deceased                | 6/7/15                  | Deceased       | CMO       | 1 | 0 | 1 | 0  | 67    | 145   | 22.7  |      |
| 163 | ICU  | 12/19/14 | 12/24/14 | 51 - 60 | 12/12/14 | 12/16/14 | 12/17/14 | Altered mental status/Acute kidney injury               | Large C-cell lymphoma w/ renal involvement<br><br>Left third nerve paralysis and right brachial plexus<br>Type II diabetes<br>Hyperlipidemia<br>Gout<br>Hypertension<br>Anemia              | 90days-1year      | Never        |                                                                 | Antibiotics<br><br>Immunosupp<br>ressants | Deceased                | 12/25/14                | Deceased       | CMO       | 0 | 0 | 0 | 0  | 74    | 308   | 39.2  |      |
| 164 | SICU | 12/21/14 | 1/8/15   | 51 - 60 | 12/17/14 | 12/20/14 | 12/19/14 | Right lower extremity ischemia and non dopplable pulses | Diabetes<br>Hypertension<br>CAD<br>Hyperlipidemia<br>COPD<br>Diabetic Retinopathy<br>OSA<br><br>Peripheral vascular disease                                                                 | >1 year           | Unknown      | Statins<br>Antibiotics<br>Insulin<br>Steroids<br>Anticoagulants |                                           | Long term care facility | Long term care facility | Tracheostomy   | 1         | 0 | 1 | 1 | 0  | 68    | 264   | 40.1  |      |
| 165 | MICU | 12/21/14 | 12/23/14 | 61 - 70 | 12/20/14 | 12/20/14 | 12/20/14 | Hypoxic respiratory failure/Shock                       | COPD<br><br>Electrolyte abnormalities 2/2<br>SIADH<br>ETOH hepatitis                                                                                                                        | <30 days          | Unknown      | Vasopressors                                                    |                                           | Floor                   | Long term care facility | 1/22/15        | Extubated | 1 | 0 | 1 | 0  | 66    | 136.4 | 22    |      |
| 166 | MICU | 12/27/14 | 1/1/15   | 51 - 60 | 12/26/15 | 12/26/15 | 12/26/14 | Acute renal failure/Shock                               | End stage liver disease 2/2<br>ETOH cirrhosis<br>Esophageal variceal bleeding<br>Portosystemic encephalopathy<br>Chronic ascites and peripheral edema                                       | 90days-1year      | Never        |                                                                 | Antibiotics                               | Floor                   | Long term care facility | 2/11/15        | Extubated | 1 | 0 | 1 | 1  | 0     | 71    | 338.8 | 47.5 |
| 167 | ICU  | 12/28/14 | 1/7/15   | 51 - 60 | 12/7/14  | 12/26/14 | 12/27/14 | Purulent discharge                                      | SLE<br><br>Rheumatoid arthritis<br>Glaucoma<br>Hyperlipidemia<br>Hypertension<br>Depression<br><br>Iga lambda and kappa monoclonal gammopathy<br>s/p cholecystectomy<br>s/p appendectomy x2 | Unknown           | Never        | Statins                                                         | Antibiotics<br>Immunosupp<br>ressants     | Floor                   | 1/15/15                 | Rehab          | Extubated | 0 | 0 | 1 | 1  | 0     | 64    | 242   | 41.4 |
| 168 | MICU | 12/28/14 | 1/1/15   | 71 - 80 | 12/26/14 | 12/28/14 | 12/28/14 | Community acquired pneumonia                            | CAD s/p CABG<br>Hypertension<br>Dyslipidemia                                                                                                                                                | >1 year           | Unknown      | Lopressor                                                       | Antibiotics                               | Deceased                | 12/30/14                | Deceased       | CMO       | 0 | 0 | 1 | 1  | 0     | 65    | 227.7 | 38   |
| 169 | SICU | 12/29/14 | 1/6/15   | 61 - 70 | 12/27/14 | 12/27/14 | 12/28/14 | Trauma s/p MVA                                          | Type II Diabetes                                                                                                                                                                            | 90days-1year      | Last 30 days | Statins                                                         |                                           | Rehab                   | 1/13/15                 | Rehab          | Extubated | 1 | 0 | 1 | 0  | 1     | 66    | 165.3 | 26.7 |

|     |      |          |         |         |          |          |             |                                                         |                                                                                                                                                                                              |                   |              |                                                      |                                       |                         |                         |                          |              |           |   |   |   |    |       |       |       |      |
|-----|------|----------|---------|---------|----------|----------|-------------|---------------------------------------------------------|----------------------------------------------------------------------------------------------------------------------------------------------------------------------------------------------|-------------------|--------------|------------------------------------------------------|---------------------------------------|-------------------------|-------------------------|--------------------------|--------------|-----------|---|---|---|----|-------|-------|-------|------|
|     |      |          |         |         |          |          | Afib<br>CVA |                                                         |                                                                                                                                                                                              | Anticoagulants    |              |                                                      |                                       |                         |                         |                          |              |           |   |   |   |    |       |       |       |      |
| 170 | ICU  | 12/29/14 | 1/12/15 | 51 - 60 | 12/29/14 | 12/29/14 | 12/29/14    | Acute hypoxemic respiratory failure/Shock               | CHF<br>Nons ischemic cardiomyopathy<br>Afib<br>COPD<br>Hypothyroidism<br>Dyslipidemia<br>Obesity<br>CKD<br>Chronic right pleural effusion<br>OSA<br>Gout<br>Lymphadenopathy and splenomegaly | Unknown           | Never        | Anticoagulants                                       |                                       | Floor                   | Long term care facility | 1/30/15                  | Deceased     | Extubated | 0 | 0 | 0 | 1  | 0     | 66    | 264   | 42.5 |
| 171 | ICU  | 1/1/15   | 1/4/15  | 71 - 80 | 12/27/14 | 12/31/14 | 12/31/14    | Left hydropneumothorax                                  | Head and neck cancer<br>Diabetes<br>Pneumonia<br>Dysphagia 2/2 head and neck cancer<br>BPH<br>s/p pancreaticectomy<br>Left leg DVT                                                           | Unknown           | Never        | Insulin<br>Immunosuppressants                        | Antibiotics<br>Immunosupp<br>ressants | Deceased                | 1/3/15                  | Deceased                 | CMO          | 1         | 0 | 1 | 0 | 0  | 72    | 165   | 22.4  |      |
| 172 | MICU | 12/30/14 | 1/22/15 | 71 - 80 | 12/30/14 | 12/30/14 | 12/30/14    | Altered mental status and hypoxemia                     | Epilepsy<br>CAD<br>BPH<br>Anxiety<br>Pneumonia<br>Ulcerative colitis                                                                                                                         | Unknown           | Unknown      | Statins                                              |                                       | Deceased                | 1/22/15                 | Deceased                 | CMO          |           |   | 0 | 0 | 70 | 164.6 | 23.6  |       |      |
| 173 | SICU | 12/30/14 | 1/4/15  | 71 - 80 | 12/28/14 | 12/29/14 | 12/29/14    | Dysphagia                                               | Afib<br>Anemia<br>CHF<br>Dysphagia<br>Esophageal stenosis<br>Gout<br>Arthrosis of the knee<br>Hypertension<br>Psoriasis<br>Cataracts                                                         | Unknown           | Never        | Antibiotics<br>Anticoagulants                        |                                       | Long term care facility | 1/26/15                 | Long term care facility  | Tracheostomy | 0         | 0 | 1 | 1 | 0  | 67    | 198.4 | 31.2  |      |
| 174 | SICU | 12/30/14 | 1/1/15  | 71 - 80 | 12/28/14 | 12/29/14 | 12/29/14    | Change in mental status following mechanical fall       | None known                                                                                                                                                                                   | Unknown           | Unknown      | None                                                 | Antibiotics                           | Floor                   | 1/13/15                 | Skilled nursing facility | Extubated    |           |   | 1 | 1 | 73 | 134.2 | 17.8  |       |      |
| 175 | SICU | 12/30/14 | 1/4/15  | 61 - 70 | 12/27/14 | 12/29/14 | 12/29/14    | Combined systolic and diastolic heart failure/UTI       | CHF<br>Afib<br>Cardiomyopathy<br>Metastatic breast cancer<br>Anemia<br>Metabolic acidosis<br>Chronic renal insufficiency<br>Morbid obesity                                                   | Last 30 days      | Last 30 days | Anticoagulants                                       | Antibiotics                           | Floor                   | 1/8/15                  | Rehab                    | Extubated    | 0         | 0 | 1 | 0 | 0  | 63    | 218.3 | 38.7  |      |
| 176 | SICU | 12/30/14 | 1/4/15  | 31 - 40 | 12/27/14 | 12/29/14 | 12/29/14    | Cellulitis                                              | Type II Diabetes, insulin dependent<br>Bipolar disorder<br>Hyperlipidemia<br>GERD<br>Chronic back pain                                                                                       | Unknown           | Never        | Insulin<br>Statins                                   | Antibiotics                           | Floor                   | 1/7/15                  | Home w/ VNA              | Extubated    | 0         | 1 | 0 | 1 | 0  | 71    | 220   | 30.9  |      |
| 177 | MICU | 1/3/15   | 1/6/15  | 81 - 90 | 1/2/15   | 1/2/15   | 1/2/15      | Dyspnea and GI bleed                                    | CVA and right MCA distribution<br>Seizures<br>Hypertension<br>Hypercholesterolemia<br>COPD<br>Anxiety<br>Enterococcal UTI<br>MRSA positive sputum                                            | Unknown           | Current      | Statins<br>Steroids                                  |                                       | Floor                   | 1/7/15                  | Deceased                 | Extubated    | 0         | 0 | 0 | 0 | 0  | 64    | 149.6 | 25.6  |      |
| 178 | ICU  | 1/3/15   | 1/6/15  | 71 - 80 | 12/31/14 | 1/2/15   | 1/3/15      | New onset atrial flutter and rapid ventricular response | Hyperlipidemia<br>Hypertension<br>Osteoarthritis<br>Trigeminal neuroalgia<br>Open-angle glaucoma                                                                                             | >1 year           | Unknown      | Statins                                              |                                       | Floor                   | 1/14/15                 | Skilled nursing facility | Extubated    | 0         | 0 | 0 | 0 | 0  | 61    | 158.4 | 30    |      |
| 179 | MICU | 6/4/16   | 6/16/15 | 41 - 50 | 5/22/15  | 5/22/15  | 6/3/15      | Altered Mental Status                                   | Epilepsy<br>Concussion<br>Convulsions<br>Spasmodic torticollis<br>Constipation                                                                                                               | Unknown           | Never        | Gabapentin<br>Divalproex                             |                                       | Long term care facility | 7/2/15                  | Long term care facility  | Tracheostomy | 0         | 1 | 0 | 0 | 0  | 62    | 134   | 24.5  |      |
| 180 | MICU | 1/4/15   | 1/7/15  | 41 - 50 | 1/4/15   | 1/4/15   | 1/4/15      | Drug overdose                                           | OCD, Bipolar disorder<br>x2 overdose<br>Cholecystectomy<br>Gastric bypass<br>Hypertension                                                                                                    | >1 year           | Never        | Anticoagulants<br>Antibiotics                        |                                       | Floor                   | 1/16/15                 | Psych hospital           | Extubated    | 1         | 1 | 0 | 0 | 0  | N/A   | 136.4 | N/A   |      |
| 181 | MICU | 6/6/15   | 6/27/15 | 51 - 60 | 5/28/15  | 6/5/15   | 6/5/15      | Sepsis                                                  | HTN<br>Depression<br>Bipolar<br>Thyroid Disease                                                                                                                                              | less than 30 days |              | Antibiotic<br>Topical<br>Divalproex<br>Antiepileptic |                                       | Deceased                | 6/27/15                 | Deceased                 | CMO          | 0         | 1 | 0 | 0 | 0  | 68    | 200   | 30.4  |      |
| 182 | ICU  | 1/7/15   | 1/10/15 | 51 - 60 | 12/30/14 | 1/6/14   | 1/6/15      | Mechanical fall/Acute kidney injury                     | Type II diabetes<br>s/p cholecystectomy<br>Arthritis<br>Right leg superficial thrombophlebitis<br>Right peroneal neuropathy<br>Anxiety/depression<br>Morbid obesity                          | Unknown           | Never        | Insulin<br>Statins                                   | Antibiotics<br>Immunosupp<br>ressants | Floor                   | 1/15/15                 | Rehab                    | Extubated    |           |   | 1 | 0 | 0  | 1     | 66    | 415.6 | 66.9 |
| 183 | ICU  | 1/7/15   | 1/28/15 | 41 - 50 | 1/5/15   | 1/6/15   | 1/6/15      | Panniculitis/Cellulitis/hypersyemia                     | Morbid Obesity<br>GERD<br>Hyperlipidemia<br>Hypertension<br>OSA<br>Type II diabetes                                                                                                          | Unknown           | Never        | Insulin                                              | Antibiotics                           | Long term care facility | 2/6/15                  | Long term care facility  | Tracheostomy | 0         | 0 | 0 | 0 | 0  | 64    | 455.4 | 77.9  |      |
| 184 | MICU | 1/11/15  | 1/15/15 | 41 - 50 | 1/6/15   | 1/6/15   | 1/11/15     | Upper GI bleed                                          | ETOH hepatitis<br>Psoriasis<br>Bipolar                                                                                                                                                       | 30-90 days        | Unknown      |                                                      | Antibiotics                           | Deceased                | 1/14/15                 | Deceased                 | CMO          | 1         |   | 0 | 0 | 0  | 61    | 145.4 | 27.5  |      |

|     |      |         |         |         |         |         |         |                                                                                     |                                                                                                                                                                    |                |         |                                                    |                                       |                         |         |                          |                   |   |   |   |   |   |    |       |       |      |
|-----|------|---------|---------|---------|---------|---------|---------|-------------------------------------------------------------------------------------|--------------------------------------------------------------------------------------------------------------------------------------------------------------------|----------------|---------|----------------------------------------------------|---------------------------------------|-------------------------|---------|--------------------------|-------------------|---|---|---|---|---|----|-------|-------|------|
| 185 | MCU  | 1/11/15 | 1/13/15 | 71 - 80 | 1/10/15 | 1/10/15 | 1/10/15 | Ischemic stroke/Acute respiratory failure                                           | Gout<br>Dyslipidemia<br>Prostate cancer<br>Vitamin D deficiency<br>s/p appendectomy<br>s/p inguinal hernia repair<br>s/p prostatectomy                             | >1 year        | Unknown | Status                                             | Antibiotics                           | Floor                   | 1/14/15 | Home w/ VNA              | Extubated         | 1 | 0 | 1 | 0 | 0 | 0  | 71    | 198   | 27.8 |
| 186 | SICU | 1/12/15 | 2/5/15  | 41 - 50 | 1/12/15 | 1/12/15 | 1/12/15 | Acute respiratory failure/Septic shock                                              | COPD with alpha-1 antitrypsin deficiency<br>Chronic hypoxemic respiratory failure<br>Pleurisy<br>GERD<br>Urinary retention<br>PTSD<br>Orthostatic hypotension      | Last 30 days   | Unknown |                                                    |                                       | Rehab                   | 3/4/15  | Rehab                    | Tracheostomy      |   | 0 | 1 | 1 | 0 | 0  | 62    | 202.4 | 37.3 |
| 187 | MCU  | 6/8/15  | 6/19/15 | 51 - 60 | 6/7/15  | 6/7/15  | 6/7/15  | Seizures                                                                            | EIOH Abuse<br>Depression<br>Mood disorder                                                                                                                          | Unknown        | No      |                                                    |                                       | Floor                   | 6/25/15 | Other Hospital           | Extubated         | 0 | 0 | 0 | 0 | 0 | 0  | 67    | 183   | 28.7 |
| 188 | SICU | 1/16/15 | 1/20/15 | 51 - 60 | 1/14/15 | 1/14/15 | 1/14/15 | Epidural abscess                                                                    | COPD<br>CAD<br>Diabetes<br>Hypertension<br>TIA<br>IV drug abuse                                                                                                    | >1 year        | Unknown | Anticoagulants<br>Insulin                          | Antibiotics                           | Floor                   | 1/29/15 | Rehab                    | Extubated         |   | 1 | 0 |   |   |    | 72    | 237.6 | 32.2 |
| 189 | SICU | 1/17/15 | 1/21/15 | 18 - 30 | 1/13/15 | 1/13/15 | 1/13/15 | Multiple trauma                                                                     | None                                                                                                                                                               | Never          | Never   | None                                               | Antibiotics                           | Floor                   | 2/2/15  | Rehab                    | Extubated         |   |   | 1 | 1 |   |    | 74    | 193.6 | 24.9 |
| 190 | MCU  | 1/17/15 | 1/29/15 | 31 - 40 | 1/15/15 | 1/15/15 | 1/16/15 | Hypercapnic hypoxic respiratory failure                                             | Panniculitis<br>Splenomegaly<br>Diabetes<br>Schizophrenia<br>Hypertension<br>Hyperlipidemia<br>GERD<br>COPD<br>Morbid obesity                                      | >1 year        | Never   | Unknown                                            | Antibiotics<br>Immunosupp<br>ressants | Hospital transfer       | 1/28/15 | Hospital Transfer        | Hospital Transfer | 0 | 1 | 0 | 0 | 0 | 0  | 72    | 494.4 | 67.7 |
| 191 | ICU  | 1/18/15 | 2/1/15  | 71 - 80 | 1/17/15 | 1/17/15 | 1/17/15 | Respiratory failure                                                                 | Bipolar disorder<br>Asthma<br>Hypothyroidism<br>Hypertension<br>Tremor                                                                                             | Unknown        | Never   | Antibiotics                                        | Antibiotics<br>Immunosupp<br>ressants | Floor                   | 2/10/15 | Deceased                 | Extubated         | 0 | 0 | 0 | 0 | 0 | 0  | 65    | 193.6 | 32.3 |
| 192 | SICU | 1/19/15 | 1/22/15 | 51 - 60 | 1/18/15 | 1/18/15 | 1/18/15 | Sigmoid volvulus s/p colonoscopic decompression<br>Autism<br>Constipation<br>Asthma | Sigmoid volvulus s/p colonoscopic decompression<br>Autism<br>Constipation<br>Asthma                                                                                | >1 year        | Current |                                                    | Antibiotics                           | Floor                   | 1/29/15 | Back to group home       | Extubated         |   |   | 1 | 0 |   |    | 69    | 176   | 26.1 |
| 193 | SICU | 6/9/15  | 6/10/15 | 61 - 70 | 5/28/15 | 6/8/15  | 6/8/15  | Wound Dehiscence                                                                    | CHF<br>CAD<br>DM<br>HTN<br>CKD                                                                                                                                     | less than 30 i | no      | Statin<br>Antibiotic<br>Insulin<br>Anticoagulation |                                       | Deceased                | 6/10/15 | Deceased                 | Deceased          | 0 | 0 | 1 | 1 | 1 | 1  | 71    | 218   | 30.4 |
| 194 | ICU  | 1/22/15 | 1/24/15 | 71 - 80 | 1/21/15 | 1/21/15 | 1/21/15 | Acute massive pulmonary emboli/Acute respiratory failure                            | Lewy body dementia<br>Right acute subdural hematoma<br>Left lower extremity DVT<br>Hyponatremia<br>UTI                                                             | >1 year        | Never   |                                                    | Antibiotics                           | Deceased                | 1/23/15 | Deceased                 | CMO               | 0 | 0 | 1 | 0 | 0 | 0  | 62    | 132   | 24.3 |
| 195 | SICU | 1/29/15 | 2/7/15  | 71 - 80 | 1/3/15  | 1/27/15 | 1/28/15 | Large bowel obstruction                                                             | Hypothyroidism<br>GERD                                                                                                                                             | >1 year        | Unknown |                                                    | Antibiotics                           | Floor                   | 2/27/15 | Home                     | Extubated         | 0 | 0 | 1 | 1 | 0 | 0  | 67    | 158.6 | 24.9 |
| 196 | SICU | 1/31/15 | 2/14/15 | 51 - 60 | 1/26/15 | 1/26/15 | 1/29/15 | Cystectomy and ileal loop                                                           | Hypertension<br>Chronic kidney disease s/p transplant in 2002<br>Hypothyroidism<br>Seizure disorder<br>Anemia<br>BKA nephropathy<br>Bladder cancer                 | Never          | Unknown | Immunosuppressants                                 | Antibiotics                           | Long term care facility | 2/18/15 | Long term care facility  | Tracheostomy      | 0 | 0 | 1 | 0 | 0 | 65 | 123.2 | 20.6  |      |
| 197 | SICU | 2/1/15  | 2/4/15  | 61 - 70 | 1/31/15 | 1/31/15 | 1/31/15 | Chronic aneurysmal changes with a contained rupture of right common iliac aneurysm  | Hypertension<br>End stage renal disease s/p radiocephalic AV fistula<br>rheumatoid arthritis<br>TIAs and CVAs<br>Type B aortic dissection, s/p aortic fenestration | Unknown        | Never   |                                                    | Antibiotics<br>Immunosupp<br>ressants | Floor                   | 2/20/15 | Home                     | Extubated         | 0 | 0 | 1 | 1 | 0 | 0  | 73    | 136.4 | 18.1 |
| 198 | MCU  | 2/8/15  | 2/16/15 | > 91    | 2/6/15  | 2/8/15  | 2/8/15  | Heart failure exacerbation                                                          | Hypertension<br>CKD stage 1 secondary to hypertension<br>Edema                                                                                                     | Unknown        | Never   | Lopressor                                          |                                       | Floor                   | 2/24/15 | Deceased                 | Extubated         | 0 | 0 | 0 | 0 | 0 | 63 | 120   | 21.3  |      |
| 199 | MCU  | 2/8/15  | 2/26/15 | 81 - 90 | 2/6/15  | 2/7/15  | 2/5/15  | Acute on chronic diastolic heart failure/Rapid Afib with rapid ventricular response | Paroxysmal Afib<br>Rheumatoid arthritis<br>Hypertension<br>Pericarditis<br>Moderate to severe aortic stenosis<br>Diastolic CHF                                     | Last 30 days   | Current | Lopressor<br>Anticoagulant<br>Antibiotics          | Antibiotics                           | Floor                   | 3/5/15  | Skilled nursing facility | Extubated         | 0 | 0 | 1 | 0 | 0 | 0  | 65    | 176   | 29.4 |
| 200 | ICU  | 2/8/15  | 2/16/15 | 18 - 30 | 2/6/15  | 2/7/15  | 2/6/15  | Septic shock/Acute respiratory failure                                              | ADHD<br>Opiate abuse<br>Depression/anxiety<br>Borderline personality disorder<br>OSA<br>GERD<br>Recurrent respiratory tract infections                             | Unknown        | Never   |                                                    | Antibiotics                           | Floor                   | 2/23/15 | Rehab                    | Extubated         | 1 |   |   | 0 | 0 | 68 | 319   | 48.4  |      |
| 201 | MCU  | 2/11/15 | 2/20/15 | 81 - 90 | 2/10/15 | 2/10/15 | 2/10/15 | Acute hypoxemic respiratory failure                                                 | Multiple myeloma<br>Hypertension<br>Prostate cancer<br>Osteoporosis<br>Peripheral neuropathy<br>Psoriasis                                                          | >1 year        | Unknown |                                                    | Antibiotics                           | Floor                   | 2/26/15 | Rehab                    | Extubated         | 0 | 0 | 1 | 0 | 0 | 0  | 67    | 187   | 29.4 |

|     |      |         |         |         |         |         |         |                                                                 |                                                                                                                                                               |                |         |                              |                                                           |                          |         |                         |              |   |   |   |   |   |    |       |       |       |      |
|-----|------|---------|---------|---------|---------|---------|---------|-----------------------------------------------------------------|---------------------------------------------------------------------------------------------------------------------------------------------------------------|----------------|---------|------------------------------|-----------------------------------------------------------|--------------------------|---------|-------------------------|--------------|---|---|---|---|---|----|-------|-------|-------|------|
| 202 | MICU | 2/11/15 | 2/13/15 | 61 - 70 | 2/6/15  | 2/11/15 | 2/11/15 | Right hepatic artery aneurysm/Sepsis/Acu te respiratory failure | Hypertlipidemia<br>Grand mal seizures<br>Depression/PTSD                                                                                                      | Unknown        | Never   | Anticoagulants               | Antibiotics                                               | Deceased                 | 2/12/15 | Deceased                | CMO          | 0 | 0 | 0 | 0 | 0 | 0  | 67    | 157.7 | 24.8  |      |
| 203 | SICU | 6/12/15 | 6/13/15 | 51 - 60 | 6/12/15 | 6/12/15 | 6/12/15 | Trauma<br>Found on Floor<br>Unconscious                         | Unknown                                                                                                                                                       | Unknown        | No      | Unknown                      |                                                           | Deceased                 | 6/13/15 | Deceased                | CMO          | 0 | 0 | 0 | 0 | 0 | 1  | 68    | 111   | 16.9  |      |
| 204 | SICU | 2/13/15 | 2/17/15 | 61 - 70 | 2/12/15 | 2/12/15 | 2/12/15 | Fournier gangrene                                               | Liver cirrhosis<br>Esophageal varices<br>Hypertension<br>Hyperlipidemia<br>Morbid obesity                                                                     | Unknown        | Unknown | Statin                       | Antibiotics                                               | Rehab                    | 2/26/15 | Rehab                   | Extubated    | 0 | 0 | 0 | 0 | 1 | 0  | 74    | 310.2 | 39.9  |      |
| 205 | ICU  | 2/14/15 | 2/18/15 | 61 - 70 | 2/13/15 | 2/13/15 | 2/13/15 | Right mainstem bronchus mass/Hypoxic respiratory failure        | Asthma<br>Hypertension<br>Hyperlipidemia<br>CAD s/p MI in 2004<br><br>Ischemic cardiomyopathy<br>Intracardiac apical thrombus<br><br>Hereditary spherocytosis | Unknown        | Never   | Antibiotics                  | Antibiotics                                               | Floor                    | 2/25/15 | Home w/ VNA             | Extubated    | 0 | 0 | 0 | 1 | 0 | 0  | 0     | 71    | 195.8 | 37.5 |
| 206 | SICU | 2/16/15 | 2/23/15 | 81 - 90 | 2/10/15 | 2/14/15 | 2/14/15 | Closure of ileostomy                                            | Benign prostatic hypertrophy<br>Nephrolithiasis<br>Ischemic colitis<br>CVA<br>CAD<br>Diverticulitis<br>Hypothyroidism<br><br>Chronic renal insufficiency      | 90 days-1 year | Unknown | Statins<br>Probiotics        | Antibiotics                                               | Floor, then back to SICU | 3/21/15 | Deceased                | Extubated    | 0 | 0 | 1 | 1 | 0 | 0  | 69    | 173.8 | 25.8  |      |
| 207 | MICU | 2/17/15 | 2/20/15 | 41 - 50 | 2/16/15 | 2/16/15 | 2/16/15 | Acute respiratory failure/Shock                                 | Hypertension<br><br>Congenital abnormality of the urethra                                                                                                     | Unknown        | Never   |                              | Antibiotics                                               | Floor                    | 2/25/15 | Home w/ VNA             | Extubated    | 0 | 0 | 0 | 0 | 0 | 0  | 59    | 174.2 | 35.2  |      |
| 208 | SICU | 2/18/15 | 2/26/15 | 81 - 90 | 2/17/15 | 2/17/15 | 2/17/15 | Elective right shoulder arthroplasty                            | Heart failure<br><br>Angina<br>AFib<br>Embollic CVA<br>Multinodular goiter<br>Uterovaginal prolapse<br>Anxiety/depression<br>Appendectomy<br>Hip replacement  | >1 year        | Unknown | Anticoagulants               | Antibiotics<br>Immunosupp<br>ressants                     | Floor                    | 3/9/15  | Home w/ VNA             | Extubated    | 0 | 0 | 0 | 0 | 1 | 0  | 65    | 118.8 | 19.6  |      |
| 209 | SICU | 2/21/15 | 3/3/15  | 61 - 70 | 2/20/15 | 2/20/15 | 2/19/15 | Explorative laparotomy and partial colectomy                    | Diabetes<br>OSA<br>Morbid obesity<br><br>Hypothyroidism<br>Hypertension<br>Recent MRSA infection                                                              | 30-90 days     | Current |                              | Antibiotics<br>Pressors<br>Sedation<br>Anticoagula<br>nts | Floor                    | 3/10/15 | Long term care facility | Extubated    | 0 | 0 | 0 | 0 | 1 | 0  | 66    | 330   | 53.1  |      |
| 210 | SICU | 2/27/15 | 3/5/15  | 61 - 70 | 2/19/15 | 2/19/15 | 2/19/15 | Ruptured abdominal aortic aneurysm left                         | Hypertension<br>BKA<br>s/p cataract surgery                                                                                                                   | Unknown        | Unknown | Statins                      | Antibiotics                                               | Long term care facility  | 3/13/15 | Long term care facility | Tracheostomy | 0 | 0 | 1 | 0 | 1 | 0  | 70    | 242   | 34.7  |      |
| 211 | SICU | 2/27/15 | 3/5/15  | 61 - 70 | 2/26/15 | 2/26/15 | 2/26/15 | Small bowel obstruction                                         | Laparoscopic bypass surgery<br>Diverticulitis s/p colon resection<br>Neck surgery<br>GI bleed                                                                 | Unknown        | Never   | Statins                      | Antibiotics                                               | Floor                    | 3/12/15 | Rehab                   | Extubated    | 1 | 0 | 0 | 0 | 1 | 0  | 68    | 215.6 | 32.7  |      |
| 212 | SICU | 2/27/15 | 3/12/15 | 41 - 50 | 2/24/15 | 2/24/15 | 2/24/15 | Intraparenchymal hemorrhage                                     | Alcoholic cirrhosis                                                                                                                                           | Unknown        | Unknown |                              |                                                           | Long term care facility  | 3/17/15 | Long term care facility | Tracheostomy | 1 | 0 | 0 | 0 | 0 | 1  | 64    | 158.2 | 27.1  |      |
| 213 | MICU | 3/3/15  | 3/12/15 | 71 - 80 | 2/26/15 | 3/3/15  | 3/3/15  | Acute hypoxic respiratory failure                               | AKI<br>Hypercalcemia<br>Developmental delay<br>Legally blind<br>Multiple myeloma<br>Diastolic CHF<br>Hypertension<br>Endometrial polypsis<br>Obesity          | Last 30 days   | Current | Lopressor                    | Antibiotics                                               | Floor                    | 3/14/15 | Deceased                | Extubated    | 0 | 0 | 0 | 0 | 0 | 0  | 65    | 194.5 | 32.5  |      |
| 214 | MICU | 3/5/15  | 3/9/15  | 51 - 60 | 3/5/15  | 3/5/15  | 3/5/15  | Intracranial hemorrhage                                         | Diabetes<br>Cirrhosis: NASH vs. alcoholic<br>Obesity<br>OSA<br>Hypertension<br>Dyslipidemia                                                                   | Unknown        | Never   | Lopressor<br><br>Antibiotics | Antibiotics                                               | Deceased                 | 3/8/15  | Deceased                | CMO          | 1 | 0 | 0 | 0 | 0 | 68 | 356.4 | 54.1  |       |      |
| 215 | MICU | 3/9/15  | 3/13/15 | 18 - 30 | 3/8/15  | 3/8/15  | 3/8/15  | Acute respiratory failure/Cardiac arrest/Drug OD                | Drug abuse                                                                                                                                                    | Unknown        | Never   | None                         |                                                           | Deceased                 | 3/13/15 | Deceased                | Deceased     | 0 | 0 | 1 | 0 | 0 | 0  | 71    | 148.3 | 20.7  |      |
| 216 | MICU | 3/10/15 | 3/14/15 | 41 - 50 | 3/7/15  | 3/7/15  | 3/7/15  | Altered mental status/Sepsis/Pneumonia                          | Seizures<br>Hypertension<br>Alcohol abuse<br>Liver disease<br>Bipolar                                                                                         | Unknown        | Never   | Lopressor                    | Antibiotics                                               | Floor                    | 3/20/15 | Rehab                   | Extubated    | 1 | 0 | 0 | 0 | 0 | 68 | 162.8 | 24.7  |       |      |
| 217 | SICU | 3/10/15 | 3/21/15 | 51 - 60 | 3/7/15  | 3/8/15  | 3/9/15  | Necrotizing soft tissue infection                               | Hypertension<br><br>GERD<br>Alcohol abuse<br>Left hip replacement<br>Depression                                                                               | >1 year        | Unknown | Lopressor                    | Antibiotics<br>Immunosupp<br>ressants                     |                          | 4/10/15 | Rehab                   | Extubated    | 1 | 0 | 0 | 0 | 1 | 0  | 72    | 209   | 28.7  |      |
| 218 | SICU | 3/15/15 | 3/25/15 | 71 - 80 | 3/15/15 | 3/15/15 | 3/15/15 | Polytrauma s/p fall                                             | Esophageal cancer s/p esophagectomy<br>COPD<br>Stomach cancer                                                                                                 | Unknown        | Unknown |                              |                                                           |                          | 3/31/15 | Acute Rehab             | Extubated    |   |   |   |   |   |    | 1     |       |       |      |
| 219 | SICU | 3/15/15 | 3/28/15 | 61 - 70 | 3/5/15  | 3/7/15  | 3/15/15 | Deceased donor liver transplant                                 | Hepatitis C<br><br>Hepatocellular carcinoma s/p transarterial chemoembolization                                                                               | Last 30 days   | Never   | Antibiotics                  | Immunosupp<br>ressants                                    |                          | 5/12/15 | Long term care          | Tracheostomy | 1 | 0 | 0 | 1 | 1 | 0  | 68    | 200.2 | 30.4  |      |

| ICU | Admission Date | Discharge Date | Age   | ICD-10  | ICD-9   | ICD-10-PCS | ICD-9-CM-PCS | Primary Diagnosis                                                                     | Secondary Diagnosis                                                                                                                                                                     | Discharge Date                                                                                | Discharge Status | Discharge Date                     | Discharge Status     | Discharge Date | Discharge Status     | Discharge Date | Discharge Status | Discharge Date | Discharge Status | Discharge Date | Discharge Status | Discharge Date | Discharge Status | Discharge Date | Discharge Status | Discharge Date | Discharge Status |
|-----|----------------|----------------|-------|---------|---------|------------|--------------|---------------------------------------------------------------------------------------|-----------------------------------------------------------------------------------------------------------------------------------------------------------------------------------------|-----------------------------------------------------------------------------------------------|------------------|------------------------------------|----------------------|----------------|----------------------|----------------|------------------|----------------|------------------|----------------|------------------|----------------|------------------|----------------|------------------|----------------|------------------|
| 220 | 6/14/15        | 6/19/15        | 71-80 | 6/5/15  | 6/6/15  | 6/9/15     | F01.90       | Chest Trauma                                                                          | Cirrhosis<br>Bipolar disorder<br>Esophageal varices<br>Hepatic encephalopathy<br>Spontaneous bacterial peritonitis<br>Gout<br>Hypertension<br>OSA                                       | Pneumonia<br>UTI<br>Asthma<br>Pulmonary Emphysema<br>Peripheral neuropathy<br>Hep C infection | Unknown          | Never                              |                      |                | 6.24.15              | Long term care | Tracheostomy     | 1              | 1                | 0              | 0                | 1              | 70               | 144            | 20.66            |                |                  |
| 221 | 3/18/15        | 3/30/15        | 71-80 | 3/17/15 | 3/17/15 | 3/17/15    | J01.90       | Acute hypoxic respiratory failure                                                     | Dementia<br>Dysphagia<br>Diabetes<br>Hypothyroidism<br>Hypertension                                                                                                                     | 30-90 days                                                                                    | Current          | Antibiotics<br>Lopressor           |                      | 4/5/15         | Rehab                | Self-Extubated |                  |                |                  |                |                  | 52             | 98.8             | 25.8           |                  |                |                  |
| 222 | 3/19/15        | 3/29/15        | 61-70 | 3/19/15 | 3/19/15 | 3/19/15    | 59.02        | Obstructive left ureteral stone/Septis                                                | Primary progressive multiple sclerosis<br>Dysphagia<br>Depression<br>PTSD<br>Neurogenic bladder<br>Herpes zoster<br>Hypothyroidism<br>Hypertension                                      | >1 year                                                                                       | Unknown          | Statins<br>Antibiotics             |                      | 4/3/15         | Assisted living      | Extubated      | 0                | 0              | 0                | 0              | 0                | 65             | 176              | 29.4           |                  |                |                  |
| 223 | 3/21/15        | 3/24/15        | 61-70 | 3/20/15 | 3/20/15 | 3.20.15    | J01.90       | Acute hypoxic respiratory failure                                                     | Pulmonary hypertension<br>Asthma<br>Diabetes<br>Diastolic CHF<br>Anxiety/Depression<br>CAD<br>Chronic renal insufficiency<br>Hypertension<br>Bilateral Ischemic stroke<br>Paget disease | 90 days-1 year                                                                                | Never            | Antibiotics<br>Immunosuppr essants | Floor                | 3/28/15        | Rehab                | Extubated      |                  |                |                  |                |                  | 65             | 196.9            | 32.9           |                  |                |                  |
| 224 | 3/22/15        | 3/27/15        | 51-60 | 3/21/15 | 3/21/15 | 3.21.15    | J01.90       | Hypoxic respiratory failure                                                           | CVA with residual hemiplegia<br>Recurrent Aspiration Pneumonia<br>Cirrhosis(ETOH and Hep-C)<br>COPD                                                                                     | 30-90 days                                                                                    | Never            | Antibiotic<br>Bronchodilator       | Deceased             | 3.26.15        | Deceased             | Deceased       |                  |                |                  |                |                  | 66             | 154              | 24.9           |                  |                |                  |
| 225 | 3/22/15        | 4/8/15         | 51-60 | 3/21/15 | 3/21/15 | 3/22/15    | J01.90       | Flu Pneumonia                                                                         | HTN<br>Hypokalemia<br>Obesity                                                                                                                                                           | unknown                                                                                       | never            |                                    | Long term Care       | 4/30/15        | Long term Care       | Tracheostomy   | 0                | 0              | 1                | 0              | 0                | 68             | 260              | 39.5           |                  |                |                  |
| 226 | 3/26/15        | 3/28/15        | 61-70 | 3/24/15 | 3/24/15 | 3/25/15    | J01.90       | Recurrent diverticulitis<br>Septic shock<br>Peritonitis                               | Prolapsed mitral valve leaflet syndrome<br>Diverticulitis of colon<br>GERD<br>Atrial fibrillation                                                                                       | unknown                                                                                       | Never            |                                    | Deceased             | 4/22/15        | Deceased             | Extubated      | 0                | 0              | 0                | 0              | 0                | 65             | 116              | 19.3           |                  |                |                  |
| 227 | 6/16/15        | 6/19/15        | 18-30 | 6/14/15 | 6/14/15 | 6/15/15    | S06.01       | Epidural hematoma                                                                     | NASH<br>Depression<br>Anorexia<br>Alcoholism<br>RLS                                                                                                                                     | Unknown                                                                                       | Never            |                                    |                      | 7/1/15         | Acute Rehab          | Extubated      | 1                | 1              | 1                | 1              | 1                | 70             | 131              | 18.8           |                  |                |                  |
| 228 | 3/26/15        | 4/7/15         | 61-70 | 3/25/15 | 3/25/15 | 3/25/15    | J01.90       | Acute respiratory failure with hypoxia<br>Status post cardiac arrest<br>Flu pneumonia | ALS<br>Multiple myeloma<br>Peripheral neuropathy                                                                                                                                        | Unknown                                                                                       |                  | Antibiotic<br>Immunosuppressant    | Long term acute care | 4/29/15        | Long term acute care | Tracheostomy   | 0                | 0              | 0                | 0              | 0                | 68             | 162              | 24.6           |                  |                |                  |
| 229 | 4/6/15         | 4/9/15         | 61-70 | 4/5/15  | 4/5/15  | 4/11/15    | J01.90       | Acute respiratory failure<br>Shock<br>Renal failure                                   | Alcohol abuse<br>Cirrhosis<br>Hepatitis C<br>Peripheral Vascular disease<br>COPD<br>CAD                                                                                                 | 30 days                                                                                       | Unknown          | Antibiotic<br>Steroids             | Deceased             | 4/9/15         | Deceased             | CMO            | 1                | 1              | 1                | 0              | 0                | 72             | 183              | 24             |                  |                |                  |
| 230 | 4/6/15         | 4/16/15        | 41-50 | 4/5/15  | 4/5/15  | 4/5/15     | J01.90       | Hepatic failure                                                                       | Hypothyroidism<br>Hemochromatosis carrier                                                                                                                                               | 30 days                                                                                       | Yes              | Antibiotic                         | Long term care       | 5/11/15        | Long term care       | Extubated      | 1                | 0              | 0                | 0              | 0                | 65             | 181              | 30.2           |                  |                |                  |
| 231 | 4/6/15         | 4/9/15         | 41-50 | 4/5/15  | 4/5/15  | 4/5/15     | K70.90       | Alcoholic cirrhosis with ascites                                                      | Alcoholic cirrhosis<br>VRE<br>Esophageal varices                                                                                                                                        | 30 days                                                                                       | Never            |                                    | Deceased             | 4/9/15         | Deceased             | CMO            | 1                | 0              | 1                | 0              | 0                | 72             | 225              | 30.5           |                  |                |                  |
| 232 | 4/8/15         | 4/25/15        | 81-90 | 4/6/15  | 4/7/15  | 4/7/15     | I70.90       | Ruptured AAA                                                                          | Hypertension<br>Hypercholesterolemia<br>Depression                                                                                                                                      | Unknown                                                                                       | Never            | Unknown                            | Long term care       | 5/6/15         | Long term care       | Tracheostomy   | 1                | 1              | 1                | 1              | 0                | 73             | 202              | 27             |                  |                |                  |
| 233 | 4/8/15         | 4/16/15        | 71-80 | 4/2/15  | 4/2/15  | 4/2/15     | M63.90       | AAA                                                                                   | Arthritis<br>Prostate cancer<br>Aortic Stenosis<br>Peripheral Vascular disease<br>Sleep apnea<br>GERD<br>DM                                                                             | 30 days                                                                                       | Never            | Statin                             | Long term care       | 4/30/15        | Long term care       | Tracheostomy   | 1                | 0              | 1                | 0              | 0                | 69             | 207              | 30.6           |                  |                |                  |
| 234 | 4/10/15        | 4/17/15        | 41-50 | 4/9/15  | 4/10/15 | 4/10/15    | J01.90       | Pneumonia                                                                             | Alzheimer disease<br>Development delay<br>Bundle Branch Block                                                                                                                           | 30-90 days                                                                                    |                  | Donepezil                          | Deceased             | 4/16/15        | Deceased             | CMO            | 1                | 0              | 0                | 0              | 0                | 60             | 143              | 27             |                  |                |                  |
| 235 | 4/12/15        | 4/14/15        | 71-80 | 4/10/15 | 4/11/15 | 4/11/15    | M54.90       | Lumbar Radiculopathy                                                                  | Sciatica                                                                                                                                                                                | Unknown                                                                                       |                  |                                    | step-down            | 4/22/15        | Rehab                | Extubated      | 0                | 0              | 0                | 0              | 0                | 62             | 243              | 44.4           |                  |                |                  |
| 236 | 4/14/15        | 4/17/15        | 61-70 | 4/13/15 | 4/13/15 | 4/13/15    | J01.90       | Respiratory Failure                                                                   | CVA<br>CAD<br>HTN<br>Ischemic Cardiomyopathy                                                                                                                                            | 30-90 days                                                                                    | never            | Statin                             | floor                | 4/19/15        | Home self care       | Extubated      | 0                | 0              | 0                | 0              | 0                | 72             | 292              | 39.6           |                  |                |                  |
| 237 | 4/15/15        | 4/25/15        | 71-80 | 4/14/15 | 4/15/15 | 4/14/15    | J01.90       | Encephalopathy<br>Acute/Respiratory failure<br>Shock                                  | COPD<br>Seizure disorder<br>CKD<br>HTN<br>BPH<br>recurrent UTI                                                                                                                          | 90 days to 1 year                                                                             | Yes              | Statin                             | Floor                | 5/5/15         | other hospital       | Extubated      | 0                | 0              | 1                | 0              | 0                | 70             | 271              | 38.9           |                  |                |                  |
| 238 | 4/15/15        | 5/3/15         | 81-90 | 4/13/15 | 4/13/15 | 4/13/15    | K56.90       | SBO                                                                                   | Ischemic Bowel Disease<br>DM<br>HTN<br>Heart failure rEF<br>BPH<br>Urethral stricture                                                                                                   | 90 days to 1 year                                                                             | Yes              | anticoagulant                      | Deceased             | 5/3/15         | Deceased             | CMO            | 0                | 0              | 0                | 0              | 0                | 70             | 186              | 30.82          |                  |                |                  |
| 239 | 4/16/15        | 4/30/15        | 71-80 | 4/14/15 | 4/15/15 | 4/15/15    | J01.90       | Flu                                                                                   | HTN<br>Obesity hypoventilation Syndrom<br>DM                                                                                                                                            | 90 days to 1 year                                                                             | never            | Statin                             | Deceased             | 4/29/15        | Deceased             | CMO            | 0                | 0              | 1                | 0              | 0                | 64             | 277              | 47.5           |                  |                |                  |

PVD  
CAD

|     |      |         |         |         |         |         |         |                                                                   |                                                                                                                             |                      |              |                                                                |                |                       |                                                |   |   |   |   |   |   |    |     |      |
|-----|------|---------|---------|---------|---------|---------|---------|-------------------------------------------------------------------|-----------------------------------------------------------------------------------------------------------------------------|----------------------|--------------|----------------------------------------------------------------|----------------|-----------------------|------------------------------------------------|---|---|---|---|---|---|----|-----|------|
| 240 | ICU  | 4/16/15 | 4/18/15 | 41 - 50 | 4/14/15 | 4/14/15 | 4/14/15 | Hypercapnic<br>Respiratory Failure                                | COPD<br>Cellulitis                                                                                                          | 30-90 days           | yes          | Insulin                                                        | Floor          | 4/21/15 Facility      | Other Health Care<br>Extubated                 | 0 | 0 | 0 | 0 | 0 | 0 | 70 | 270 | 38.7 |
|     |      |         |         |         |         |         |         | Altered Mental Status                                             | Proteinuria<br>DM<br>HTN<br>Sleep Apnea<br>Venous insufficiency                                                             |                      |              |                                                                |                |                       |                                                |   |   |   |   |   |   |    |     |      |
| 241 | ICU  | 4/16/15 | 4/18/15 | 71 - 80 | 4/15/15 | 4/15/15 | 4/15/15 | Septic Shock<br>Pneumonia<br>Acute Resoiroatory<br>Failure<br>AKI | HTN<br>Dyslipidemia                                                                                                         | Unknown              | Never        | Statins                                                        | Floor          | 4/26/15 Care services | Home with Health<br>Care services<br>Extubated | 0 | 1 | 0 | 0 | 0 | 0 | 63 | 118 | 20.9 |
| 242 | MICU | 5/13/15 | 5/19/15 | 61 - 70 | 5/12/15 | 5/12/15 | 5/12/15 | Respiratory failure<br>with Hypoxia                               | Obesity hypoventilation<br>syndrom<br>A-fib<br>CAD s/p CABG<br>CHF<br>DM                                                    | Unknown              | Yes          | Statin<br>Insulin<br>Anticoagulant<br>Lopressor                | Floor          | 6/8/15 Nursing Home   | Extubated                                      | 0 | 0 | 0 | 0 | 0 | 0 | 70 | 314 | 42.6 |
| 243 | MICU | 5/14/15 | 5/16/15 | 71 - 80 | 4/30/15 | 5/12/15 | 5/12/15 | COPD                                                              | COPD<br>CHF<br>DM<br>HTN<br>Hyperlipidemia<br>Asthma                                                                        | Unknown              | Never        | Antibiotic<br>Insulin<br>Steroids                              | Deceased       | 5/15/15 Deceased      | CMD                                            | 0 | 0 | 1 | 0 | 0 | 0 | 62 | 194 | 35.5 |
| 244 | SCU  | 4/18/15 | 4/25/15 | 18 - 30 | 4/11/15 | 4/17/15 | 4/17/15 | Sepsis<br>Right leg infection                                     | DM<br>Asthma<br>Morbid Obesity<br>HTN<br>Venous Insufficiency b/l<br>lower extremities                                      | Never                | Never        | albuterol                                                      | Deceased       | 4/24/15 Deceased      | Deceased                                       | 1 | 0 | 0 | 0 | 0 | 0 | 70 | 511 | 73.3 |
| 245 | ICU  | 4/20/15 | 4/25/15 | 51 - 60 | 4/19/15 | 4/19/15 | 4/20/15 | Liver Cirrhosis                                                   | Alcoholic Cirrhosis                                                                                                         | 30 days              | Never        | Nadolol                                                        | Deceased       | 5/3/15 Deceased       | Extubated                                      | 1 | 1 | 0 | 0 | 0 | 0 | 64 | 157 | 26.9 |
|     |      |         |         |         |         |         |         | Hepatorenal Syndrome                                              | Hypothyroidism<br>HLD<br>Esophageal varices                                                                                 |                      |              |                                                                |                |                       |                                                |   |   |   |   |   |   |    |     |      |
| 246 | SCU  | 4/23/15 | 5/8/15  | 51 - 60 | 4/22/15 | 4/22/15 | 4/22/15 | Liver Failure                                                     | Cirrhosis<br>Chronic Hep C<br>Ascites<br>Anemia<br>DM<br>Hepatic Encephalopathy                                             | 90 days to 1<br>year |              | Antibiotic<br>Insulin                                          | Rehab          | 5/21/15 Rehab         | Tracheostomy                                   | 0 | 1 |   |   |   |   | 61 | 108 | 20.4 |
| 247 | MICU | 4/29/15 | 5/1/15  | 41 - 50 | 4/27/15 | 4/27/15 | 4/27/15 | Acute Respiratory<br>failure                                      | HTN<br>Diastolic heart failure<br>Paroxysmal atrial fib<br>CKD<br>Brain Lesion<br>Seizures<br>Immune deficiency<br>disorder | 30 days              | Yes          | Statin<br>Antibiotic<br>Steroids<br>Anticoagulation            | Floor          | 5/9/15 Rehab          | Self Extubated                                 | 1 | 0 | 0 |   |   |   | 70 | 220 | 27.3 |
| 248 | MICU | 4/29/15 | 5/1/15  | 71 - 80 | 4/13/15 | 4/20/15 | 4/24/15 | Shortness of breath                                               | Arthritis                                                                                                                   | >1 year              | never        | Statin                                                         | Deceased       | 5/1/15 Deceased       | Deceased                                       | 1 | 0 | 0 |   |   |   | 64 | 176 | 30.2 |
|     |      |         |         |         |         |         |         | Interstitial Lung Disease                                         | Asthma<br>COPD<br>DM<br>N/o transfusion                                                                                     |                      |              | Salmeterol Inhaler                                             |                |                       |                                                |   |   |   |   |   |   |    |     |      |
| 249 | MICU | 5/7/15  | 5/15/15 | 51 - 60 | 5/3/15  | 5/4/15  | 5/4/15  | Hyponatremia                                                      | HTN<br>GOUT<br>Dyslipidemia                                                                                                 | Unknown              | never before | Fibrate<br>Statin<br>ACE inhibitor                             | Floor          | 5/22/15 Nursing Home  | Extubated                                      | 1 | 0 | 1 |   |   |   | 74 | 199 | 25.5 |
| 250 | MICU | 5/8/15  | 5/24/15 | 71 - 80 | 5/8/15  | 5/8/15  | 5/8/15  | Sepsis                                                            | COPD<br>HTN<br>A-fib<br>Morbid Obesity<br>Cellulitis<br>Anemia<br>GERD<br>Depression                                        | Last 30 days         | Acute Rehab  | Antibiotic<br>Salmeterol Inhaler<br>Insulin<br>Anticoagulation | Long Term Care | 5/28/15 Care          | Long Term Acute<br>Care<br>Tracheostomy        |   |   |   |   |   |   | 72 | 275 | 37.3 |
