# Supplementary material for: The utility of endotracheal aspirate bacteriology in identifying mechanically ventilated patients at risk for ventilator associated pneumonia: a single-center prospective observational study
Source: Springer Nature journal article supplement (doi:10.1186/s12879-019-4367-7), 2019-08-29
Supplement: MOESM8 [file 17117016]

|     |          |                              |  |       |      |     |       |     |     |               |         |
|-----|----------|------------------------------|--|-------|------|-----|-------|-----|-----|---------------|---------|
|     | 15/07/14 | Yes                          |  | 11.84 | 38.4 | Yes | 101.2 | VAP | 2+  | 0             |         |
|     | 16/07/14 | Yes                          |  | 11.35 | 38.4 | Yes | 101.2 | VAP | 4+  | 0             |         |
|     | 17/07/14 | No                           |  | 11.33 | 37.6 | No  | 99.7  |     | 3+  | 0             |         |
| 015 | 07/07/14 | No                           |  | 18.23 | 39.9 | No  |       |     | 0   | 0             |         |
|     | 08/07/14 | No                           |  | 14.35 | 39.1 | Yes |       |     | 0   | 0             |         |
|     | 09/07/14 | No                           |  | 10.55 | 38.4 | Yes |       |     | 0   | 0             |         |
|     | 10/07/14 | No                           |  | 10.24 | 38.5 | Yes |       |     | 0   | 1+ ACCA       |         |
|     | 11/07/14 | No                           |  | 10.58 | 38.8 | No  | 101.9 |     | 0   | 0             |         |
|     | 12/07/14 | No                           |  | 10.57 | 38.3 | No  | 100.9 |     | 0   | 0             |         |
|     | 13/07/14 | Yes (new)                    |  | 12.59 | 38.6 | No  | 101.5 | VAP | 0   | 0             |         |
|     | 14/07/14 | Yes (progressive)            |  | 12.53 | 39.6 | Yes | 103.2 | VAP | 0   | 0             |         |
|     | 15/07/14 | Yes                          |  | 10.36 | 38.8 | No  | 101.8 |     | 2+  | 2+ SPNE       |         |
|     | 16/07/14 | N/A                          |  | N/A   | N/A  | No  |       |     | 0   | 0             |         |
|     | 17/07/14 | N/A                          |  | N/A   | N/A  | No  |       |     | 0   | 0             |         |
| 016 | 11/07/14 | Yes (not new or progressive) |  | 13.27 | 39.3 | Yes | 102.8 |     | N/A | N/A           |         |
|     | 12/07/14 | No                           |  | 13.9  | 36.9 | No  | 98.4  |     | 0   | 0             |         |
|     | 13/07/14 | Yes (new)                    |  | 14.59 | 37.1 | No  | 98.8  |     | 0   | 0             |         |
|     | 14/07/14 | Yes                          |  | 12.71 | 37.1 | Yes | 98.8  | VAP | 0   | 0             |         |
|     | 15/07/14 | N/A                          |  | 12.22 | 36.6 | N/A | 97.9  |     | N/A | N/A           |         |
| 017 | 11/07/14 | Yes (not new or progressive) |  | 10.67 | 37.1 | No  | 98.8  |     | 0   | 0             |         |
|     | 12/07/14 | Yes (not new or progressive) |  | 11.24 | 37.4 | No  | 99.3  |     | 0   | 1+ KP         |         |
|     | 13/07/14 | Yes (not new or progressive) |  | 20.46 | 37.5 | No  | 99.5  |     | 0   | 4+ KP         |         |
|     | 14/07/14 | Yes (not new or progressive) |  | 23.05 | 37.1 | No  | 98.7  |     | 0   | 4+ KP         |         |
|     | 15/07/14 | N/A                          |  | N/A   | N/A  | N/A |       |     | N/A | N/A           |         |
| 018 | 13/07/14 | No                           |  | 3.25  | 32.8 | Yes |       |     | 0   | 0             |         |
|     | 14/07/14 | Yes (new)                    |  | 1.37  | 38.2 | Yes |       |     | 0   | 0             |         |
|     | 15/07/14 | No                           |  | 1.86  | 38.6 | No  |       |     | 0   | 0             |         |
|     | 16/07/14 | Yes (new)                    |  | 1.87  | 38.0 | No  | 100.4 |     | 0   | 0             |         |
|     | 17/07/14 | Yes                          |  | 2.31  | 39.4 | Yes | 103   | VAP | 0   | 0             |         |
|     | 18/07/14 | No                           |  | 4.04  | 39.0 | Yes | 102.2 |     | 0   | 0             |         |
|     | 19/07/14 | No                           |  | 3.73  | 37.9 | No  | 100.3 |     | 0   | 0             |         |
|     | 20/07/14 | No                           |  | 2.38  | 39.3 | No  | 102.7 |     | 0   | 0             |         |
|     | 21/07/14 | No                           |  | 1.57  | 38.3 | No  | 101   |     | 0   | 0             |         |
|     | 22/07/14 | No                           |  | 0.76  | 37.2 | No  | 98.9  |     | 0   | 0             |         |
| 019 | 14/07/14 | No                           |  | 11.62 | 37.7 | No  |       |     | 0   | 0             |         |
|     | 15/07/14 | Yes (new)                    |  | 9.86  | 38.0 | No  |       |     | 0   | 0             |         |
|     | 16/07/14 | Yes                          |  | 8.18  | 38.3 | No  | 101   |     | 0   | 0             |         |
|     | 17/07/14 | Yes                          |  | 10.15 | 37.9 | No  | 100.2 |     | 0   | 0             |         |
|     | 18/07/14 | Yes                          |  | 10.02 | 37.4 | No  | 99.4  |     | 0   | 0             |         |
|     | 19/07/14 | Yes                          |  | 11.14 | 38.1 | No  | 100.5 |     | 0   | 0             |         |
|     | 20/07/14 | Yes                          |  | 8.84  | 38.2 | Yes | 100.7 |     | 0   | 0             |         |
|     | 21/07/14 | Yes                          |  | 12.05 | 38.2 | No  | 100.8 |     | 0   | 0             |         |
|     | 22/07/14 | No                           |  | 12.37 | 38.9 | No  | 102   |     | 0   | 0             |         |
|     | 23/07/14 | Yes (new)                    |  | 10.97 | 36.9 | Yes | 98.5  |     | 0   | 1+ mold       |         |
|     | 24/07/14 | Yes                          |  | 10.91 | 38.0 | Yes | 100.4 |     | 0   | 1+ mold       |         |
|     | 25/07/14 | Yes                          |  | N/A   | 38.8 | No  | 101.9 |     | 0   | 0             |         |
| 020 | 20/05/15 | No                           |  | 22.9  | 38.8 | Yes | 101.8 |     | 0   | 0             |         |
|     | 21/05/15 | N/A                          |  | 21.53 | 37.9 | N/A | 100.2 |     | N/A | N/A           |         |
| 021 | 15/07/14 | Yes (not new or progressive) |  | 1.93  | 38.0 | Yes | 100.4 |     | 2+  | 0             |         |
|     | 16/07/14 | Yes (not new or progressive) |  | 3.21  | 39.5 | No  | 103.1 |     | 4+  | 0             |         |
|     | 17/07/14 | Yes (not new or progressive) |  | 4.98  | 37.9 | No  | 100.3 |     | 2+  | 0             |         |
|     | 18/07/14 | Yes (not new or progressive) |  | 6.31  | 38.0 | No  | 100.4 |     | 0   | 0             |         |
|     | 19/07/14 | No                           |  | 7.69  | 37.8 | No  | 100.1 |     | 2+  | 0             |         |
|     | 20/07/14 | Yes (new)                    |  | 11.22 | 39.0 | No  | 102.2 | VAP | 1+  | 0             |         |
|     | 21/07/14 | Yes                          |  | 13.88 | 39.3 | No  | 102.8 | VAP | 0   | 0             |         |
|     | 22/07/14 | Yes                          |  | 13.01 | 37.6 | N/A | 99.6  |     | N/A | N/A           |         |
|     | 23/07/14 | Yes                          |  | 11.06 | 37.0 | N/A | 98.6  |     | N/A | N/A           |         |
| 022 | 15/07/14 | Yes (not new or progressive) |  | 20.86 | 36.9 | No  | 98.5  |     | 3+  | 4+ PSA; 1+ KP | PSA, KP |
|     | 16/07/14 | Yes (not new or progressive) |  | 20.26 | 38.1 | Yes | 100.6 |     | 3+  | 4+ PSA; 2+ KP |         |
|     | 17/07/14 | Yes (not new or progressive) |  | 25.25 | 38.7 | Yes |       |     | 3+  | 3+ PSA; 3+ KP |         |
|     | 18/07/14 | Yes (not new or progressive) |  | 14.99 | 36.9 | Yes |       |     | 3+  | 3+ PSA        |         |
|     | 19/07/14 | No                           |  | 20.4  | 36.6 | Yes | 97.9  |     | 1+  | 1+ PSA; 1+ KP |         |
| 023 | 20/07/14 | Yes (not new or progressive) |  | 13.07 | 37.7 | Yes | 99.9  |     | 3+  | 0             |         |
|     | 21/07/14 | Yes (not new or progressive) |  | 26.62 | 37.3 | No  | 99.1  |     | 2+  | 0             |         |
|     | 22/07/14 | Yes (not new or progressive) |  | 20.3  | 37.3 | Yes | 99.1  |     | 1+  | 0             |         |
|     | 23/07/14 | Yes (not new or progressive) |  | 14.49 | 37.1 | No  | 98.8  |     | 0   | 0             |         |
|     | 24/07/14 | Yes (not new or progressive) |  | 10.95 | 37.4 | Yes | 99.4  |     | 0   | 0             |         |
|     | 25/07/14 | Yes (not new or progressive) |  | 8.57  | 37.6 | Yes | 99.6  |     | 0   | 0             |         |
|     | 26/07/14 | Yes (not new or progressive) |  | 8.75  | 37.8 | No  | 100   |     | 0   | 0             |         |
|     | 27/07/14 | Yes (not new or progressive) |  | 5.95  | 38.6 | No  | 101.5 |     | 0   | 0             |         |
|     | 28/07/14 | Yes (not new or progressive) |  | 5.91  | 37.8 | No  | 100   |     | 0   | 0             |         |
|     | 29/07/14 | Yes (not new or progressive) |  | 3.68  | 38.4 | No  | 101.1 |     | 0   | 0             |         |
|     | 30/07/14 | Yes (not new or progressive) |  | 3.77  | 38.0 | Yes | 100.4 |     | 0   | 0             |         |
|     | 31/07/14 | Yes (not new or progressive) |  | 5.2   | 37.5 | Yes | 99.5  |     | 0   | 0             |         |
|     | 01/08/14 | Yes (not new or progressive) |  | 3.43  | 37.4 | No  | 99.4  |     | 0   | 0             |         |
| 024 | 20/07/14 | No                           |  | 4.94  | 36.7 | N/A | 98    |     | N/A | N/A           |         |
|     | 21/07/14 | Yes (new)                    |  | 9.12  | 36.9 | Yes |       |     | 0   | 0             |         |
|     | 22/07/14 | Yes                          |  | 5.03  | 37.3 | No  | 99.2  |     | 0   | 0             |         |
|     | 23/07/14 | No                           |  | 3.67  | 37.4 | Yes | 99.3  |     | 0   | 0             |         |
|     | 24/07/14 | Yes (new)                    |  | 3.45  | 39.4 | Yes | 102.9 | VAP | 0   | 0             |         |
|     | 25/07/14 | Yes                          |  | 11.25 | 39.6 | Yes | 103.2 | VAP | 0   | 0             |         |
|     | 26/07/14 | Yes                          |  | 5.68  | 36.8 | N/A | 98.2  |     | N/A | N/A           |         |
| 025 | 20/05/15 | Yes (not new or progressive) |  | 15.48 | 37.7 | No  | 99.9  |     | 0   | 0             |         |
|     | 21/05/15 | Yes (not new or progressive) |  | 10.77 | 37.9 | Yes | 100.3 |     | 0   | 0             |         |
|     | 22/05/15 | Yes (not new or progressive) |  | 8.91  | 37.8 | N/A | 100.1 |     | N/A | N/A           |         |
|     | 23/05/15 | N/A                          |  | N/A   | N/A  | N/A |       |     | N/A | N/A           |         |
| 026 | 22/07/14 | No                           |  | 9.19  | 38.3 | Yes | 101   |     | 0   | 4+ KP         |         |
|     | 23/07/14 | Yes (new)                    |  | 7.76  | 37.9 | Yes | 100.3 |     | 0   | 3+ KP         |         |
|     | 24/07/14 | Yes                          |  | 9.17  | 38.1 | Yes | 100.6 |     | 0   | 1+ KP         |         |
|     | 25/07/14 | Yes                          |  | 6.51  | 37.4 | N/A | 99.3  |     | N/A | N/A           |         |
| 027 | 22/07/14 | Yes (not new or progressive) |  | 5.71  | 37.8 | No  | 100   |     | 0   | 0             |         |
|     | 23/07/14 | Yes (not new or progressive) |  | 5.02  | 37.7 | N/A | 99.9  |     | 0   | 0             |         |
|     | 24/07/14 | No                           |  | 8.83  | 37.3 | N/A | 99.2  |     | 0   | 0             |         |
| 028 | 22/07/14 | Yes (not new or progressive) |  | 38.18 | 37.2 | Yes | 99    |     | 0   | 0             |         |
|     | 23/07/14 | Yes (not new or progressive) |  | 25.41 | 37.0 | N/A | 98.6  |     | N/A | N/A           |         |
| 029 | 22/07/14 | No                           |  | 8.86  | 38.7 | Yes | 101.6 |     | 0   | 0             |         |
|     | 23/07/14 | No                           |  | 10.81 | 37.9 | Yes | 100.3 |     | 0   | 0             |         |
|     | 24/07/14 | No                           |  | 10.62 | 38.6 | Yes | 101.4 |     | 0   | 0             |         |
|     | 25/07/14 | No                           |  | 10.02 | 37.3 | Yes | 99.1  |     | 0   | 0             |         |
|     | 26/07/14 | No                           |  | 13.66 | 37.6 | Yes | 99.7  |     | 0   | 0             |         |
|     | 27/07/14 | No                           |  | 12.26 | 37.4 | No  | 99.4  |     | 0   | 0             |         |
|     | 28/07/14 | No                           |  | 12.81 | 37.6 | Yes | 99.7  |     | 0   | 0             |         |
|     | 29/07/14 | No                           |  | 13.47 | 37.3 | Yes | 99.1  |     | 0   | 0             |         |
|     | 30/07/14 | No                           |  | 15.87 | 37.3 | Yes | 99.1  |     | 0   | 3+ HFLU       |         |
| 030 | 25/07/14 | Yes (not new or progressive) |  | 7.06  | 37.6 | Yes | 99.7  |     | 3+  | 0             |         |
|     | 26/07/14 | Yes (not new or progressive) |  | 9.06  | 37.7 | N/A | 99.9  |     | N/A | N/A           |         |
|     | 27/07/14 | Yes (not new or progressive) |  | 10.29 | 37.4 | N/A | 99.4  |     | N/A | N/A           |         |
| 031 | 25/07/14 | Yes (not new or progressive) |  | 16.92 | 37.7 | Yes | 99.8  |     | N/A | N/A           |         |
|     | 26/07/14 | Yes (not new or progressive) |  | N/A   | 37.2 | Yes | 98.9  |     | 0   | 0             |         |
|     | 27/07/14 | Yes (not new or progressive) |  | 12.24 | 37.2 | No  | 98.9  |     | 0   | 0             |         |
|     | 28/07/14 | Yes (not new or progressive) |  | 13.35 | 37.6 | Yes | 99.6  |     | 0   | 0             |         |
|     | 29/07/14 | N/A                          |  | 11.44 | 37.8 | N/A | 100   |     | N/A | N/A           |         |
|     | 30/07/14 | No                           |  | 10.62 | 37.7 | Yes | 99.8  |     | 0   | 0             |         |

|     |          |                              |       |      |     |       |     |                  |             |
|-----|----------|------------------------------|-------|------|-----|-------|-----|------------------|-------------|
|     | 31/07/14 | No                           | 10.71 | 37.8 | Yes | 100.1 | 0   | 0                |             |
|     | 01/08/14 | No                           | 16.28 | 37.4 | No  | 99.4  | 0   | 0                |             |
|     | 02/08/14 | No                           | 11.34 | 36.6 | N/A | 97.8  | N/A | N/A              |             |
| 032 | 26/07/14 | No                           | 19.8  | 37.2 | No  | 98.9  | 0   | 0                |             |
|     | 27/07/14 | No                           | 15.6  | 37.7 | Yes | 99.8  | 0   | 0                |             |
|     | 28/07/14 | No                           | 17.11 | 37.0 | No  | 98.6  | 0   | 0                |             |
|     | 29/07/14 | N/A                          | N/A   | N/A  | N/A | N/A   | N/A | N/A              |             |
| 033 | 31/07/14 | No                           | 30.46 | 37.1 | Yes | 98.7  | 0   | 0                |             |
|     | 01/08/14 | No                           | 23.5  | 37.0 | No  | 98.6  | 0   | 3+ BKCC          |             |
|     | 02/08/14 | No                           | 20.34 | 36.9 | Yes | 98.5  | 0   | 3+ BKCC          |             |
|     | 03/08/14 | No                           | 22.14 | 37.6 | Yes | 99.7  | 0   | 3+ BKCC          |             |
| 034 | 31/07/14 | No                           | 11.64 | 36.7 | No  | 98    | 0   | 3+ Mold          |             |
|     | 01/08/14 | No                           | 17.06 | 38.3 | No  | 0     | 0   | 3+ XMAL; 3+ Mold |             |
|     | 02/08/14 | No                           | 13.08 | 37.6 | Yes | 0     | 0   | 3+ XMAL          |             |
|     | 03/08/14 | No                           | 14.21 | 37.4 | No  | 0     | 0   | 4+ XMAL          |             |
|     | 04/08/14 | No                           | 10.8  | 36.9 | Yes | 98.4  | 0   | 4+ XMAL          |             |
|     | 05/08/14 | No                           | 12.17 | 37.2 | Yes | 99    | 0   | 4+ XMAL          |             |
|     | 06/08/14 | No                           | 18.64 | 37.0 | N/A | 98.6  | N/A | N/A              |             |
| 035 | 31/07/14 | Yes (not new or progressive) | 25.11 | 37.5 | Yes | 99.5  | 0   | 2+ HFLU          |             |
|     | 01/08/14 | Yes (not new or progressive) | 21.66 | 39.3 | No  | 102.7 | 0   | 0                |             |
|     | 02/08/14 | Yes (not new or progressive) | 9.2   | 36.6 | Yes | 97.9  | 0   | 0                |             |
|     | 03/08/14 | N/A                          | 7.59  | 36.4 | N/A | 97.6  | N/A | N/A              |             |
| 036 | 03/08/14 | N/A                          | 14.8  | 39.4 | Yes | 103   | 0   | 0                |             |
|     | 04/08/14 | No                           | 9.42  | 37.7 | No  | 99.8  | 0   | 0                |             |
|     | 05/08/14 | No                           | 12.45 | 38.0 | No  | 100.4 | 0   | 0                |             |
|     | 06/08/14 | No                           | 9.26  | 38.1 | Yes | 100.6 | 0   | 0                |             |
|     | 07/08/14 | No                           | 9.71  | 38.1 | Yes | 100.6 | 0   | 0                |             |
|     | 08/08/14 | Yes (new)                    | 12.81 | 37.9 | Yes | 100.3 | VAP | 0                |             |
|     | 09/08/14 | Yes                          | 12.87 | 37.9 | No  | 100.3 | 0   | 0                |             |
|     | 10/08/14 | Yes                          | 11.52 | 37.6 | No  | 99.6  | 0   | 0                |             |
|     | 11/08/14 | Yes                          | 12.87 | 37.7 | Yes | 99.9  | VAP | 0                |             |
|     | 12/08/14 | No                           | 12.85 | 37.8 | No  | 100.1 | 0   | 0                |             |
| 037 | 07/08/14 | Yes (not new or progressive) | 15.07 | 37.5 | N/A | N/A   | N/A | N/A              |             |
|     | 08/08/14 | N/A                          | 9.82  | 37.4 | Yes | 0     | 0   | 0                |             |
|     | 09/08/14 | Yes (not new or progressive) | 15.84 | 37.1 | No  | 0     | 0   | 0                |             |
|     | 10/08/14 | Yes (not new or progressive) | 18.41 | 37.6 | Yes | 0     | 0   | 0                |             |
|     | 11/08/14 | Yes (not new or progressive) | 22.85 | 37.4 | No  | 0     | 0   | 0                |             |
|     | 12/08/14 | No                           | 25.43 | 37.2 | No  | 0     | 0   | 0                |             |
|     | 13/08/14 | No                           | 22.86 | 37.4 | No  | 99.3  | 0   | 0                |             |
|     | 14/08/14 | No                           | 21.24 | 39.1 | Yes | 102.3 | 0   | 0                |             |
|     | 15/08/14 | Yes (new)                    | 18.7  | 37.1 | No  | 98.7  | 0   | 0                |             |
|     | 16/08/14 | Yes                          | 15.28 | 37.9 | No  | 100.2 | 0   | 0                |             |
|     | 17/08/14 | Yes                          | 15.41 | 37.8 | No  | 100   | 0   | 0                |             |
|     | 18/08/14 | No                           | 12.38 | 37.9 | No  | 100.3 | 0   | 0                |             |
|     | 19/08/14 | No                           | 8.15  | 37.7 | No  | 99.8  | 0   | 0                |             |
|     | 20/08/14 | No                           | 6.66  | 37.5 | N/A | 99.5  | 0   | 0                |             |
|     | 21/08/14 | No                           | 8     | 37.8 | No  | 100   | 0   | 0                |             |
|     | 22/08/14 | No                           | 9.18  | 37.9 | No  | 100.3 | 0   | 0                |             |
|     | 23/08/14 | No                           | 15.37 | 37.8 | No  | 100   | 0   | 4+ PSA           |             |
|     | 24/08/14 | Yes (new)                    | 14.47 | 37.7 | No  | 99.8  | 0   | 4+ PSA           |             |
|     | 25/08/14 | Yes                          | 14.72 | 37.2 | Yes | 99    | VAP | 0                | 4+ PSA-ECAP |
| 038 | 10/08/14 | Yes (not new or progressive) | 21.44 | 37.4 | Yes | 99.4  | 0   | 0                |             |
|     | 11/08/14 | Yes (progressive)            | 17.59 | 37.2 | Yes | 99    | 0   | 0                |             |
|     | 12/08/14 | Yes                          | 9.01  | 37.3 | No  | 99.2  | 0   | 1+ ENTA          |             |
|     | 13/08/14 | No                           | 13.17 | 37.4 | Yes | 99.4  | 0   | 1+ ENTC          |             |
|     | 14/08/14 | No                           | 12.83 | 37.4 | No  | 99.3  | 0   | 1+ ENTC          |             |
|     | 15/08/14 | No                           | 13.57 | 37.7 | Yes | 99.8  | 0   | 2+ ENTC          |             |
|     | 16/08/14 | N/A                          | 16.72 | 37.3 | N/A | 99.2  | N/A | N/A              |             |
| 039 | 10/08/14 | Yes (not new or progressive) | 11.24 | 36.7 | No  | 0     | 0   | 0                |             |
|     | 11/08/14 | No                           | 12.62 | 36.0 | No  | 0     | 0   | 0                |             |
|     | 12/08/14 | No                           | 8.61  | 37.9 | N/A | N/A   | N/A | N/A              |             |
|     | 13/08/14 | Yes (new)                    | 12.7  | 37.4 | No  | 0     | 0   | 0                |             |
|     | 14/08/14 | Yes                          | 14.71 | 35.7 | No  | 0     | 0   | 0                |             |
|     | 15/08/14 | Yes                          | 20.16 | 36.5 | Yes | VAP   | 0   | 0                |             |
|     | 16/08/14 | No                           | 15.87 | 36.6 | N/A | N/A   | N/A | N/A              |             |
|     | 17/08/14 | N/A                          | N/A   | N/A  | N/A | N/A   | N/A | N/A              |             |
| 040 | 11/08/14 | Yes (not new or progressive) | 17.96 | 37.5 | Yes | 99.5  | 0   | 3+ ENTA          |             |
|     | 12/08/14 | Yes (not new or progressive) | 15.09 | 37.4 | No  | 99.4  | 0   | 3+ ENTA          |             |
|     | 13/08/14 | Yes (not new or progressive) | 11.22 | 37.4 | Yes | 99.3  | 0   | 3+ ENTA          |             |
|     | 14/08/14 | Yes (not new or progressive) | 8.66  | 37.7 | Yes | 99.8  | 0   | 4+ ENTA          |             |
|     | 15/08/14 | Yes (progressive)            | 11.16 | 37.9 | Yes | 100.3 | VAP | 0                | 4+ ENTA     |
|     | 16/08/14 | Yes                          | 13.61 | 38.1 | No  | 100.5 | VAP | 0                | 3+ ENTA     |
|     | 17/08/14 | No                           | 14.24 | 37.8 | Yes | 100.1 | 0   | 3+ ENTA          |             |
|     | 18/08/14 | No                           | 11.17 | 37.2 | No  | 98.9  | 0   | 3+ ENTA          |             |
|     | 19/08/14 | No                           | 11.01 | 37.8 | Yes | 100.1 | 0   | 3+ ENTA          |             |
| 041 | 11/08/14 | No                           | 17.12 | 37.6 | No  | 99.6  | 0   | 3+ ENTA          |             |
|     | 12/08/14 | No                           | 9.71  | 38.1 | No  | 100.6 | 0   | 4+ ENTA          |             |
|     | 13/08/14 | No                           | 9.82  | 37.8 | Yes | 100.1 | 0   | 1+ ENTC          |             |
|     | 14/08/14 | Yes (new)                    | 8.44  | 37.3 | Yes | 99.2  | 0   | 2+ ENTC          |             |
|     | 15/08/14 | Yes                          | 8.95  | 38.0 | Yes | 100.4 | 0   | 2+ ENTC          |             |
|     | 16/08/14 | Yes                          | 9.67  | 38.2 | No  | 100.7 | 0   | 2+ ENTC          |             |
|     | 17/08/14 | Yes                          | 11.27 | 38.0 | Yes | 100.4 | VAP | 0                | 3+ ENTC     |
|     | 18/08/14 | No                           | 12.57 | 38.7 | Yes | 101.6 | 0   | 0                |             |
|     | 19/08/14 | No                           | 13.6  | 37.0 | No  | 98.6  | 0   | 2+ ENTC          |             |
|     | 20/08/14 | Yes (new)                    | 12.86 | 38.0 | No  | 100.4 | 0   | 3+ ENTC          |             |
|     | 21/08/14 | Yes (progressive)            | 12.64 | 38.9 | Yes | 102.1 | VAP | 0                | 3+ ENTC     |
| 042 | 12/08/14 | N/A                          | 6.52  | 37.7 | Yes | 99.9  | 0   | 3+ KOX           |             |
|     | 13/08/14 | No                           | 6.45  | 37.9 | Yes | 100.3 | 0   | 1+ KOX           |             |
|     | 14/08/14 | No                           | 6.86  | 38.5 | Yes | 101.3 | 0   | 3+ KOX           |             |
|     | 15/08/14 | No                           | 6.58  | 37.8 | Yes | 100.1 | 0   | 1+ KOX           |             |
|     | 16/08/14 | No                           | 5.4   | 38.3 | Yes | 101   | N/A | N/A              |             |
|     | 17/08/14 | No                           | 5.12  | 37.9 | Yes | 100.2 | 0   | 1+ KOX; 2+ ACHD  |             |
|     | 18/08/14 | No                           | 4.87  | 37.7 | Yes | 99.8  | 2+  | 1+ KOX; 3+ ACHD  |             |
|     | 19/08/14 | No                           | 4.58  | 37.8 | Yes | 100   | 0   | 0                |             |
|     | 20/08/14 | No                           | 5.38  | 39.0 | Yes | 102.2 | 1+  | 1+ KOX; 2+ ACHD  |             |
|     | 21/08/14 | N/A                          | 6.11  | 38.4 | Yes | 101.2 | 0   | 1+ KOX; 2+ ACHD  |             |
|     | 22/08/14 | No                           | 6.41  | 38.2 | Yes | 100.8 | 0   | 2+ KOX; 2+ ACHD  |             |
|     | 23/08/14 | N/A                          | 7.91  | 37.1 | N/A | 98.8  | N/A | N/A              |             |
| 043 | 14/08/14 | Yes (not new or progressive) | 13.4  | 36.9 | No  | 98.4  | 0   | 0                |             |
|     | 15/08/14 | Yes (not new or progressive) | 22.54 | 36.6 | No  | 0     | 0   | 0                |             |
|     | 16/08/14 | N/A                          | N/A   | N/A  | N/A | N/A   | N/A | N/A              |             |
| 044 | 14/08/14 | No                           | 5.13  | 38.3 | No  | 100.9 | 0   | 0                |             |
|     | 15/08/14 | No                           | 10.28 | 36.7 | No  | 98    | 0   | 0                |             |
|     | 16/08/14 | N/A                          | N/A   | N/A  | N/A | N/A   | N/A | N/A              |             |
| 045 | 16/08/14 | Yes (not new or progressive) | 27.5  | 37.3 | Yes | 99.1  | 0   | 3+ BTSF          |             |
|     | 17/08/14 | Yes (not new or progressive) | 23.15 | 37.5 | Yes | 99.5  | 0   | 0                |             |
|     | 18/08/14 | Yes (not new or progressive) | N/A   | 37.4 | No  | 99.3  | 0   | 0                |             |
|     | 19/08/14 | Yes (not new or progressive) | 37.36 | 37.3 | No  | 99.1  | 0   | 0                |             |
|     | 20/08/14 | Yes (not new or progressive) | 37.42 | 37.9 | Yes | 100.2 | 0   | 0                |             |
|     | 21/08/14 | Yes (not new or progressive) | 35.77 | 37.4 | Yes | 99.3  | 0   | 0                |             |
|     | 22/08/14 | Yes (not new or progressive) | 60.55 | 37.2 | Yes | 98.9  | 0   | 0                |             |
|     | 23/08/14 | Yes (not new or progressive) | 39.89 | 37.7 | No  | 99.8  | 0   | 0                |             |
|     | 24/08/14 | Yes (not new or progressive) | 40.31 | 37.9 | No  | 100.3 | 0   | 0                |             |

|     |          |                              |       |      |     |       |     |         |       |
|-----|----------|------------------------------|-------|------|-----|-------|-----|---------|-------|
|     | 25/08/14 | Yes (not new or progressive) | 30.71 | 37.7 | Yes | 99.8  | 0   | 0       |       |
|     | 26/08/14 | Yes (not new or progressive) | 30.95 | 38.3 | Yes | 101   | 0   | 0       |       |
|     | 27/08/14 | Yes (not new or progressive) | 54.61 | 37.5 | Yes | 99.5  | 0   | 0       |       |
|     | 28/08/14 | Yes (not new or progressive) | 52.98 | 37.2 | Yes | 99    | 0   | 0       |       |
|     | 29/08/14 | Yes (not new or progressive) | 40.19 | 38.2 | Yes | 100.8 | 0   | 0       |       |
|     | 30/08/14 | Yes (not new or progressive) | 50.29 | 37.8 | No  | 100   | 0   | 0       |       |
|     | 31/08/14 | Yes (not new or progressive) | 50.58 | 37.3 | Yes | 99.2  | 0   | 0       |       |
|     | 01/09/14 | Yes (not new or progressive) | 33.23 | 37.4 | Yes | 99.4  | 0   | 0       |       |
|     | 02/09/14 | Yes (not new or progressive) | 28.46 | 37.5 | Yes | 99.5  | 0   | 0       |       |
|     | 03/09/14 | Yes (not new or progressive) | 23.52 | 37.4 | Yes | 99.3  | 0   | 0       |       |
|     | 04/09/14 | Yes (not new or progressive) | 16.8  | 37.1 | No  | 98.7  | 0   | 0       |       |
| 046 | 21/05/15 | Yes (not new or progressive) | 19.87 | 37.1 | Yes | 98.8  | 0   | 0       |       |
|     | 22/05/15 | Yes (not new or progressive) | 20.02 | 37.3 | Yes | 99.1  | 0   | 0       |       |
|     | 23/05/15 | Yes (not new or progressive) | 16.47 | 37.8 | N/A | 100   | N/A | N/A     |       |
| 047 | 18/08/01 | Yes (not new or progressive) | 14.43 | 37.3 | Yes | 99.1  | 0   | 0       |       |
|     | 19/08/14 | Yes (not new or progressive) | 8.45  | 37.1 | N/A | 98.8  | 0   | 0       |       |
| 048 | 20/08/14 | Yes (not new or progressive) | 22.3  | 38.1 | No  | 100.6 | 0   | 0       |       |
|     | 21/08/14 | No                           | 23.14 | 38.2 | Yes | 100.8 | 0   | 0       |       |
|     | 22/08/14 | Yes (new)                    | 25.5  | 39.5 | Yes | 103.1 | VAP | 1+ BTSC |       |
|     | 23/08/14 | Yes                          | 41.15 | 38.9 | N/A | 102.1 | VAP | N/A     |       |
|     | 24/08/14 | Yes                          | 34    | 37.9 | N/A | 100.2 | N/A | N/A     |       |
|     | 25/08/14 | Yes                          | 38.02 | 37.9 | N/A | 100.3 | N/A | N/A     |       |
|     | 26/08/14 | Yes                          | 44.74 | 39.2 | N/A | 102.5 | VAP | N/A     |       |
| 049 | 21/08/14 | Yes (not new or progressive) | 38.99 | 37.0 | No  | 0     | 0   | 0       |       |
|     | 22/08/14 | Yes (not new or progressive) | 37.69 | 37.8 | No  | 0     | 0   | 0       |       |
|     | 23/08/14 | Yes (not new or progressive) | 35.28 | 38.2 | No  | 100.8 | 0   | 0       |       |
|     | 24/08/14 | Yes (not new or progressive) | 36.56 | 38.7 | Yes | 101.6 | 0   | 0       |       |
|     | 25/08/14 | N/A                          | N/A   | N/A  | N/A | N/A   | N/A | N/A     |       |
| 050 | 22/08/14 | Yes (not new or progressive) | 16.99 | 36.6 | Yes | 97.8  | N/A | N/A     |       |
|     | 23/08/14 | Yes (not new or progressive) | 13.7  | 37.4 | No  | 99.4  | 0   | 0       |       |
|     | 24/08/14 | Yes (not new or progressive) | 12.87 | 37.1 | Yes | 98.8  | 0   | 0       |       |
|     | 25/08/14 | Yes (not new or progressive) | 11.84 | 37.4 | No  | 99.4  | 0   | 0       |       |
|     | 26/08/14 | Yes (not new or progressive) | 12.75 | 36.7 | N/A | 98    | N/A | N/A     |       |
|     | 27/08/14 | Yes (not new or progressive) | 14.54 | 37.1 | Yes | 98.8  | 0   | 2+ EC   |       |
|     | 28/08/14 | Yes (not new or progressive) | 16.43 | 37.7 | Yes | 99.8  | 0   | 0       |       |
|     | 29/08/14 | Yes (not new or progressive) | 15.21 | 37.1 | Yes | 98.7  | 0   | 2+ EC   |       |
|     | 30/08/14 | Yes (not new or progressive) | 13.97 | 37.2 | No  | 98.9  | 0   | 2+ EC   |       |
|     | 31/08/14 | Yes (not new or progressive) | 13.06 | 37.2 | No  | 99    | 0   | 0       |       |
|     | 01/09/14 | No                           | 13.84 | 37.2 | Yes | 98.9  | 0   | 1+ EC   |       |
|     | 02/09/14 | Yes (new)                    | 16.43 | 36.9 | No  | 98.4  | 0   | 1+ EC   |       |
|     | 03/09/14 | Yes                          | 15.3  | 37.3 | No  | 99.2  | 0   | 1+ EC   |       |
| 051 | 26/08/14 | Yes (not new or progressive) | 12.91 | 39.6 | Yes | 103.2 | 0   | 0       |       |
|     | 27/08/14 | Yes (not new or progressive) | 12.18 | 38.0 | Yes | 100.4 | 0   | 0       |       |
|     | 28/08/14 | Yes (not new or progressive) | 9.12  | 37.8 | Yes | 100   | 0   | 0       |       |
|     | 29/08/14 | Yes (not new or progressive) | 12    | 37.6 | N/A | 99.6  | N/A | N/A     |       |
| 052 | 26/08/14 | Yes (not new or progressive) | 9.4   | 38.8 | Yes | 101.8 | 0   | 0       |       |
|     | 27/08/14 | Yes (not new or progressive) | 7.91  | 37.8 | Yes | 100.1 | 0   | 0       |       |
|     | 28/08/14 | Yes (not new or progressive) | 7.41  | 37.4 | Yes | 99.4  | 0   | 0       |       |
|     | 29/08/14 | No                           | 5.81  | 37.4 | Yes | 99.4  | 0   | 0       |       |
|     | 30/08/14 | Yes (new)                    | 5.92  | 37.3 | No  | 99.2  | 0   | 0       |       |
|     | 31/08/14 | Yes                          | 7.85  | 37.2 | Yes | 99    | 0   | 0       |       |
|     | 01/09/14 | Yes                          | 10.66 | 37.6 | Yes | 99.6  | 1+  | 0       |       |
|     | 02/09/14 | Yes (progressive)            | 13.47 | 37.6 | N/A | 99.7  | N/A | N/A     |       |
| 053 | 27/08/14 | No                           | 20.8  | 37.2 | N/A | 99    | N/A | N/A     |       |
|     | 28/08/14 | Yes (new)                    | 17.15 | 37.2 | No  | 99    | 0   | 3+ EC   |       |
|     | 29/08/14 | Yes (progressive)            | 41.83 | 38.4 | Yes | 101.2 | VAP | 4+ EC   |       |
|     | 30/08/14 | Yes                          | 43.33 | 37.8 | N/A | 100.1 | N/A | N/A     |       |
|     | 31/08/14 | Yes                          | 44.41 | 38.5 | No  | 101.3 | VAP | 1+      | 0     |
|     | 01/09/14 | Yes                          | 21.24 | 37.6 | Yes | 99.7  | VAP | 0       | 2+ EC |
|     | 02/09/14 | Yes                          | 11.96 | 36.5 | No  | 97.7  | 3+  | 0       |       |
|     | 03/09/14 | N/A                          | N/A   | N/A  | N/A | N/A   | N/A | N/A     |       |
| 054 | 27/08/14 | No                           | 18.33 | 38.1 | Yes | 100.5 | 0   | 0       |       |
|     | 28/08/14 | Yes (new)                    | 17.76 | 38.5 | Yes | 101.3 | 0   | 0       |       |
|     | 29/08/14 | No                           | 12.77 | 37.9 | Yes | 100.2 | 0   | 0       |       |
|     | 30/08/14 | No                           | 8.26  | 37.8 | No  | 100.1 | 0   | 0       |       |
| 055 | 29/08/14 | Yes (not new or progressive) | 10.01 | 38.4 | Yes | 101.2 | 1+  | 0       |       |
|     | 30/08/14 | No                           | 8.08  | 37.8 | No  | 100   | 0   | 0       |       |
|     | 31/08/14 | Yes (new)                    | 9.21  | 37.9 | No  | 100.3 | 2+  | 0       |       |
| 056 | 30/08/14 | No                           | 15.95 | 37.2 | Yes | 98.9  | 0   | 0       |       |
|     | 31/08/14 | No                           | 21.05 | 37.3 | Yes | 99.1  | 0   | 0       |       |
|     | 01/09/14 | No                           | 21.48 | 37.4 | Yes | 0     | 0   | 0       |       |
|     | 02/09/14 | Yes (new)                    | 15.34 | 36.8 | Yes | VAP   | 0   | 0       |       |
|     | 03/09/14 | Yes                          | 10.9  | 37.1 | Yes | 0     | 0   | 0       |       |
|     | 04/09/14 | Yes                          | 11.01 | 37.0 | No  | 0     | 0   | 0       |       |
|     | 05/09/14 | Yes                          | 13.68 | 36.9 | N/A | 98.5  | N/A | N/A     |       |
| 057 | 02/09/14 | No                           | 13.72 | 39.3 | Yes | 102.8 | 0   | 0       |       |
|     | 03/09/14 | No                           | 13.75 | 37.4 | Yes | 99.4  | 0   | 0       |       |
|     | 04/09/14 | No                           | 10.47 | 37.4 | N/A | 99.4  | N/A | N/A     |       |
| 058 | 02/09/14 | No                           | 15.49 | 38.1 | No  | 100.5 | 4+  | 0       |       |
|     | 03/09/14 | Yes (new)                    | 10.67 | 38.6 | Yes | 101.5 | 4+  | 0       |       |
|     | 04/09/14 | Yes                          | 11.29 | 38.5 | Yes | 101.3 | 2+  | 2+ EC   |       |
|     | 05/09/14 | Yes                          | 8.87  | 39.4 | Yes | 102.9 | 0   | 0       |       |
|     | 06/09/14 | Yes                          | 8.75  | 38.9 | Yes | 102   | 3+  | 3+ EC   |       |
|     | 07/09/14 | Yes                          | 9.7   | 38.6 | Yes | 101.5 | 2+  | 1+ EC   |       |
|     | 08/09/14 | Yes                          | 8.11  | 38.7 | No  | 101.7 | 2+  | 1+ EC   |       |
|     | 09/09/14 | Yes                          | 10.16 | 38.8 | Yes | 101.9 | 1+  | 1+ EC   |       |
|     | 10/09/14 | Yes                          | 11.03 | 38.9 | No  | 102   | 1+  | 1+ EC   |       |
|     | 11/09/14 | Yes                          | 9.37  | 39.3 | No  | 102.7 | 1+  | 2+ EC   |       |
|     | 12/09/14 | Yes                          | 10.75 | 38.1 | Yes | 100.5 | 3+  | 0       |       |
|     | 13/09/14 | Yes                          | 10.42 | 37.9 | N/A | 100.2 | 2+  | 0       |       |
|     | 14/09/14 | Yes                          | 10.25 | 38.1 | No  | 100.6 | 1+  | 0       |       |
|     | 15/09/14 | Yes                          | 10.35 | 38.2 | Yes | 100.7 | 2+  | 0       |       |
|     | 16/09/14 | Yes                          | 11.52 | 37.8 | No  | 100   | 1+  | 0       |       |
| 059 | 03/09/14 | Yes (not new or progressive) | 26.6  | 37.0 | N/A | 98.6  | N/A | N/A     |       |
|     | 04/09/14 | Yes (not new or progressive) | 22.46 | 37.2 | Yes | 98.9  | 0   | 0       |       |
|     | 05/09/14 | Yes (not new or progressive) | 15.13 | 37.4 | Yes | 99.4  | 0   | 0       |       |
|     | 06/09/14 | Yes (not new or progressive) | 17.37 | 37.2 | Yes | 99    | 0   | 0       |       |
|     | 07/09/14 | Yes (not new or progressive) | 18.11 | 37.4 | No  | 99.4  | 0   | 0       |       |
|     | 08/09/14 | Yes (not new or progressive) | 20.37 | 37.7 | Yes | 99.8  | N/A | N/A     |       |
|     | 09/09/14 | Yes (not new or progressive) | 19.33 | 38.4 | Yes | 101.2 | 0   | 0       |       |
|     | 10/09/14 | Yes (not new or progressive) | 19.06 | 37.7 | No  | 99.8  | 0   | 0       |       |
|     | 11/09/14 | Yes (progressive)            | 21.1  | 37.8 | Yes | 100   | VAP | 0       |       |
|     | 12/09/14 | Yes                          | 19.34 | 38.4 | Yes | 101.2 | VAP | 0       |       |
|     | 13/09/14 | Yes                          | 17.11 | 38.3 | Yes | 100.9 | VAP | 0       |       |
|     | 14/09/14 | Yes                          | 19.91 | 37.9 | N/A | 100.3 | N/A | N/A     |       |
|     | 15/09/14 | Yes                          | 17.76 | 37.5 | Yes | 99.5  | VAP | 0       |       |
|     | 16/09/14 | Yes                          | 14.86 | 37.3 | Yes | 99.2  | VAP | 0       |       |
|     | 17/09/14 | Yes (progressive)            | 15.58 | 37.8 | No  | 100   | N/A | N/A     |       |
|     | 18/09/14 | Yes                          | 19.82 | 37.9 | Yes | 100.3 | VAP | 0       |       |
| 060 | 04/09/14 | No                           | 10.61 | 36.8 | Yes | 98.2  | 0   | 0       |       |
|     | 05/09/14 | No                           | 10.97 | 37.4 | Yes | 99.3  | 0   | 0       |       |
| 061 | 05/09/14 | No                           | 14.41 | 37.4 | Yes | 99.3  | N/A | N/A     |       |
|     | 06/09/14 | No                           | 16.51 | 37.6 | N/A | 99.6  | 0   | 0       |       |

|     |          |                              |       |      |     |       |         |                       |       |
|-----|----------|------------------------------|-------|------|-----|-------|---------|-----------------------|-------|
|     | 07/09/14 | No                           | 15.6  | 37.9 | No  | 100.2 | 0       | 0                     |       |
|     | 08/09/14 | Yes (new)                    | 12.1  | 38.3 | Yes | 100.9 | VAP     | 0                     |       |
| 062 | 09/09/14 | Yes (not new or progressive) | 15.16 | 37.8 | No  | 100.1 | N/A     | N/A                   |       |
|     | 10/09/14 | Yes (not new or progressive) | 20.71 | 37.8 | No  | 100   | 0       | 0                     |       |
|     | 11/09/14 | No                           | 20.26 | 38.4 | No  | 101.1 | 0       | 0                     |       |
|     | 12/09/14 | No                           | 15.04 | 38.4 | Yes | 101.2 | 0       | 0                     |       |
|     | 13/09/14 | No                           | 12.18 | 39.1 | Yes | 102.4 | 0       | 0                     |       |
|     | 14/09/14 | Yes (new)                    | 19.54 | 38.8 | No  | 101.9 | VAP     | 0                     |       |
|     | 15/09/14 | No                           | 18.94 | 38.6 | No  | 101.4 | 0       | 0                     |       |
|     | 16/09/14 | Yes (new)                    | 33.59 | 37.8 | No  | 100.1 | 0       | 0                     |       |
|     | 17/09/14 | Yes                          | 38.01 | 36.7 | No  | 0     | 0       | 0                     |       |
|     | 18/09/14 | N/A                          | N/A   | N/A  | N/A | N/A   | N/A     | N/A                   |       |
| 063 | 21/05/15 | No                           | 11.75 | 39.0 | N/A | 102.2 | N/A     | N/A                   |       |
|     | 22/05/15 | No                           | 10.24 | 38.3 | Yes | 101   | 0       | 0                     |       |
|     | 23/05/15 | Yes (new)                    | 15.2  | 38.4 | Yes | 101.2 | VAP     | 0                     |       |
|     | 24/05/15 | No                           | 12.62 | 37.8 | Yes | 100.1 | 0       | 0                     |       |
|     | 25/05/15 | Yes (new)                    | 11.28 | 38.1 | Yes | 100.6 | VAP     | 0                     |       |
|     | 26/05/15 | Yes                          | 9.71  | 38.2 | Yes | 100.7 | VAP     | 0                     |       |
|     | 27/05/15 | Yes                          | 9.21  | 38.4 | No  | 101.1 | 0       | 0                     |       |
|     | 28/05/15 | Yes                          | 9.07  | 38.8 | Yes | 101.9 | VAP     | 0                     |       |
|     | 29/05/15 | Yes                          | 10.19 | 38.3 | Yes | 100.9 | VAP     | 0                     |       |
|     | 30/05/15 | No                           | 11.37 | 37.3 | Yes | 99.2  | 0       | 0                     |       |
|     | 31/05/15 | No                           | 9.94  | 38.7 | Yes | 101.7 | 0       | 0                     |       |
|     | 01/06/15 | Yes (new)                    | 15.17 | 38.0 | Yes | 100.4 | VAP     | 0                     |       |
|     | 02/06/15 | Yes                          | 14.46 | 37.9 | No  | 100.2 | 0       | 0                     |       |
|     | 03/06/15 | Yes                          | 16.03 | 37.6 | No  | 99.7  | 0       | 0                     |       |
|     | 04/06/15 | Yes                          | 11.3  | 37.7 | N/A | 99.8  | N/A     | N/A                   |       |
| 064 | 11/09/14 | Yes (not new or progressive) | 30.24 | 36.4 | Yes | 97.6  | 1+      | 0                     |       |
|     | 12/09/14 | Yes (not new or progressive) | 33.82 | 37.6 | Yes | 0     | 0       | 0                     |       |
|     | 13/09/14 | Yes (not new or progressive) | 20.33 | 37.1 | Yes | 98.8  | 0       | 0                     |       |
|     | 14/09/14 | Yes (not new or progressive) | 16.71 | 37.0 | N/A | 98.6  | N/A     | N/A                   |       |
|     | 15/09/14 | Yes (not new or progressive) | 20.46 | 37.2 | Yes | 99    | 0       | 0                     |       |
|     | 16/09/14 | Yes (not new or progressive) | 19.83 | 36.7 | Yes | 98.1  | 0       | 0                     |       |
|     | 17/09/14 | Yes (not new or progressive) | 19.29 | 36.4 | N/A | 97.6  | N/A     | N/A                   |       |
|     | 18/09/14 | Yes (not new or progressive) | 24.71 | 37.7 | Yes | 99.8  | 0       | 0                     |       |
|     | 19/09/14 | Yes (not new or progressive) | 25.66 | 36.7 | No  | 98    | 0       | 0                     |       |
|     | 20/09/14 | Yes (not new or progressive) | 15.31 | 37.0 | No  | 98.6  | 0       | 0                     |       |
|     | 21/09/14 | Yes (not new or progressive) | 19.88 | 36.7 | Yes | 98    | 0       | 0                     |       |
|     | 22/09/14 | Yes (not new or progressive) | 21.01 | 36.7 | No  | 98.1  | 0       | 0                     |       |
|     | 23/09/14 | Yes (not new or progressive) | 18.01 | 37.7 | N/A | N/A   | N/A     | N/A                   |       |
|     | 24/09/14 | Yes (not new or progressive) | 15.73 | 36.9 | No  | 98.5  | 0       | 0                     |       |
|     | 25/09/14 | Yes (not new or progressive) | 15.22 | 37.1 | N/A | 98.7  | N/A     | N/A                   |       |
| 065 | 11/09/14 | No                           | 14.76 | 38.8 | Yes | 101.9 | N/A     | N/A                   |       |
|     | 12/09/14 | Yes (new)                    | 14.99 | 37.4 | Yes | 99.3  | 0       | 0                     |       |
|     | 13/09/14 | Yes                          | 7.39  | 37.3 | N/A | 99.1  | N/A     | N/A                   |       |
|     | 14/09/14 | Yes                          | 8.34  | 37.8 | N/A | 100.1 | N/A     | N/A                   |       |
|     | 15/09/14 | No                           | 6.51  | 36.7 | Yes | 98.1  | 0       | 0                     |       |
| 066 | 13/09/14 | Yes (not new or progressive) | 9.04  | 37.2 | No  | 99    | 0       | 0                     |       |
|     | 14/09/14 | Yes (not new or progressive) | 11.39 | 37.5 | No  | 99.5  | 0       | 0                     |       |
|     | 15/09/14 | Yes (not new or progressive) | 10.85 | 37.1 | No  | 98.8  | 0       | 0                     |       |
|     | 16/09/14 | Yes (not new or progressive) | 12.84 | 37.2 | No  | 99    | 0       | 0                     |       |
|     | 17/09/14 | Yes (not new or progressive) | 11.02 | 36.8 | N/A | 98.2  | N/A     | N/A                   |       |
| 067 | 19/09/14 | No                           | 11.89 | 38.0 | N/A | 100.4 | N/A     | N/A                   |       |
|     | 20/09/14 | No                           | 14.21 | 37.6 | No  | 99.6  | 0       | 0                     |       |
|     | 21/09/14 | Yes (new)                    | 12.56 | 37.6 | Yes | 99.7  | VAP     | 0                     |       |
|     | 22/09/14 | Yes                          | 14.32 | 37.8 | No  | 100   | 0       | 0                     |       |
|     | 23/09/14 | Yes                          | 13.43 | 37.9 | Yes | 100.3 | VAP     | 0                     |       |
|     | 24/09/14 | Yes                          | 11.46 | 39.4 | No  | 102.9 | VAP     | 0                     |       |
|     | 25/09/14 | Yes                          | 28.1  | 38.3 | No  | 101   | VAP     | 0                     |       |
|     | 26/09/14 | Yes                          | 24.71 | 37.9 | Yes | 100.3 | VAP     | 0                     |       |
|     | 27/09/14 | Yes                          | 21.42 | 37.4 | Yes | 99.3  | VAP     | 0                     |       |
|     | 28/09/14 | Yes                          | 18.05 | 37.6 | No  | 99.7  | 0       | 0                     |       |
|     | 29/09/14 | Yes                          | 17.34 | 36.9 | No  | 98.5  | 0       | 0                     |       |
|     | 30/09/14 | Yes                          | 17.25 | 37.9 | No  | 100.3 | 0       | 0                     |       |
|     | 01/10/14 | Yes                          | 15.29 | 37.8 | No  | 100.1 | 0       | 0                     |       |
|     | 02/10/14 | Yes                          | 18.18 | 38.3 | N/A | 100.9 | VAP     | 0                     |       |
|     | 03/10/14 | N/A                          | N/A   | N/A  | N/A | N/A   | N/A     | N/A                   |       |
| 068 | 19/09/14 | No                           | 14.34 | 37.0 | N/A | N/A   | N/A     | N/A                   |       |
|     | 20/09/14 | No                           | 8.7   | 37.8 | No  | 0     | 1+      | PSA                   |       |
|     | 21/09/14 | No                           | 14.72 | 37.5 | N/A | N/A   | N/A     | N/A                   |       |
| 069 | 20/09/14 | No                           | 20.68 | 37.9 | Yes | 100.3 | 0       | 0                     |       |
|     | 21/09/14 | No                           | 11.89 | 37.7 | Yes | 99.8  | 0       | 3+ PSA; 3+ PSA (OMOR) |       |
|     | 22/09/14 | Yes (new)                    | 6.05  | 37.1 | No  | 98.8  | 0       | 2+ PSA; 2+ PSA (OMOR) |       |
|     | 23/09/14 | N/A                          | N/A   | N/A  | N/A | N/A   | N/A     | N/A                   |       |
| 070 | 21/09/14 | No                           | 18.4  | 37.6 | Yes | 99.7  | 0       | 0                     |       |
|     | 22/09/14 | No                           | 16.03 | 37.4 | No  | 99.3  | 0       | 0                     |       |
|     | 23/09/14 | No                           | 13.12 | 37.1 | N/A | 98.8  | N/A     | N/A                   |       |
| 071 | 22/09/14 | Yes (not new or progressive) | 3.98  | 38.4 | No  | 101.2 | 0       | 0                     |       |
|     | 23/09/14 | Yes (not new or progressive) | 7.28  | 37.9 | No  | 0     | 0       | 0                     |       |
|     | 24/09/14 | Yes (not new or progressive) | 4.68  | 38.5 | No  | 0     | 2+      | EC                    |       |
|     | 25/09/14 | Yes (not new or progressive) | 1.22  | 38.9 | N/A | N/A   | N/A     | N/A                   |       |
|     | 26/09/14 | Yes (not new or progressive) | 13.53 | 36.8 | N/A | N/A   | N/A     | N/A                   |       |
| 072 | 21/05/15 | Yes (not new or progressive) | 14.49 | 37.8 | Yes | 100   | 1+      | 0                     |       |
|     | 22/05/15 | Yes (not new or progressive) | 16.15 | 38.4 | N/A | 101.1 | N/A     | N/A                   |       |
|     | 23/05/15 | Yes (not new or progressive) | 12.82 | 39.2 | N/A | 102.6 | N/A     | N/A                   |       |
| 073 | 25/09/14 | Yes (not new or progressive) | 11.88 | 38.0 | No  | 0     | 0       | 0                     |       |
|     | 26/09/14 | No                           | 12.4  | 38.4 | Yes | 101.1 | 0       | 0                     |       |
|     | 27/09/14 | No                           | 15.97 | 37.3 | Yes | 99.2  | 0       | 0                     |       |
|     | 28/09/14 | No                           | 8.08  | 37.6 | Yes | 99.7  | 3+      | 0                     |       |
|     | 29/09/14 | No                           | 7.08  | 38.5 | Yes | 101.3 | 3+      | 0                     |       |
|     | 30/09/14 | No                           | 12.7  | 39.2 | Yes | 102.6 | 3+      | 0                     |       |
|     | 01/10/14 | No                           | N/A   | 37.8 | Yes | 100.1 | 2+      | 0                     | SAUR  |
|     | 02/10/14 | No                           | 13.96 | 39.2 | No  | 102.6 | 0       | 0                     |       |
|     | 03/10/14 | No                           | 17.49 | 38.2 | Yes | 100.8 | 0       | 0                     |       |
|     | 04/10/14 | Yes (new)                    | 16.86 | 37.7 | Yes | 99.8  | VAP     | 0                     |       |
|     | 05/10/14 | Yes                          | 17.18 | 37.7 | No  | 99.8  | 1+      | 0                     |       |
|     | 06/10/14 | Yes                          | 17.32 | 38.2 | No  | 100.8 | VAP     | 3+                    | 0     |
|     | 07/10/14 | No                           | 15.82 | 37.8 | N/A | 100   | N/A     | N/A                   |       |
| 074 | 25/09/14 | No                           | 12.48 | 37.4 | No  | 99.3  | 0       | 2+ PSA                |       |
|     | 26/09/14 | No                           | 10.98 | 37.1 | Yes | 98.7  | 0       | 2+ PSA                |       |
|     | 27/09/14 | No                           | 10.07 | 38.3 | Yes | 100.9 | 0       | 3+ PSA                |       |
| 075 | 26/09/14 | Yes (not new or progressive) | 8.94  | 38.4 | Yes | 101.1 | 2+      | 0                     |       |
|     | 27/09/14 | Yes (not new or progressive) | 10.49 | 37.7 | N/A | 99.8  | N/A     | N/A                   |       |
| 076 | 27/09/14 | Yes (not new or progressive) | 13.75 | 34.1 | Yes | N/A   | N/A     | N/A                   | HFLU  |
|     | 28/09/14 | Yes (not new or progressive) | 3.99  | 37.0 | Yes | 0     | 3+ HFLU | 0                     |       |
|     | 29/09/14 | Yes (not new or progressive) | N/A   | 37.6 | Yes | 0     | 0       | 0                     |       |
|     | 30/09/14 | Yes (not new or progressive) | 21.24 | 37.8 | Yes | 0     | 0       | 0                     |       |
|     | 01/10/14 | Yes (progressive)            | 27.08 | 38.0 | Yes | VAP   | 0       | 0                     |       |
|     | 02/10/14 | Yes                          | 22.55 | 36.4 | No  | 0     | 0       | 0                     |       |
|     | 03/10/14 | Yes                          | 21.21 | 36.7 | Yes | VAP   | 0       | 0                     |       |
|     | 04/10/14 | Yes                          | 23.24 | 36.8 | Yes | 98.2  | VAP     | 0                     | 2+ EC |

|     |          |                              |       |          |       |            |                     |         |
|-----|----------|------------------------------|-------|----------|-------|------------|---------------------|---------|
|     | 05/10/14 | N/A                          | N/A   | N/A N/A  |       | N/A        | N/A                 |         |
| 077 | 23/05/15 | No                           | 11.62 | 37.9 Yes | 100.2 | 0          | 0                   |         |
|     | 24/05/15 | No                           | 13.71 | 38.3 Yes | 100.9 | 0          | 0                   |         |
|     | 25/05/15 | Yes (new)                    | 12.01 | 37.7 No  | 99.9  | 0          | 2+ ENTC; 3+ HFLU    |         |
|     | 26/05/15 | Yes                          | 11.11 | 37.9 Yes | 100.2 | VAP        | 3+ ENTC; 4+ HFLU    |         |
|     | 27/05/15 | Yes                          | 12.41 | 38.3 Yes | 100.9 | VAP        | 2+ ENTC; 4+ HFLU    |         |
|     | 28/05/15 | No                           | 11.53 | 37.8 Yes | 100.1 | 4+         | 3+ ENTC             |         |
|     | 29/05/15 | No                           | 12.49 | 37.4 Yes | 99.3  | 4+         | 3+ ENTC             |         |
|     | 30/05/15 | Yes (new)                    | 12.62 | 38.9 Yes | 102   | VAP        | 3+                  | 4+ ENTC |
|     | 31/05/15 | Yes                          | 21.12 | 38.8 Yes | 101.8 | VAP        | 0                   | 4+ ENTC |
|     | 01/06/15 | Yes                          | 13.91 | 37.7 N/A | 99.8  | N/A        | N/A                 |         |
|     | 02/06/15 | No                           | 11.63 | 37.3 Yes | 99.1  | 0          | 3+ ENTC             |         |
|     | 03/06/15 | No                           | 12.18 | 37.7 N/A | 99.8  | N/A        | N/A                 |         |
|     | 04/06/15 | No                           | 12.58 | 37.3 Yes | 99.1  | 3+         | 0                   |         |
|     | 05/06/15 | No                           | 12.1  | 36.9 N/A | 98.4  | 3+         | 2+ ENTC             |         |
|     | 06/06/15 | No                           | 12    | 37.5 Yes | 99.5  | 3+         | 2+ ENTC             |         |
|     | 07/06/15 | No                           | 11.88 | 37.4 N/A | 99.3  | N/A        | N/A                 |         |
|     | 08/06/15 | No                           | 10.51 | 38.3 Yes | 100.9 | 1+         | 1+ ENTC             |         |
|     | 09/06/15 | No                           | 12.15 | 37.8 No  | 100   | 4+         | 4+ ENTC             |         |
|     | 10/06/15 | No                           | 9.61  | 37.5 Yes | 99.5  | 4+         | 2+ ENTC             |         |
|     | 11/06/15 | No                           | 10.36 | 38.4 Yes | 101.1 | 4+         | 2+ ENTC             |         |
|     | 12/06/15 | No                           | 14.51 | 37.8 N/A | 100.1 | N/A        | N/A                 |         |
| 078 | 27/09/14 | No                           | 18.88 | 38.2 Yes |       | 2+         | 0                   |         |
|     | 28/09/14 | No                           | 10.75 | 38.0 Yes |       | 3+         | 0                   |         |
|     | 29/09/14 | No                           | 8.35  | 37.4 N/A | 99.4  | N/A        | N/A                 |         |
| 079 | 27/09/14 | No                           | 2.56  | N/A No   |       | 0          | 4+ KP               |         |
|     | 28/09/14 | N/A                          | N/A   | N/A N/A  |       | N/A        | N/A                 |         |
| 080 | 28/09/14 | Yes (not new or progressive) | 7.9   | 37.1 Yes | 98.7  | 3+         | 2+ KP; 2+ KP (OMOR) |         |
|     | 29/09/14 | Yes (not new or progressive) | 8.37  | 37.2 N/A | 98.9  | N/A        | N/A                 |         |
|     | 30/09/14 | N/A                          | N/A   | N/A Yes  |       | N/A        | N/A                 |         |
| 081 | 30/09/14 | No                           | 19.17 | 37.6 Yes |       | 2+         | 0                   |         |
|     | 01/10/14 | No                           | 13.42 | 37.3 Yes |       | 0          | 0                   |         |
|     | 02/10/14 | No                           | 12.17 | 36.8 Yes |       | 0          | 0                   |         |
|     | 03/10/14 | No                           | 12.49 | 38.1 Yes |       | 1+         | 0                   |         |
|     | 04/10/14 | No                           | 11.97 | 37.2 No  |       | 1+         | 0                   |         |
|     | 05/10/14 | Yes (new)                    | 12.1  | 37.4 Yes |       | VAP        | 1+                  | 0       |
|     | 06/10/14 | No                           | 11.95 | 37.5 Yes | 99.5  | 0          | 0                   |         |
|     | 07/10/14 | N/A                          | 10.87 | 37.1 N/A | 98.7  | N/A        | N/A                 |         |
| 082 | 01/10/14 | N/A                          | 34.26 | 38.9 Yes | 102   | N/A        | N/A                 |         |
|     | 02/10/14 | Yes (not new or progressive) | 22.17 | 39.6 Yes | 103.3 | 0          | 0                   |         |
|     | 03/10/14 | N/A                          | 19.93 | 37.1 N/A | 98.8  | N/A        | N/A                 |         |
|     | 04/10/14 | N/A                          | N/A   | N/A N/A  |       | N/A        | N/A                 |         |
| 083 | 03/10/14 | No                           | 13.53 | 38.1 Yes |       | 0          | 0                   |         |
|     | 04/10/14 | Yes (new)                    | 10.54 | 37.9 N/A |       | N/A        | N/A                 |         |
| 084 | 03/10/14 | Yes (not new or progressive) | 25.2  | 38.0 Yes | 100.4 | 0          | 0                   |         |
|     | 04/10/14 | Yes (not new or progressive) | 40.5  | 38.2 Yes | 100.8 | 0          | 0                   |         |
|     | 05/10/14 | Yes (not new or progressive) | 45.12 | 37.4 Yes |       | 0          | 0                   |         |
|     | 06/10/14 | No                           | 42.43 | 37.3 Yes |       | 0          | 0                   |         |
|     | 07/10/14 | No                           | 37.64 | 37.8 Yes | 100   | 0          | 0                   |         |
|     | 08/10/14 | Yes (new)                    | 31.02 | 38.2 No  | 100.8 | VAP        | 0                   | 0       |
|     | 09/10/14 | Yes                          | 23.13 | 38.9 Yes | 102.1 | VAP        | 0                   | 0       |
|     | 10/10/14 | No                           | 21.26 | 37.6 No  | 99.6  | 0          | 0                   |         |
| 085 | 04/10/14 | No                           | 8.35  | 38.0 N/A | 100.4 | N/A        | N/A                 |         |
|     | 05/10/14 | No                           | 10.63 | 37.7 Yes | 99.8  | 0          | 3+ SERM             |         |
|     | 06/10/14 | No                           | 8.05  | 37.5 Yes | 99.5  | 0          | 4+ SERM             |         |
|     | 07/10/14 | No                           | 6.37  | 37.3 Yes | 99.1  | 0          | 4+ SERM             |         |
|     | 08/10/14 | No                           | 9.53  | 38.2 No  | 100.7 | 3+         | 3+ SERM             |         |
| 086 | 05/10/14 | Yes (not new or progressive) | 7.75  | 35.4 No  |       | 0          | 0                   |         |
|     | 06/10/14 | Yes (not new or progressive) | 10.6  | 36.4 No  |       | 0          | 0                   |         |
|     | 07/10/14 | No                           | 25.5  | 36.7 No  |       | 0          | 0                   |         |
|     | 08/10/14 | No                           | 28.17 | 37.4 N/A | 99.4  | N/A        | N/A                 |         |
| 087 | 08/10/14 | Yes (not new or progressive) | 13.95 | 37.6 No  | 99.7  | 0          | 0                   |         |
|     | 09/10/14 | Yes (progressive)            | 12.49 | 37.9 Yes |       | 0          | 0                   |         |
|     | 10/10/14 | Yes                          | 8.04  | 36.7 N/A |       | N/A        | N/A                 |         |
| 088 | 08/10/14 | No                           | 11.63 | 37.2 N/A | 99    | N/A        | N/A                 |         |
|     | 09/10/14 | No                           | 8.19  | 38.1 Yes | 100.5 | 4+         | 0                   |         |
|     | 10/10/14 | Yes (new)                    | 8.28  | 38.6 Yes | 101.5 | VAP        | 4+ (MORP2)          | 0       |
|     | 11/10/14 | Yes                          | 7.94  | 39.1 Yes | 102.4 | VAP        | 4+ (MORP2)          | 0       |
|     | 12/10/14 | Yes                          | 10.31 | 39.1 Yes | 102.3 | VAP        | 4+ (MORP2)          | 0       |
|     | 13/10/14 | Yes                          | 9.99  | 38.8 No  | 101.8 | 0          | 0                   |         |
|     | 14/10/14 | Yes                          | 9.07  | 38.3 Yes | 101   | VAP        | 3+                  | 0       |
|     | 15/10/14 | Yes                          | 10.73 | 38.9 Yes | 102.1 | VAP        | 2+                  | 0       |
|     | 16/10/14 | Yes                          | 7.82  | 39.7 N/A | 103.5 | N/A        | N/A                 |         |
|     | 17/10/14 | Yes                          | 8.5   | 39.0 N/A | 102.2 | N/A        | N/A                 |         |
| 089 | 09/10/14 | Yes (not new or progressive) | 6.53  | 39.1 Yes | 102.3 | 0          | 0                   |         |
|     | 10/10/14 | Yes (not new or progressive) | 8.62  | 39.3 Yes | 102.8 | 0          | 0                   |         |
|     | 11/10/14 | Yes (not new or progressive) | 7.25  | 39.2 Yes | 102.6 | 0          | 0                   |         |
|     | 12/10/14 | Yes (not new or progressive) | 6.63  | 38.7 Yes | 101.7 | N/A        | N/A                 |         |
|     | 13/10/14 | Yes (not new or progressive) | 6.16  | 39.3 No  | 102.7 | 0          | 0                   |         |
|     | 14/10/14 | No                           | 5.22  | 39.1 Yes | 102.4 | 0          | 0                   |         |
|     | 15/10/14 | Yes (new)                    | 8.04  | 38.2 N/A | 100.7 | 0          | 0                   |         |
|     | 16/10/14 | Yes                          | 8.61  | 38.2 Yes | 100.8 | VAP        | N/A                 | N/A     |
|     | 17/10/14 | Yes                          | 9     | 38.8 Yes | 101.8 | VAP        | 0                   | 0       |
|     | 18/10/14 | Yes                          | 8.94  | 38.1 No  | 100.5 | 0          | 0                   |         |
|     | 19/10/14 | Yes                          | 9     | 37.4 Yes | 99.4  | 0          | 0                   |         |
|     | 20/10/14 | Yes                          | 7.74  | 37.4 No  | 99.4  | 0          | 0                   |         |
|     | 21/10/14 | N/A                          | N/A   | 37.3 No  | 99.2  | 0          | 0                   |         |
|     | 22/10/14 | No                           | 8.45  | 37.6 No  | 99.7  | 0          | 0                   |         |
|     | 23/10/14 | No                           | 7.78  | 37.3 Yes | 99.1  | 0          | 0                   |         |
| 090 | 10/10/14 | No                           | 11.76 | 38.9 Yes | 102   | 3+ (MORP2) | 0                   |         |
|     | 11/10/14 | No                           | 20.88 | 38.5 Yes | 101.3 | 4+ (MORP2) | 0                   |         |
|     | 12/10/14 | Yes (new)                    | 20.59 | 38.2 Yes | 100.8 | VAP        | 4+                  | 0       |
|     | 13/10/14 | Yes                          | 16.57 | 38.6 No  | 101.5 | VAP        | 4+                  | 0       |
|     | 14/10/14 | Yes                          | 13.07 | 39.3 Yes | 102.7 | VAP        | 4+                  | 0       |
|     | 15/10/14 | Yes                          | 17.42 | 37.7 N/A | 99.8  | N/A        | N/A                 |         |
|     | 16/10/14 | Yes                          | 16.58 | 37.8 N/A | 100.1 | N/A        | N/A                 |         |
|     | 17/10/14 | Yes                          | 12.32 | 38.1 N/A | 100.6 | VAP        | N/A                 | N/A     |
|     | 18/10/14 | Yes                          | 12.09 | 38.0 N/A | 100.4 | N/A        | N/A                 |         |
|     | 19/10/14 | No                           | 18.67 | 37.8 Yes | 100.1 | N/A        | N/A                 |         |
|     | 20/10/14 | No                           | 20.9  | 37.5 N/A | 99.5  | N/A        | N/A                 |         |
|     | 21/10/14 | No                           | 15.39 | 37.3 N/A | 99.2  | N/A        | N/A                 |         |
| 091 | 10/10/14 | No                           | 8.42  | 38.7 N/A | 101.7 | 0          | 0                   |         |
|     | 11/10/14 | N/A                          | 9.95  | 39.4 Yes | 102.9 | 0          | 0                   |         |
|     | 12/10/14 | No                           | 9.7   | 37.3 Yes | 99.2  | 0          | 0                   |         |
| 092 | 10/10/14 | No                           | 7.11  | 36.8 Yes |       | 4+         | 0                   |         |
|     | 11/10/14 | No                           | 15.68 | 37.8 N/A |       | N/A        | N/A                 |         |
| 093 | 10/10/14 | Yes (not new or progressive) | 6.23  | 37.2 No  | 99    | 0          | 0                   |         |
|     | 11/10/14 | Yes (progressive)            | 6.69  | 37.8 Yes | 100   | 0          | 3+ KOX              |         |
|     | 12/10/14 | No                           | 6.08  | 37.9 Yes | 100.2 | 0          | 0                   |         |
|     | 13/10/14 | Yes (new)                    | 7.17  | 38.9 No  | 102.1 | 0          | 0                   |         |
|     | 14/10/14 | Yes                          | 9.29  | 38.1 Yes | 100.6 | VAP        | 0                   | 0       |
|     | 15/10/14 | Yes                          | 9.47  | 38.1 Yes | 100.6 | VAP        | 0                   | 0       |

|     |          |                              |       |      |     |       |     |     |                  |
|-----|----------|------------------------------|-------|------|-----|-------|-----|-----|------------------|
|     | 16/10/14 | Yes                          | 8.08  | 38.2 | Yes | 100.8 | VAP | 0   | 0                |
|     | 17/10/14 | Yes                          | 8.71  | 37.9 | Yes | 100.2 |     | 0   | 0                |
|     | 18/10/14 | Yes                          | 8.81  | 38.1 | No  | 100.6 |     | 0   | 0                |
|     | 19/10/14 | Yes                          | 8.47  | 38.0 | N/A | 100.4 | N/A | N/A |                  |
|     | 20/10/14 | Yes                          | 8.35  | 38.1 | No  | 100.5 |     | 0   | 0                |
|     | 21/10/14 | Yes                          | 10.42 | 37.9 | No  | 100.3 |     | 0   | 0                |
|     | 22/10/14 | Yes                          | N/A   | 38.1 | No  | 100.5 |     | 0   | 0                |
|     | 23/10/14 | Yes                          | 13.61 | 37.4 | Yes | 99.4  | VAP | 0   | 0                |
|     | 24/10/14 | Yes                          | 12.81 | 37.9 | Yes | 100.3 | VAP | 0   | 0                |
|     | 25/10/14 | Yes                          | 12.28 | 38.2 | Yes | 100.8 | VAP | 0   | 0                |
| 094 | 12/10/14 | Yes (not new or progressive) | 8.59  | 37.0 | Yes |       |     | 0   | 0                |
|     | 13/10/14 | Yes (not new or progressive) | 8.13  | 37.9 | N/A |       |     | N/A | N/A              |
| 095 | 13/10/14 | No                           | 16.75 | 37.0 | No  | 98.6  |     | 0   | 0                |
|     | 14/10/14 | No                           | 5.75  | 38.2 | Yes | 100.8 |     | 0   | 0                |
|     | 15/10/14 | No                           | 13.29 | 37.5 | N/A | 99.5  | N/A | N/A |                  |
| 096 | 16/10/14 | No                           | 14.82 | 38.3 | Yes | 101   |     | 0   | 2+ KP            |
|     | 17/10/14 | No                           | 16.41 | 39.0 | Yes | 102.2 |     | 0   | 2+ KP            |
|     | 18/10/14 | No                           | 19.78 | 39.7 | Yes | 103.5 |     | 0   | 2+ KP            |
|     | 19/10/14 | Yes (new)                    | 20.34 | 39.7 | Yes | 103.5 | VAP | 0   | 2+ KP            |
|     | 20/10/14 | Yes                          | 17.98 | 39.4 | No  | 103   | VAP | 0   | 3+ KP            |
|     | 21/10/14 | No                           | 17.8  | 39.6 | No  |       |     | 0   | 2+ KP            |
|     | 22/10/14 | No                           | 21.03 | 39.2 | No  |       |     | 0   | 2+ KP            |
|     | 23/10/14 | No                           | 23.49 | 37.6 | Yes |       |     | 0   | 0                |
|     | 24/10/14 | Yes (new)                    | 15.41 | 37.9 | Yes |       | VAP | 0   | 0                |
|     | 25/10/14 | Yes                          | 20.84 | 37.2 | Yes |       | VAP | 0   | 2+ KP            |
|     | 26/10/14 | Yes                          | 24.95 | 36.8 | Yes |       | VAP | 0   | 2+ KP            |
|     | 27/10/14 | Yes                          | 18.19 | 36.9 | No  |       |     | 0   | 3+ KP            |
|     | 28/10/14 | Yes                          | 14.09 | 36.9 | Yes |       | VAP | 0   | 2+ KP            |
|     | 29/10/14 | Yes                          | 9.43  | 37.3 | N/A |       |     | N/A | N/A              |
| 097 | 16/10/14 | Yes (not new or progressive) | 30.54 | 37.2 | No  | 98.9  |     | 0   | 2+ KP; 1+ EC     |
|     | 17/10/14 | No                           | 25.05 | 36.0 | No  |       |     | 0   | 0                |
|     | 18/10/14 | No                           | 16.61 | 37.0 | Yes | 98.6  |     | 0   | 0                |
|     | 19/10/14 | No                           | 17.11 | 37.2 | Yes | 98.9  |     | 0   | 0                |
|     | 20/10/14 | No                           | 21.38 | 37.2 | No  | 99    |     | 0   | 2+ ACHX          |
|     | 21/10/14 | No                           | 36.79 | 36.9 | No  | 98.5  |     | 0   | 2+ ACHX          |
|     | 22/10/14 | No                           | 40.63 | 37.1 | Yes | 98.7  |     | 0   | 0                |
| 098 | 17/10/14 | No                           | 13.61 | 37.6 | Yes | 99.6  |     | 0   | 0                |
|     | 18/10/14 | No                           | 12.29 | 37.4 | Yes | 99.4  |     | 0   | 0                |
|     | 19/10/14 | No                           | 10.89 | 37.3 | Yes | 99.2  |     | 0   | 0                |
|     | 20/10/14 | Yes (new)                    | 10.99 | 38.1 | Yes | 100.6 | VAP | 0   | 4+ HFLU; 3+ BTSF |
|     | 21/10/14 | Yes                          | 13.73 | 37.8 | Yes | 100   | VAP | 0   | 4+ HFLU          |
|     | 22/10/14 | Yes                          | 12.1  | 38.5 | Yes | 101.3 | VAP | 0   | 4+ HFLU; 4+ BTSF |
|     | 23/10/14 | No                           | 14.06 | 38.7 | N/A | 101.6 | N/A | N/A | N/A              |
|     | 24/10/14 | No                           | 15.32 | 37.9 | Yes | 100.2 |     | 0   | 4+ HFLU; 4+ BTSF |
|     | 25/10/14 | No                           | 13.36 | 37.8 | Yes | 100   |     | 0   | 0                |
|     | 26/10/14 | Yes (new)                    | 11.83 | 37.3 | No  | 99.1  |     | 0   | 0                |
|     | 27/10/14 | Yes                          | 11.39 | 38.6 | Yes | 101.4 | VAP | 0   | 0                |
|     | 28/10/14 | Yes                          | 14.6  | 38.1 | Yes | 100.5 | VAP | 0   | 0                |
|     | 29/10/14 | Yes                          | 11.28 | 38.1 | No  | 100.5 | VAP | 0   | 0                |
|     | 30/10/14 | No                           | 10.45 | 37.6 | Yes | 99.6  |     | 0   | 0                |
| 099 | 20/10/14 | No                           | 17.54 | 38.6 | N/A | 101.4 |     | 0   | 0                |
|     | 21/10/14 | No                           | 18.31 | 37.6 | No  | 99.6  |     | 0   | 0                |
|     | 22/10/14 | Yes (new)                    | 13.48 | 37.0 | Yes | 98.6  | VAP | 0   | 0                |
|     | 23/10/14 | Yes                          | 14.66 | 37.7 | N/A | 99.9  | N/A | N/A |                  |
|     | 24/10/14 | Yes                          | 10.87 | 37.6 | Yes | 99.6  |     | 0   | 0                |
|     | 25/10/14 | Yes                          | 12.12 | 37.7 | Yes | 99.8  | VAP | 0   | 0                |
|     | 26/10/14 | Yes                          | 14.2  | 38.7 | Yes | 101.6 | VAP | 0   | 0                |
|     | 27/10/14 | Yes                          | 14.59 | 38.2 | Yes | 100.7 | VAP | 0   | 0                |
|     | 28/10/14 | Yes                          | 14.35 | 37.7 | No  | 99.9  |     | 0   | 0                |
|     | 29/10/14 | Yes                          | 12.63 | 37.8 | Yes | 100   | VAP | 0   | 0                |
|     | 30/10/14 | Yes                          | 13.32 | 37.7 | N/A | 99.9  |     | N/A | N/A              |
| 100 | 22/10/14 | No                           | 14.73 | 38.7 | N/A | 101.6 |     | N/A | N/A              |
|     | 23/10/14 | No                           | 7.01  | 37.3 | Yes | 99.1  |     | 0   | 0                |
| 101 | 24/10/14 | No                           | 32.03 | 36.4 | N/A | 97.6  |     | N/A | N/A              |
|     | 25/10/14 | No                           | 6.58  | 36.7 | Yes | 98    |     | 0   | 0                |
|     | 26/10/14 | No                           | 4.3   | 36.4 | Yes | 97.5  |     | 0   | 0                |
|     | 27/10/14 | No                           | 4.38  | 36.7 | N/A | 98.1  |     | N/A | N/A              |
|     | 28/10/14 | No                           | 10.73 | 37.2 | N/A | 98.9  |     | N/A | N/A              |
|     | 29/10/14 | N/A                          | 6.4   | 36.7 | N/A | 98    |     | N/A | N/A              |
| 102 | 24/10/14 | Yes (not new or progressive) | 24.47 | 37.2 | N/A | 99    |     | N/A | N/A              |
|     | 25/10/14 | Yes (not new or progressive) | 27.22 | 37.6 | No  | 99.6  |     | 0   | 1+ ENTC          |
|     | 26/10/14 | Yes (not new or progressive) | 17.73 | 37.4 | No  | 99.4  |     | 0   | 0                |
|     | 27/10/14 | Yes (not new or progressive) | 12.24 | 37.7 | N/A | 99.9  |     | N/A | N/A              |
|     | 28/10/14 | Yes (not new or progressive) | 11.95 | 37.6 | Yes | 99.6  |     | 0   | 0                |
|     | 29/10/14 | Yes (not new or progressive) | 14.33 | 37.7 | No  | 99.9  |     | 0   | 2+ ENTC          |
|     | 30/10/14 | No                           | 14.65 | 37.5 | Yes | 99.5  |     | 0   | 0                |
| 103 | 25/10/14 | No                           | 7.69  | 36.6 | Yes |       |     | 3+  | 3+ EC            |
|     | 26/10/14 | N/A                          | 9.68  | 36.4 | N/A | 97.6  |     | N/A | N/A              |
| 104 | 25/10/14 | Yes (not new or progressive) | 16    | 37.7 | No  | 99.8  |     | 0   | 0                |
|     | 26/10/14 | Yes (not new or progressive) | 18.59 | 36.8 | No  | 98.3  |     | 0   | 0                |
|     | 27/10/14 | Yes (not new or progressive) | 16.63 | 37.1 | Yes | 98.8  |     | 0   | 0                |
|     | 28/10/14 | Yes (not new or progressive) | 12.35 | 37.2 | Yes | 98.9  |     | 0   | 0                |
|     | 29/10/14 | Yes (progressive)            | 13.95 | 37.6 | No  | 99.6  |     | 0   | 3+ PSA           |
|     | 30/10/14 | No                           | 16.15 | 37.7 | Yes | 99.8  |     | 0   | 0                |
|     | 31/10/14 | Yes (new)                    | 18.61 | 37.3 | Yes | 99.2  | VAP | 0   | 0                |
|     | 01/11/14 | No                           | 15.41 | 37.3 | Yes | 99.1  |     | 0   | 0                |
|     | 02/11/14 | Yes (new)                    | 15.6  | 38.2 | Yes | 100.7 | VAP | 0   | 0                |
|     | 03/11/14 | Yes                          | 14.87 | 38.6 | No  | 101.5 | VAP | 0   | 0                |
|     | 04/11/14 | Yes                          | 22.43 | 38.8 | No  | 101.9 | VAP | 0   | 0                |
|     | 05/11/14 | Yes                          | 13.86 | 39.3 | No  | 102.8 | VAP | 0   | 0                |
|     | 06/11/14 | Yes                          | 11.37 | 39.6 | Yes | 103.2 | VAP | 0   | 0                |
|     | 07/11/14 | Yes                          | 20.44 | 38.1 | Yes |       | VAP | 0   | 0                |
|     | 08/11/14 | No                           | 20.48 | 37.9 | N/A |       |     | N/A | N/A              |
|     | 09/11/14 | Yes (new)                    | 19.06 | 37.9 | N/A |       |     | N/A | N/A              |
|     | 10/11/14 | Yes                          | 18.26 | 38.4 | Yes |       | VAP | N/A | N/A              |
|     | 11/11/14 | Yes                          | 23.6  | 38.4 | Yes |       | VAP | 0   | 0                |
|     | 12/11/14 | Yes                          | 25.62 | 38.3 | N/A |       | VAP | N/A | N/A              |
|     | 13/11/14 | N/A                          | N/A   | N/A  | N/A |       |     | N/A | N/A              |
| 105 | 26/10/14 | Yes (not new or progressive) | 39.45 | 37.8 | Yes | 100.1 |     | N/A | N/A              |
|     | 27/10/14 | Yes (not new or progressive) | 40.84 | 37.7 | N/A | 99.8  |     | N/A | N/A              |
|     | 28/10/14 | Yes (not new or progressive) | 45.43 | 37.2 | N/A | 99    |     | N/A | N/A              |
|     | 29/10/14 | Yes (not new or progressive) | 56.2  | 37.7 | No  | 99.8  |     | 2+  | 0                |
|     | 30/10/14 | Yes (not new or progressive) | 55.2  | 37.6 | No  | 99.6  |     | 3+  | 0                |
|     | 31/10/14 | No                           | 44.16 | 37.6 | Yes | 99.6  |     | 1+  | 0                |
| 106 | 27/10/14 | Yes (not new or progressive) | 27.43 | 39.0 | Yes | 102.2 |     | 0   | 2+ PSA           |
|     | 28/10/14 | Yes (not new or progressive) | 23.63 | 36.6 | N/A | 97.8  |     | 0   | 3+ PSA           |
|     | 29/10/14 | Yes (not new or progressive) | 16.53 | 37.0 | N/A | 98.6  |     | 0   | 3+ PSA           |
|     | 30/10/14 | No                           | 19.88 | 37.2 | Yes | 99    |     | 0   | 3+ PSA           |
|     | 31/10/14 | No                           | 23.47 | 36.8 | Yes | 98.2  |     | 0   | 3+ PSA           |
|     | 01/11/14 | Yes (new)                    | 26.13 | 37.8 | Yes | 100   | VAP | 0   | 3+ PSA           |
|     | 02/11/14 | Yes                          | 20.91 | 37.3 | Yes | 99.2  | VAP | 0   | 3+ PSA           |
|     | 03/11/14 | No                           | 10.36 | 37.1 | N/A | 98.7  |     | N/A | N/A              |
| 107 | 28/10/14 | No                           | 6.91  | 38.0 | Yes | 100.4 |     | 3+  | 3+ ENTA          |

|     |          |                              |       |      |     |       |     |                  |
|-----|----------|------------------------------|-------|------|-----|-------|-----|------------------|
|     | 29/10/14 | No                           | 7.82  | 37.9 | No  | 100.3 | 4+  | 1+ ENTA          |
|     | 30/10/14 | No                           | 8.74  | 38.0 | Yes | 100.4 | 4+  | 2+ ENTA          |
|     | 31/10/14 | No                           | 7.71  | 38.0 | Yes | 100.4 | 1+  | 0                |
|     | 01/11/14 | Yes (new)                    | 8.26  | 38.6 | No  | 101.4 | 0   | 3+ SERM          |
|     | 02/11/14 | Yes                          | 9.66  | 38.4 | Yes | 101.2 | VAP | 2+ SERM          |
|     | 03/11/14 | Yes                          | 11.07 | 38.1 | No  | 100.5 | VAP | 3+ SERM; 2+ ENTA |
|     | 04/11/14 | No                           | 11.05 | 38.1 | Yes | 100.5 | 0   | 3+ SERM          |
|     | 05/11/14 | Yes (new)                    | 9.93  | 37.9 | Yes | 100.2 | 0   | 3+ SERM          |
|     | 06/11/14 | No                           | 9.4   | 37.9 | No  | 100.2 | 0   | 2+ SERM; 1+ ENTA |
|     | 07/11/14 | No                           | 12.85 | 38.1 | N/A | 100.5 | N/A | N/A              |
| 108 | 28/10/14 | No                           | 13.86 | 38.5 | Yes | 101.3 | 0   | 0                |
|     | 29/10/14 | No                           | N/A   | 37.6 | No  | 99.6  | 0   | 0                |
|     | 30/10/14 | No                           | 11.3  | 37.7 | Yes | 99.8  | 0   | 0                |
|     | 31/10/14 | No                           | 15.85 | 37.6 | Yes | 99.7  | 0   | 0                |
|     | 01/11/14 | No                           | 12.86 | 37.6 | No  | 99.6  | 0   | 0                |
|     | 02/11/14 | N/A                          | 8.94  | 37.4 | N/A | 99.3  | N/A | N/A              |
| 109 | 23/05/15 | Yes (not new or progressive) | 13.16 | 38.3 | No  | 100.9 | 1+  | 0                |
|     | 24/05/15 | Yes (not new or progressive) | 3.58  | 38.3 | No  | 101   | N/A | N/A              |
|     | 25/05/15 | Yes (not new or progressive) | 5.89  | 37.7 | N/A | 99.8  | N/A | N/A              |
|     | 26/05/15 | Yes (not new or progressive) | 5.63  | 39.1 | N/A | 102.3 | N/A | N/A              |
|     | 27/05/15 | Yes (not new or progressive) | 7.99  | 38.0 | No  | 100.4 | 1+  | 0                |
|     | 28/05/15 | Yes (not new or progressive) | 3.93  | 39.3 | N/A | 102.7 | N/A | N/A              |
|     | 29/05/15 | Yes (not new or progressive) | 4.83  | 38.2 | No  | 100.7 | 1+  | 0                |
|     | 30/05/15 | Yes (not new or progressive) | 4.86  | 37.6 | No  | 99.7  | 2+  | 3+ XMAL          |
|     | 31/05/15 | Yes (not new or progressive) | N/A   | N/A  | N/A | N/A   | N/A | N/A              |
| 110 | 24/05/15 | No                           | 14.16 | 37.5 | N/A | 99.5  | N/A | N/A              |
|     | 25/05/15 | Yes (new)                    | 8.51  | 36.9 | Yes | 98.4  | 0   | 0                |
|     | 26/05/15 | Yes (progressive)            | 8.15  | 37.6 | Yes | 99.6  | 0   | 0                |
|     | 27/05/15 | Yes                          | 11.54 | 37.3 | N/A | 99.1  | N/A | N/A              |
|     | 28/05/15 | Yes                          | 9.48  | 37.7 | No  | 99.9  | 0   | 0                |
|     | 29/05/15 | No                           | 10.21 | 37.6 | Yes | 99.7  | 0   | 0                |
|     | 30/05/15 | No                           | 6.34  | 37.6 | No  | 99.6  | 0   | 0                |
|     | 31/05/15 | No                           | 6.94  | 37.3 | Yes | 99.1  | 0   | 0                |
|     | 01/06/15 | No                           | 7.49  | 37.2 | Yes | 99    | 0   | 2+ ENTC          |
|     | 02/06/15 | No                           | 8.56  | 36.9 | N/A | 98.4  | N/A | N/A              |
| 111 | 01/11/14 | Yes (not new or progressive) | 14.97 | 37.7 | No  | 99.8  | 0   | 0                |
|     | 02/11/14 | Yes (not new or progressive) | 11.41 | 38.1 | No  | 100.5 | 0   | 0                |
|     | 03/11/14 | No                           | 12.67 | 38.1 | No  | 100.5 | 0   | 0                |
|     | 04/11/14 | Yes (new)                    | 14.39 | 38.3 | Yes | 101   | VAP | 0                |
|     | 05/11/14 | Yes                          | 14.62 | 37.5 | No  | 99.5  | 0   | 0                |
|     | 06/11/14 | Yes                          | 12.8  | 37.1 | N/A | 98.7  | N/A | N/A              |
| 112 | 01/11/14 | Yes (not new or progressive) | 20.54 | 36.9 | No  | 98.5  | N/A | N/A              |
|     | 02/11/14 | Yes (progressive)            | 18.6  | 37.7 | Yes | 99.8  | 0   | 0                |
|     | 03/11/14 | No                           | 18.83 | 37.4 | Yes | 99.3  | 1+  | 0                |
|     | 04/11/14 | Yes (new)                    | 8.6   | 37.5 | Yes | 99.5  | 0   | 0                |
|     | 05/11/14 | No                           | 11.82 | 37.2 | N/A | 98.9  | N/A | N/A              |
| 113 | 25/05/15 | Yes (not new or progressive) | 14.63 | 38.1 | No  | 100.6 | 0   | 0                |
|     | 26/05/15 | No                           | 12.06 | 38.1 | No  | 100.6 | 0   | 0                |
|     | 27/05/15 | Yes (new)                    | 14.92 | 37.3 | No  | 99.1  | N/A | N/A              |
|     | 28/05/15 | Yes                          | 7.58  | 38.1 | No  | 100.5 | 0   | 0                |
|     | 29/05/15 | Yes                          | 6.78  | 38.9 | No  | 102   | 0   | 0                |
|     | 30/05/15 | Yes                          | 7.47  | 39.1 | No  | 102.4 | 0   | 0                |
|     | 31/05/15 | No                           | 9.97  | 37.8 | No  | 100.1 | 0   | 0                |
|     | 01/06/15 | N/A                          | 10.05 | 38.2 | No  | 100.7 | 0   | 0                |
|     | 02/06/15 | Yes (new)                    | 9.1   | 37.9 | Yes | 100.2 | 0   | 0                |
|     | 03/06/15 | No                           | 10.64 | 37.4 | N/A | 99.3  | N/A | N/A              |
|     | 04/06/15 | No                           | 12.16 | 36.7 | N/A | 98    | N/A | N/A              |
| 114 | 04/11/14 | No                           | 13.26 | 38.1 | Yes | 100.6 | 0   | 0                |
|     | 05/11/14 | No                           | 14.17 | 38.6 | Yes | 0     | 0   | 0                |
|     | 06/11/14 | No                           | 12.09 | 38.6 | No  | 0     | 0   | 0                |
|     | 07/11/14 | N/A                          | N/A   | 37.8 | Yes | 0     | 0   | 0                |
|     | 08/11/14 | N/A                          | N/A   | N/A  | N/A | N/A   | N/A | N/A              |
| 115 | 06/11/14 | No                           | 26.17 | 37.9 | Yes | 100.2 | N/A | N/A              |
|     | 07/11/14 | No                           | 14.41 | 37.2 | Yes | 98.9  | 0   | 0                |
| 116 | 08/11/14 | N/A                          | N/A   | N/A  | N/A | N/A   | N/A | N/A              |
|     | 06/11/14 | No                           | 11.22 | 33.8 | N/A | N/A   | N/A | N/A              |
|     | 07/11/14 | No                           | 9.38  | 38.1 | Yes | 100.6 | 0   | 0                |
|     | 08/11/14 | No                           | 9.72  | 38.0 | No  | 100.6 | 1+  | 0                |
|     | 09/11/14 | No                           | 12.66 | 37.9 | No  | 0     | 0   | 0                |
|     | 10/11/14 | No                           | 13.84 | 37.4 | No  | 0     | 0   | 0                |
|     | 11/11/14 | Yes (new)                    | 19.53 | 38.6 | Yes | VAP   | 0   | 0                |
|     | 12/11/14 | Yes                          | 15.09 | 37.9 | N/A | N/A   | N/A | N/A              |
|     | 13/11/14 | Yes                          | 17.37 | 37.6 | No  | 99.7  | 0   | 0                |
|     | 14/11/14 | No                           | 25.47 | 38.3 | Yes | 0     | 0   | 2+ ACHX          |
|     | 15/11/14 | Yes (new)                    | 37.28 | 38.2 | Yes | VAP   | N/A | N/A              |
|     | 16/11/14 | Yes                          | 34.95 | 36.7 | Yes | VAP   | 0   | 3+ ACHX          |
|     | 17/11/14 | Yes                          | 28.84 | 36.7 | Yes | 98    | VAP | 4+ ACHX          |
|     | 18/11/14 | No                           | 23.49 | 36.9 | Yes | 98.4  | 0   | 4+ ACHX          |
|     | 19/11/14 | N/A                          | N/A   | N/A  | N/A | N/A   | N/A | N/A              |
| 117 | 09/11/14 | Yes (not new or progressive) | 18.72 | 37.1 | Yes | 98.8  | 0   | 0                |
|     | 10/11/14 | Yes (progressive)            | 14.05 | 38.4 | Yes | 101.1 | 0   | 0                |
|     | 11/11/14 | N/A                          | 10.67 | 36.9 | N/A | 98.4  | N/A | N/A              |
| 118 | 10/11/14 | No                           | 19.66 | 36.9 | Yes | 98.5  | 0   | 3+ KP; 4+ DIPS   |
|     | 11/11/14 | No                           | 13.02 | 36.7 | Yes | 98    | 0   | 3+ KP; 3+ DIPS   |
|     | 12/11/14 | No                           | 16.08 | 36.8 | No  | 98.2  | 0   | 4+ KP; 4+ DIPS   |
|     | 13/11/14 | No                           | 14.24 | 37.6 | Yes | 99.7  | 0   | 3+ KP; 2+ DIPS   |
|     | 14/11/14 | No                           | 12.14 | 37.6 | Yes | 0     | 0   | 3+ KP            |
|     | 15/11/14 | Yes (new)                    | 13.4  | 38.0 | Yes | 100.4 | VAP | 4+ KP            |
| 119 | 27/05/15 | No                           | 10.42 | 37.5 | Yes | 99.5  | 0   | 0                |
|     | 28/05/15 | Yes (new)                    | 7.93  | 37.3 | N/A | 99.2  | N/A | N/A              |
| 120 | 12/11/14 | No                           | 14.53 | 38.0 | N/A | 100.4 | N/A | N/A              |
|     | 13/11/14 | No                           | 10.7  | 37.4 | N/A | 99.4  | 0   | 0                |
|     | 14/11/14 | No                           | 8.62  | 36.8 | N/A | 98.3  | N/A | N/A              |
| 121 | 12/11/14 | Yes (not new or progressive) | 12.54 | 37.7 | No  | 99.9  | 0   | 0                |
|     | 13/11/14 | Yes (not new or progressive) | 10.72 | 38.1 | No  | 100.5 | 0   | 0                |
|     | 14/11/14 | Yes (not new or progressive) | 17.42 | 38.2 | No  | 100.8 | 0   | 3+ SPNE          |
|     | 15/11/14 | Yes (not new or progressive) | 13.8  | 39.1 | No  | 102.3 | 0   | 3+ SPNE          |
|     | 16/11/14 | Yes (not new or progressive) | 13.93 | 38.8 | No  | 101.8 | 0   | 0                |
|     | 17/11/14 | Yes (progressive)            | 16.61 | 38.1 | No  | 100.6 | VAP | 0                |
|     | 18/11/14 | Yes                          | 13.07 | 39.2 | No  | 102.6 | VAP | 0                |
|     | 19/11/14 | Yes                          | 13.39 | 39.2 | Yes | 102.6 | VAP | 1+ DIPS          |
|     | 20/11/14 | No                           | 13.77 | 38.4 | No  | 101.2 | 0   | 0                |
|     | 21/11/14 | No                           | 16.07 | 38.1 | N/A | 100.6 | N/A | N/A              |
|     | 22/11/14 | No                           | 20.24 | 37.9 | N/A | 100.2 | N/A | N/A              |
| 122 | 27/05/15 | Yes (not new or progressive) | 27.24 | 37.6 | No  | 99.7  | 0   | 0                |
|     | 28/05/15 | N/A                          | 16.22 | 37.3 | N/A | 99.2  | N/A | N/A              |
| 123 | 13/11/14 | No                           | 53.14 | 38.6 | No  | 101.5 | 0   | 3+ KP; 3+ PSA    |
|     | 14/11/14 | Yes (new)                    | 42.09 | 37.4 | Yes | 0     | 3+  | 3+ PSA           |
|     | 15/11/14 | Yes                          | 19.62 | 37.0 | No  | 98.6  | 0   | 2+ KP; 2+ PSA    |
|     | 16/11/14 | Yes                          | 13.87 | 37.8 | No  | 100   | 0   | 2+ KP; 2+ PSA    |
|     | 17/11/14 | Yes                          | 16.31 | 37.8 | No  | 100   | 0   | 2+ KP; 2+ PSA    |
|     | 18/11/14 | Yes                          | 17.49 | 39.2 | Yes | 102.5 | 3+  | 3+ PSA; 3+ SERM  |
|     | 19/11/14 | Yes                          | 15.01 | 37.8 | Yes | 100.1 | 1+  | 2+ DIPS; 2+ PSA  |



|     |          |                              |       |      |     |       |               |                      |       |
|-----|----------|------------------------------|-------|------|-----|-------|---------------|----------------------|-------|
|     | 20/11/14 | Yes                          | 14.01 | 37.4 | Yes | 99.3  | 0             | 2+ PSA; 2+ SERM      |       |
|     | 21/11/14 | Yes                          | 13.8  | 37.2 | No  | 98.9  | 0             | 3+ PSA; 2+ SERM      |       |
|     | 22/11/14 | Yes                          | 12.35 | 37.1 | Yes | 98.7  | 0             | 3+ PSA; 2+ SERM      |       |
| 124 | 13/11/14 | No                           | 14.58 | 37.2 | Yes | 98.9  | 0             | 4+ KOX               |       |
|     | 14/11/14 | No                           | 9.88  | 38.2 | Yes | 100.7 | 0             | 3+ KOX               |       |
|     | 15/11/14 | Yes (new)                    | 9.01  | 38.8 | Yes | 101.9 | VAP           | 3+ KOX               |       |
|     | 16/11/14 | Yes                          | 10.47 | 39.0 | Yes | 102.2 | VAP           | 2+ KOX; 3+ MOST-MORX |       |
|     | 17/11/14 | Yes                          | 12.61 | 38.6 | Yes | 101.5 | VAP           | 2+ KOX; 1+ MORX      |       |
|     | 18/11/14 | Yes                          | 12.59 | 38.9 | Yes | 102   | VAP           | 1+ KOX               |       |
|     | 19/11/14 | Yes                          | 10.12 | 38.3 | No  | 101   |               | 1+ KOX               |       |
|     | 20/11/14 | Yes                          | 10.95 | 39.3 | Yes | 102.8 | VAP           | 2+ KOX               |       |
|     | 21/11/14 | No                           | 10.65 | 38.6 | Yes | 101.4 |               | 2+ KOX               |       |
|     | 22/11/14 | Yes (new)                    | 12.92 | 38.2 | No  | 100.8 | VAP           | 2+ KOX               |       |
|     | 23/11/14 | No                           | 15.25 | 38.2 | No  | 100.7 |               | 1+ KOX               |       |
|     | 24/11/14 | No                           | 15.63 | 37.7 | N/A | 99.9  | 0             | 2+ KOX               |       |
| 125 | 14/11/14 | Yes (not new or progressive) | 18.84 | 37.2 | Yes | 99    | 3+            | 0                    |       |
|     | 15/11/14 | Yes (not new or progressive) | 23.38 | 37.7 | Yes | 99.9  | 3+            | 0                    | SAUR  |
|     | 16/11/14 | Yes (not new or progressive) | 11.61 | 37.4 | Yes | 99.3  | 3+            | 0                    |       |
|     | 17/11/14 | Yes (progressive)            | 8.33  | 36.9 | Yes | 98.5  | 2+            | 0                    |       |
|     | 18/11/14 | No                           | 7.33  | 37.1 | Yes | 98.8  | 3+            | 0                    |       |
|     | 19/11/14 | Yes (new)                    | 9.33  | 37.6 | Yes | 99.6  | 2+            | 0                    |       |
|     | 20/11/14 | No                           | 10.47 | 37.3 | Yes | 99.1  | 2+            | 0                    |       |
|     | 21/11/14 | Yes (new)                    | 7.16  | 37.3 | Yes | 99.2  | 2+ (MORP2)    | 0                    |       |
|     | 22/11/14 | Yes                          | 6.32  | 37.0 | Yes | 98.6  | 2+; 2+ (OMOR) | 0                    |       |
|     | 23/11/14 | Yes                          | 7.42  | 37.1 | No  | 98.8  | 2+; 2+ (OMOR) | 0                    |       |
|     | 24/11/14 | Yes                          | 6.02  | 36.8 | Yes | 98.2  | 2+ (MORP2)    | 0                    |       |
| 126 | 14/11/14 | No                           | 15.76 | 38.3 | Yes | 101   | 0             | 0                    | Yeast |
|     | 15/11/14 | Yes (new)                    | 15.38 | 37.3 | Yes | 99.1  | 0             | 0                    |       |
|     | 16/11/14 | Yes                          | 16.17 | 37.6 | No  | 99.6  | 0             | 0                    |       |
|     | 17/11/14 | Yes                          | 18.51 | 36.4 | No  | 97.6  | 0             | 0                    |       |
|     | 18/11/14 | Yes                          | 25.73 | 36.8 | Yes | 98.3  | N/A           | N/A                  |       |
|     | 19/11/14 | N/A                          | N/A   | N/A  | N/A | N/A   | N/A           | N/A                  |       |
| 127 | 15/11/14 | Yes (not new or progressive) | 19.32 | 38.3 | Yes | 101   | 0             | 3+ ENTC              |       |
|     | 16/11/14 | Yes (not new or progressive) | 14.01 | 37.5 | Yes | 99.5  | 0             | 3+ ENTC              |       |
| 128 | 16/11/14 | Yes (not new or progressive) | 2.92  | 34.4 | N/A |       | N/A           | N/A                  |       |
|     | 17/11/14 | No                           | 5.42  | 37.9 | No  |       | 0             | 0                    |       |
|     | 18/11/14 | Yes (new)                    | 4.63  | 36.9 | Yes |       | 0             | 0                    |       |
|     | 19/11/14 | Yes                          | 7.74  | 37.8 | Yes |       | 0             | 0                    |       |
|     | 20/11/14 | Yes                          | 9.79  | 38.3 | Yes | VAP   | 0             | 0                    |       |
|     | 21/11/14 | No                           | 10.78 | 39.2 | N/A |       | N/A           | N/A                  |       |
| 129 | 17/11/14 | No                           | 7.35  | 37.1 | No  | 98.8  | 0             | 0                    |       |
|     | 18/11/14 | Yes (new)                    | 10.79 | 37.0 | Yes | 98.6  | 0             | 4+ HFLU              |       |
|     | 19/11/14 | Yes                          | 11.3  | 37.1 | Yes | 98.8  | 0             | 4+ HFLU              |       |
|     | 20/11/14 | Yes                          | 11.42 | 37.3 | N/A | 99.1  | N/A           | N/A                  |       |
|     | 21/11/14 | No                           | 7.54  | 37.2 | No  | 98.9  | 0             | 0                    |       |
|     | 22/11/14 | Yes (new)                    | 9.9   | 37.1 | Yes | 98.7  | 0             | 0                    |       |
|     | 23/11/14 | Yes                          | 11.01 | 36.9 | No  | 98.5  | 0             | 0                    |       |
|     | 24/11/14 | No                           | 7.16  | 37.0 | No  | 98.6  | 0             | 0                    |       |
|     | 25/11/14 | Yes (new)                    | 8.64  | 36.9 | No  | 98.5  | 0             | 2+ HFLU              |       |
|     | 26/11/14 | Yes                          | 12.15 | 37.0 | Yes | 98.6  | VAP           | 3+ HFLU              |       |
|     | 27/11/14 | Yes                          | 15.51 | 37.1 | N/A | 98.7  | N/A           | N/A                  |       |
| 130 | 18/11/14 | Yes (not new or progressive) | 13.77 | 36.9 | Yes | 98.5  | 0             | 0                    |       |
|     | 19/11/14 | Yes (progressive)            | 22.05 | 36.9 | Yes | 98.4  | VAP           | 0                    |       |
|     | 20/11/14 | Yes                          | 17.67 | 37.3 | No  | 99.2  | 0             | 0                    |       |
|     | 21/11/14 | Yes (progressive)            | 18.43 | 37.4 | No  | 99.3  | 0             | 0                    |       |
|     | 22/11/14 | Yes                          | 24.6  | 38.1 | Yes | 100.5 | VAP           | 0                    |       |
|     | 23/11/14 | No                           | 25.52 | 36.9 | Yes | 98.4  | 0             | 0                    |       |
|     | 24/11/14 | No                           | 22.81 | 37.2 | No  | 99    | 0             | 0                    |       |
|     | 25/11/14 | Yes (new)                    | 21.52 | 38.6 | No  | 101.4 | VAP           | 0                    |       |
|     | 26/11/14 | Yes                          | 18.89 | 37.9 | Yes | 100.2 | VAP           | 0                    |       |
|     | 27/11/14 | No                           | 20.4  | 37.5 | N/A | 99.5  | N/A           | N/A                  |       |
| 131 | 20/11/14 | Yes (not new or progressive) | 16.11 | 36.9 | No  | 98.5  | 0             | 0                    |       |
|     | 21/11/14 | No                           | 23.52 | 37.3 | Yes | 99.2  | 0             | 0                    |       |
|     | 22/11/14 | No                           | 32.36 | 37.0 | No  | 98.6  | 0             | 0                    |       |
|     | 23/11/14 | No                           | 36.92 | 37.3 | Yes | 99.2  | 0             | 0                    |       |
|     | 24/11/14 | No                           | 45.61 | 37.4 | Yes | 99.3  | 0             | 0                    |       |
|     | 25/11/14 | Yes (new)                    | 40.32 | 37.4 | Yes | 99.3  | VAP           | 0                    |       |
|     | 26/11/14 | No                           | 31.73 | 37.2 | N/A | 98.9  | N/A           | N/A                  |       |
| 132 | 22/11/14 | Yes (not new or progressive) | 6.08  | 38.3 | No  |       | 0             | 0                    |       |
|     | 23/11/14 | Yes (not new or progressive) | 10.56 | 37.6 | No  |       | 0             | 0                    |       |
|     | 24/11/14 | Yes (not new or progressive) | 9.12  | 37.1 | Yes | 98.7  | 0             | 0                    |       |
|     | 25/11/14 | Yes (not new or progressive) | 8.11  | 36.7 | No  | 98    | 0             | 0                    |       |
|     | 26/11/14 | Yes (not new or progressive) | 10.65 | 37.7 | N/A | 99.9  | N/A           | N/A                  |       |
| 133 | 24/11/14 | Yes (not new or progressive) | 8.06  | 38.9 | N/A |       | N/A           | N/A                  |       |
|     | 25/11/14 | N/A                          | 7.1   | 38.7 | N/A | 101.7 | N/A           | N/A                  |       |
|     | 26/11/14 | Yes (not new or progressive) | 7.65  | 38.7 | Yes | 101.7 | N/A           | N/A                  |       |
|     | 27/11/14 | Yes (not new or progressive) | 5.38  | 38.7 | N/A |       | N/A           | N/A                  |       |
|     | 28/11/14 | No                           | 6.1   | 38.5 | N/A |       | N/A           | N/A                  |       |
|     | 29/11/14 | Yes (new)                    | 7.15  | 38.8 | Yes | 101.9 | VAP           | 1+                   | 0     |
|     | 30/11/14 | No                           | 9.15  | 38.2 | Yes |       |               | 2+                   | 0     |
|     | 01/12/14 | No                           | 9.64  | 37.4 | N/A | 99.4  | N/A           | N/A                  |       |
|     | 02/12/14 | No                           | 10.94 | 37.4 | No  | 99.3  | 0             | 0                    |       |
|     | 03/12/14 | No                           | 13.7  | 37.1 | N/A | 98.7  | N/A           | N/A                  |       |
| 134 | 28/05/15 | No                           | 12.48 | 37.5 | No  | 99.5  | 2+            | 0                    |       |
|     | 29/05/15 | No                           | 10.19 | 37.0 | N/A | 98.6  | N/A           | N/A                  |       |
|     | 30/05/15 | Yes (new)                    | 7.42  | 37.2 | Yes | 99    | 4+            | 0                    |       |
|     | 31/05/15 | Yes                          | 8.83  | 37.6 | Yes | 99.7  | 4+            | 0                    |       |
|     | 01/06/15 | No                           | 13.15 | 38.0 | Yes | 100.4 | 4+            | 0                    |       |
|     | 02/06/15 | Yes (new)                    | 15.3  | 37.3 | Yes | 99.1  | VAP           | 4+                   | 0     |
|     | 03/06/15 | No                           | 11.59 | 37.8 | Yes | 100.1 | 3+            | 0                    |       |
|     | 04/06/15 | No                           | 18.61 | 37.4 | Yes | 99.3  | 2+            | 0                    |       |
|     | 05/06/15 | Yes (new)                    | 19.11 | 37.4 | Yes | 99.3  | VAP           | 3+                   | 0     |
|     | 06/06/15 | Yes                          | 21.67 | 37.4 | Yes | 99.4  | VAP           | 2+                   | 0     |
|     | 07/06/15 | Yes                          | 22.48 | 37.2 | Yes | 98.9  | VAP           | 2+                   | 0     |
|     | 08/06/15 | N/A                          | 25.26 | 37.1 | Yes | 98.7  | 1+            | 0                    |       |
|     | 09/06/15 | No                           | 25.92 | 36.9 | No  | 98.5  | N/A           | N/A                  |       |
|     | 10/06/15 | No                           | 26.86 | 37.2 | Yes | 99    | 1+            | 0                    |       |
|     | 11/06/15 | No                           | 19.69 | 36.9 | Yes | 98.5  | 0             | 0                    |       |
|     | 12/06/15 | No                           | 18.51 | 37.6 | No  | 99.6  | 0             | 0                    |       |
|     | 13/06/15 | No                           | 17.71 | 37.1 | Yes | 98.8  | 0             | 0                    |       |
|     | 14/06/15 | N/A                          | N/A   | N/A  | N/A |       | N/A           | N/A                  |       |
| 135 | 28/05/15 | N/A                          | 15.84 | 37.3 | Yes | 99.1  | 2+            | 0                    |       |
|     | 29/05/15 | No                           | 10.04 | 37.1 | N/A | 98.7  | N/A           | N/A                  |       |
| 136 | 30/05/15 | N/A                          | 9.02  | 37.1 | Yes | 98.8  | 3+            | 0                    |       |
|     | 31/05/15 | No                           | 7.87  | 36.8 | N/A | 98.2  | N/A           | N/A                  |       |
| 137 | 26/11/14 | Yes (not new or progressive) | 11.93 | 37.3 | No  | 99.1  | N/A           | N/A                  |       |
|     | 27/11/14 | No                           | 10.1  | 38.4 | N/A | 101.1 | N/A           | N/A                  |       |
|     | 28/11/14 | No                           | 10    | 38.1 | Yes | 100.5 | 0             | 0                    |       |
|     | 29/11/14 | No                           | 9.19  | 37.7 | Yes | 99.9  | 0             | 0                    |       |
|     | 30/11/14 | No                           | 7.27  | 36.8 | Yes | 98.3  | 1+            | 0                    |       |
|     | 01/12/14 | N/A                          | N/A   | 36.6 | N/A | 97.9  | N/A           | N/A                  |       |
| 138 | 28/11/14 | No                           | 5.77  | 37.8 | Yes |       | 1+            | 0                    |       |

|     |          |                              |       |      |     |       |     |         |        |
|-----|----------|------------------------------|-------|------|-----|-------|-----|---------|--------|
|     | 29/11/14 | No                           | 5     | 37.7 | Yes |       | 0   | 0       |        |
|     | 30/11/14 | N/A                          | 4.33  | N/A  | N/A |       | N/A | N/A     |        |
| 139 | 18/06/15 | No                           | 16.31 | 38.1 | No  | 100.5 | 0   | 0       |        |
|     | 19/06/15 | No                           | 16.01 | 38.6 | Yes | 101.5 | 0   | 0       |        |
|     | 20/06/15 | No                           | 15.59 | 38.4 | No  | 101.1 | 0   | 0       |        |
|     | 21/06/15 | No                           | 15.45 | 38.0 | Yes | 100.4 | 0   | 0       |        |
|     | 22/06/15 | No                           | 17.36 | 38.2 | No  | 100.7 | 0   | 0       |        |
|     | 23/06/15 | No                           | 17.2  | 38.7 | Yes | 101.6 | 0   | 0       |        |
|     | 24/06/15 | No                           | 16.33 | 38.1 | N/A | 100.6 | N/A | N/A     |        |
|     | 25/06/15 | N/A                          | N/A   | N/A  | N/A |       | N/A | N/A     |        |
| 140 | 28/11/14 | Yes (not new or progressive) | 20.26 | 36.9 | Yes | 98.4  | 3+  | 0       |        |
|     | 29/11/14 | Yes (not new or progressive) | 21.85 | 37.0 | Yes | 98.6  | 3+  | 0       |        |
|     | 30/11/14 | Yes (not new or progressive) | 21.38 | 37.1 | Yes | 98.8  | 2+  | 0       |        |
|     | 01/12/14 | N/A                          | 23.35 | 37.5 | Yes | 99.5  | 3+  | 0       |        |
|     | 02/12/14 | Yes (not new or progressive) | 24.32 | 37.9 | No  | 100.3 | 3+  | 0       |        |
|     | 03/12/14 | Yes (not new or progressive) | 23.18 | 37.4 | Yes | 99.3  | 2+  | 0       |        |
|     | 04/12/14 | Yes (not new or progressive) | 19.48 | 37.0 | No  | 98.6  | 3+  | 0       |        |
|     | 05/12/14 | Yes (not new or progressive) | 25.83 | 37.8 | Yes | 100.1 | 3+  | 0       |        |
|     | 06/12/14 | Yes (not new or progressive) | 19.92 | 38.1 | Yes | 100.5 | 4+  | 0       |        |
|     | 07/12/14 | Yes (not new or progressive) | 20.54 | 38.4 | Yes | 101.1 | 3+  | 0       |        |
|     | 08/12/14 | Yes (not new or progressive) | 19.96 | 37.3 | Yes | 99.2  | 2+  | 0       |        |
|     | 09/12/14 | Yes (not new or progressive) | 25.79 | 38.1 | Yes | 100.6 | 2+  | 0       |        |
|     | 10/12/14 | N/A                          | N/A   | 37.4 | Yes | 99.4  | 3+  | 0       |        |
|     | 11/12/14 | N/A                          | N/A   | 37.1 | Yes | 98.8  | 2+  | 0       |        |
| 141 | 28/11/14 | Yes (not new or progressive) | 11.69 | 37.3 | Yes | 99.2  | 3+  | 0       |        |
|     | 29/11/14 | Yes (not new or progressive) | 12.85 | 36.5 | Yes | 97.7  | 2+  | 0       |        |
|     | 30/11/14 | Yes (not new or progressive) | 11.68 | 37.2 | Yes | 98.9  | 1+  | 2+ DIPS |        |
|     | 01/12/14 | Yes (not new or progressive) | 11.74 | 37.2 | Yes | 98.9  | 1+  | 0       |        |
|     | 02/12/14 | Yes (not new or progressive) | 9.41  | 37.0 | No  | 98.6  | 2+  | 0       |        |
|     | 03/12/14 | No                           | 10.69 | 37.7 | Yes | 99.9  | 0   | 0       |        |
|     | 04/12/14 | No                           | 8.8   | 37.9 | Yes | 100.2 | 0   | 0       |        |
|     | 05/12/14 | N/A                          | N/A   | N/A  | N/A |       | N/A | N/A     |        |
| 142 | 29/11/14 | Yes (not new or progressive) | 8.8   | 37.1 | Yes | 98.8  | 0   | 2+ XMAL |        |
|     | 30/11/14 | Yes (not new or progressive) | 6.55  | 37.1 | Yes | 98.7  | 0   | 3+ XMAL |        |
|     | 01/12/14 | N/A                          | 5.6   | N/A  | N/A |       | N/A | N/A     |        |
| 143 | 29/11/14 | No                           | 4.86  | 37.3 | No  | 99.2  | 0   | 0       |        |
|     | 30/11/14 | No                           | 4.15  | 37.4 | Yes | 99.4  | 0   | 0       |        |
|     | 01/12/14 | No                           | 5.69  | 37.0 | No  | 98.6  | 0   | 0       |        |
|     | 02/12/14 | No                           | 5.31  | 36.9 | Yes | 98.5  | 0   | 0       |        |
|     | 03/12/14 | No                           | 4.16  | 38.1 | Yes | 100.5 | 0   | 0       |        |
|     | 04/12/14 | No                           | 4.62  | 37.7 | Yes | 99.9  | 0   | 0       |        |
|     | 05/12/14 | No                           | 6.68  | 37.3 | N/A | 99.2  | N/A | N/A     |        |
| 144 | 30/11/14 | No                           | 6.7   | 37.8 | No  | 100   | 1+  | 0       |        |
|     | 01/12/14 | N/A                          | 5.28  | 37.1 | N/A | 98.7  | N/A | N/A     |        |
|     | 02/12/14 | N/A                          | 10.4  | 37.3 | N/A | 99.2  | N/A | N/A     |        |
| 145 | 30/11/14 | No                           | 16.41 | 28.8 | No  |       | 2+  | N/A     |        |
|     | 01/12/14 | No                           | 13.98 | 32.5 | N/A |       | N/A | N/A     |        |
|     | 02/12/14 | No                           | 23.33 | 36.1 | No  |       | 1+  | 0       |        |
|     | 03/12/14 | No                           | 30.87 | 38.3 | Yes |       | N/A | N/A     |        |
|     | 04/12/14 | Yes (new)                    | 32.24 | 36.1 | Yes |       | 0   | 0       |        |
|     | 05/12/14 | Yes                          | 21.84 | 35.7 | Yes | VAP   | 0   | 0       |        |
|     | 06/12/14 | No                           | 19.94 | 35.3 | Yes | VAP   | 0   | 0       |        |
|     | 07/12/14 | No                           | 21.3  | 36.9 | Yes |       | 0   | 0       |        |
|     | 08/12/14 | Yes (new)                    | 29.77 | 37.7 | Yes | 99.8  | VAP | 0       |        |
|     | 09/12/14 | No                           | 27.89 | 37.4 | N/A | 99.4  | N/A | N/A     |        |
|     | 10/12/14 | No                           | 22.67 | 37.1 | Yes | 98.8  | 0   | 0       |        |
|     | 11/12/14 | Yes (new)                    | 16.2  | 38.1 | Yes | 100.5 | VAP | 0       |        |
|     | 12/12/14 | No                           | 15.91 | 38.1 | N/A | 100.5 | N/A | N/A     |        |
|     | 13/12/14 | No                           | 20.23 | 38.4 | N/A | 101.2 | N/A | N/A     |        |
|     | 14/12/14 | N/A                          | 19.27 | 38.6 | Yes | 101.5 | 0   | 0       |        |
|     | 15/12/14 | No                           | 19.38 | 38.6 | No  | 101.4 | 0   | 4+ KP   |        |
|     | 16/12/14 | No                           | 18.54 | 37.8 | Yes | 100   | 0   | 4+ KP   |        |
|     | 17/12/14 | No                           | 18.12 | 37.8 | Yes | 100.1 | 0   | 3+ KP   |        |
|     | 18/12/14 | No                           | 17.64 | 38.2 | Yes | 100.8 | 0   | 3+ KP   |        |
|     | 19/12/14 | No                           | 22.39 | 38.4 | Yes | 101.2 | 0   | 3+ KP   |        |
|     | 20/12/14 | N/A                          | N/A   | N/A  | N/A |       | N/A | N/A     |        |
| 146 | 30/11/14 | No                           | 12.87 | 37.7 | N/A | 99.8  | N/A | N/A     |        |
|     | 01/12/14 | Yes (new)                    | 10.21 | 37.9 | Yes | 100.3 | 3+  | 0       |        |
|     | 02/12/14 | No                           | 12.48 | 38.1 | Yes | 100.6 | 4+  | 0       |        |
|     | 03/12/14 | No                           | 11.28 | 38.2 | Yes | 100.7 | 4+  | 0       |        |
|     | 04/12/14 | No                           | 9.29  | 38.1 | N/A | 100.6 | N/A | N/A     |        |
|     | 05/12/14 | No                           | 11.9  | 39.3 | Yes | 102.7 | 4+  | 0       |        |
|     | 06/12/14 | No                           | 10.48 | 37.9 | Yes | 100.2 | 3+  | 0       |        |
|     | 07/12/14 | Yes (new)                    | 10.19 | 38.2 | Yes | 100.7 | VAP | 4+      | 2+ KP  |
|     | 08/12/14 | Yes                          | N/A   | 37.7 | Yes | 99.8  | 3+  | 0       |        |
|     | 09/12/14 | Yes                          | N/A   | 38.1 | Yes | 100.5 | VAP | 3+      | 0      |
|     | 10/12/14 | N/A                          | 12.96 | 38.2 | Yes | 100.8 | 3+  | 0       |        |
|     | 11/12/14 | Yes                          | 14.26 | 37.9 | Yes | 100.2 | VAP | 4+      | 0      |
|     | 12/12/14 | N/A                          | N/A   | 37.7 | Yes | 99.9  | 3+  | 0       |        |
| 147 | 30/11/14 | No                           | 10.35 | 36.9 | N/A | 98.5  | N/A | N/A     |        |
|     | 01/12/14 | No                           | 8.86  | 37.0 | No  | 98.6  | 0   | 0       |        |
|     | 02/12/14 | No                           | 7.48  | 37.6 | Yes | 99.6  | 0   | 0       |        |
|     | 03/12/14 | No                           | 7.75  | 37.1 | N/A | 98.8  | N/A | N/A     |        |
| 148 | 01/12/14 | No                           | 4.94  | 37.5 | Yes | 99.5  | 0   | 0       |        |
|     | 02/12/14 | No                           | 4.49  | 37.7 | Yes | 99.9  | 0   | 0       |        |
|     | 03/12/14 | Yes (new)                    | 4.79  | 38.1 | Yes | 100.5 | VAP | 2+      | 4+ PSA |
|     | 04/12/14 | Yes                          | 6.29  | 36.9 | Yes | 98.5  | 0   | 4+ PSA  |        |
|     | 05/12/14 | Yes                          | 6.47  | 36.9 | Yes | 98.5  | 0   | 3+ PSA  |        |
|     | 06/12/14 | Yes                          | 5.34  | 36.6 | Yes | 97.9  | 0   | 4+ PSA  |        |
|     | 07/12/14 | Yes                          | 8.49  | 36.6 | Yes | 97.9  | 0   | 4+ PSA  |        |
|     | 08/12/14 | Yes                          | 10.02 | 37.2 | Yes | 99    | 0   | 3+ PSA  |        |
|     | 09/12/14 | Yes                          | 5.65  | 36.8 | No  | 98.2  | 0   | 4+ PSA  |        |
|     | 10/12/14 | Yes                          | 7.92  | 36.9 | Yes | 98.4  | 0   | 3+ PSA  |        |
|     | 11/12/14 | Yes                          | 7.97  | 37.3 | Yes | 99.1  | 0   | 4+ PSA  |        |
|     | 12/12/14 | No                           | 6.42  | 34.4 | N/A | 93.9  | N/A | N/A     |        |
| 149 | 05/12/14 | No                           | 12.68 | 37.6 | Yes | 99.7  | 0   | 0       |        |
|     | 06/12/14 | No                           | 13.12 | 37.8 | Yes | 100   | 0   | 0       |        |
|     | 07/12/14 | No                           | 12.13 | 37.5 | Yes | 99.5  | 0   | 0       |        |
|     | 08/12/14 | No                           | 12.55 | 37.8 | Yes | 100.1 | 0   | 0       |        |
|     | 09/12/14 | No                           | 9.05  | 37.3 | No  | 99.1  | 0   | 0       |        |
|     | 10/12/14 | Yes (new)                    | 10.55 | 37.7 | Yes | 99.8  | 0   | 0       |        |
|     | 11/12/14 | No                           | 11    | 37.2 | Yes | 99    | 0   | 0       |        |
|     | 12/12/14 | No                           | 12.45 | 37.5 | Yes | 99.5  | 0   | 0       |        |
|     | 13/12/14 | No                           | 14.15 | 37.7 | No  | 99.9  | 0   | 0       |        |
|     | 14/12/14 | No                           | 16.45 | 37.4 | N/A | 99.4  | N/A | N/A     |        |
| 150 | 03/12/14 | Yes (not new or progressive) | 7.43  | 37.1 | No  | 98.7  | 0   | 0       |        |
|     | 04/12/14 | Yes (not new or progressive) | 5.5   | 37.3 | No  | 99.2  | 0   | 0       |        |
|     | 05/12/14 | Yes (not new or progressive) | 4.27  | 37.4 | No  | 99.3  | 0   | 0       |        |
|     | 06/12/14 | Yes (not new or progressive) | 4.61  | 37.7 | Yes | 99.8  | 0   | 0       |        |
|     | 07/12/14 | Yes (not new or progressive) | 3.29  | 37.6 | No  | 99.6  | 0   | 0       |        |
|     | 08/12/14 | Yes (not new or progressive) | 3.01  | 37.0 | No  | 98.6  | 0   | 0       |        |
|     | 09/12/14 | Yes (not new or progressive) | 3.06  | 37.6 | Yes | 99.6  | 0   | 0       |        |
|     | 10/12/14 | No                           | 2.8   | 37.5 | No  | 99.5  | 0   | 0       |        |

|     |          |                              |       |      |     |       |     |                    |         |
|-----|----------|------------------------------|-------|------|-----|-------|-----|--------------------|---------|
|     | 11/12/14 | No                           | 3.1   | 37.9 | Yes | 100.2 | 0   | 0                  |         |
|     | 12/12/14 | Yes (new)                    | 3.67  | 37.9 | N/A | 100.3 | N/A | N/A                |         |
| 151 | 06/12/14 | Yes (not new or progressive) | 14.8  | 36.9 | N/A | 98.4  | N/A | N/A                |         |
|     | 07/12/14 | Yes (not new or progressive) | 12.41 | 37.3 | Yes | 99.2  | 3+  | 0                  |         |
|     | 08/12/14 | Yes (not new or progressive) | 8.69  | 36.9 | Yes | 98.5  | 2+  | 0                  |         |
|     | 09/12/14 | Yes (progressive)            | 3.85  | 36.8 | N/A | 98.2  | N/A | N/A                |         |
| 152 | 03/12/14 | No                           | 12.06 | 37.8 | N/A |       | N/A | N/A                |         |
|     | 04/12/14 | No                           | 9.1   | 38.3 | Yes |       | 2+  | 0                  |         |
|     | 05/12/14 | No                           | 8.32  | 38.0 | Yes |       | 1+  | 1+ BTSTB           |         |
|     | 06/12/14 | No                           | 8.33  | 37.6 | N/A |       | N/A | N/A                |         |
|     | 07/12/14 | Yes (new)                    | 8.49  | 38.0 | Yes |       | 0   | 2+ BTSTB           |         |
|     | 08/12/14 | Yes                          | 8.41  | 38.5 | Yes |       | N/A | N/A                |         |
|     | 09/12/14 | Yes                          | 10    | 38.3 | Yes |       | 0   | 0                  |         |
|     | 10/12/14 | Yes                          | 11.31 | 38.3 | N/A | 100.9 | VAP | N/A                |         |
| 153 | 07/12/14 | Yes (not new or progressive) | 7.81  | 37.3 | N/A | 99.1  | N/A | N/A                |         |
|     | 08/12/14 | Yes (not new or progressive) | 8.44  | 37.2 | Yes | 99    | 0   | 0                  |         |
|     | 09/12/14 | No                           | 7.96  | 37.0 | N/A | 98.6  | N/A | N/A                |         |
| 154 | 02/06/15 | No                           | 8.89  | 37.1 | N/A | 98.8  | N/A | N/A                |         |
|     | 03/06/15 | No                           | 10.15 | 37.0 | N/A | 98.6  | N/A | N/A                |         |
|     | 04/06/15 | No                           | 8.56  | 36.9 | N/A | 98.5  | N/A | N/A                |         |
| 155 | 07/12/14 | Yes (not new or progressive) | 4.71  | 38.7 | N/A | 101.7 | N/A | N/A                |         |
|     | 08/12/14 | Yes (not new or progressive) | 1.71  | 37.7 | No  | 99.9  | 0   | 0                  |         |
|     | 09/12/14 | Yes (not new or progressive) | 1.01  | 37.4 | No  | 99.3  | 0   | 0                  |         |
|     | 10/12/14 | Yes (progressive)            | 1.12  | 37.3 | No  | 99.1  | 0.1 | 0                  |         |
|     | 11/12/14 | No                           | 3.9   | 37.6 | No  | 99.6  | 0   | 0                  |         |
|     | 12/12/14 | Yes (new)                    | 10.1  | 38.4 | Yes | 101.2 | VAP | 0                  |         |
|     | 13/12/14 | Yes                          | 17.38 | 38.3 | No  | 101   | VAP | 0                  | 3+ XMAL |
|     | 14/12/14 | Yes                          | 26.5  | 38.4 | Yes | 101.1 | VAP | 0                  | 2+ XMAL |
|     | 15/12/14 | Yes                          | 36.9  | 38.4 | N/A | 101.1 | VAP | N/A                | XMAL    |
|     | 16/12/14 | Yes                          | 51.7  | N/A  | N/A |       | N/A | N/A                |         |
| 156 | 08/12/14 | Yes (not new or progressive) | 9.08  | 38.8 | N/A | 101.9 | N/A | N/A                |         |
|     | 09/12/14 | Yes (not new or progressive) | 16.58 | 37.4 | Yes | 99.4  | 0   | 0                  |         |
|     | 10/12/14 | Yes (not new or progressive) | 16.77 | 39.3 | Yes | 102.7 | 0   | 0                  |         |
|     | 11/12/14 | Yes (not new or progressive) | 18.5  | 39.4 | Yes | 103   | 0   | 0                  |         |
|     | 12/12/14 | Yes (not new or progressive) | 19.06 | 37.1 | N/A | 98.7  | N/A | N/A                |         |
|     | 13/12/14 | Yes (not new or progressive) | 12.8  | 39.9 | N/A | 103.9 | N/A | N/A                |         |
|     | 14/12/14 | Yes (not new or progressive) | N/A   | 39.3 | No  | 102.8 | 0   | 0                  |         |
| 157 | 10/12/14 | Yes (not new or progressive) | 20.13 | 37.8 | No  | 100   | N/A | N/A                |         |
|     | 11/12/14 | Yes (not new or progressive) | 24.4  | 37.3 | Yes | 99.1  | 0   | 0                  |         |
|     | 12/12/14 | Yes (not new or progressive) | 12.64 | 36.9 | N/A | 98.4  | N/A | N/A                |         |
| 158 | 03/06/15 | Yes (not new or progressive) | 17.67 | 37.3 | Yes | 99.1  | 0   | 0                  |         |
|     | 04/06/15 | Yes (not new or progressive) | 14.59 | 36.9 | N/A | 98.5  | N/A | N/A                |         |
|     | 05/06/15 | Yes (progressive)            | 11.42 | 37.3 | No  | 99.1  | 0   | 0                  |         |
|     | 06/06/15 | Yes                          | 11.94 | 37.0 | Yes | 98.6  | VAP | 0                  |         |
|     | 07/06/15 | Yes                          | 12.03 | 37.1 | Yes | 98.7  | VAP | 0                  |         |
|     | 08/06/15 | No                           | 12.29 | 37.2 | Yes | 98.9  | 0   | 0                  |         |
|     | 09/06/15 | No                           | 12.06 | 37.2 | No  | 99    | N/A | N/A                |         |
|     | 10/06/15 | No                           | 10.87 | 37.3 | No  | 99.2  | 0   | 0                  |         |
|     | 11/06/15 | Yes (new)                    | 8.89  | 37.0 | No  | 98.6  | 0   | 0                  |         |
|     | 12/06/15 | N/A                          | N/A   | 37.6 | N/A | 99.6  | N/A | N/A                |         |
|     | 13/06/15 | Yes                          | 10.97 | 37.2 | No  | 99    | 0   | 0                  |         |
|     | 14/06/15 | Yes                          | 10.82 | 37.3 | N/A | 99.2  | N/A | N/A                |         |
| 159 | 13/12/14 | Yes (not new or progressive) | 4.87  | 37.6 | N/A | 99.6  | N/A | N/A                |         |
|     | 14/12/14 | Yes (not new or progressive) | 4.72  | 37.6 | Yes | 99.6  | 0   | 2+ ENTA            |         |
|     | 15/12/14 | Yes (not new or progressive) | 5.11  | 38.5 | N/A | 101.3 | N/A | N/A                |         |
| 160 | 15/12/14 | No                           | 33.76 | 38.2 | No  | 100.7 | 0   | 0                  |         |
|     | 16/12/14 | No                           | 23.11 | 37.8 | N/A | 100   | N/A | N/A                |         |
|     | 17/12/14 | No                           | 24.38 | 37.1 | N/A | 98.7  | N/A | N/A                |         |
| 161 | 16/12/14 | Yes (not new or progressive) | 12.71 | 38.1 | N/A | 100.6 | N/A | N/A                |         |
|     | 17/12/14 | Yes (not new or progressive) | 9.52  | 37.6 | N/A | 99.6  | N/A | N/A                |         |
|     | 18/12/14 | Yes (not new or progressive) | 7.76  | 37.2 | Yes | 98.9  | 1+  | 0                  |         |
|     | 19/12/14 | Yes (not new or progressive) | 7.18  | 37.5 | No  | 99.5  | 1+  | 0                  |         |
|     | 20/12/14 | Yes (not new or progressive) | 7.17  | 37.8 | Yes | 100   | 3+  | 0                  |         |
|     | 21/12/14 | No                           | 12.44 | 32.9 | N/A | 91.3  | N/A | N/A                |         |
| 162 | 03/06/15 | Yes (not new or progressive) | 10.15 | 30.5 | Yes | 86.9  | 0   | 0                  |         |
|     | 04/06/15 | No                           | 6.53  | 31.8 | Yes | 89.2  | 0   | 0                  |         |
|     | 05/06/15 | Yes (new)                    | 9.09  | 38.6 | No  | 101.5 | 0   | 0                  |         |
|     | 06/06/15 | No                           | 10.08 | 37.8 | Yes | 100   | 2+  | 0                  |         |
|     | 07/06/15 | N/A                          | N/A   | 37.2 | Yes | 99    | 2+  | 0                  |         |
| 163 | 19/12/14 | No                           | 3.88  | 37.5 | No  | 99.5  | 0   | 0                  |         |
|     | 20/12/14 | Yes (new)                    | 4.57  | 37.1 | Yes | 98.8  | 0   | 0                  |         |
|     | 21/12/14 | Yes                          | 4.16  | 38.8 | Yes | 101.8 | VAP | N/A                |         |
|     | 22/12/14 | Yes                          | 7.32  | 40.9 | No  | 105.7 | N/A | N/A                |         |
|     | 23/12/14 | Yes                          | 6.16  | 39.9 | Yes |       | VAP | 0                  |         |
|     | 24/12/14 | N/A                          | N/A   | 38.8 | N/A |       | N/A | N/A                |         |
| 164 | 21/12/14 | Yes (not new or progressive) | 28.19 | 37.6 | No  | 99.6  | 0   | 0                  |         |
|     | 22/12/14 | Yes (not new or progressive) | 21.64 | 38.2 | Yes | 100.7 | 0   | 0                  |         |
|     | 23/12/14 | Yes (not new or progressive) | 19.15 | 38.0 | No  | 100.4 | 0   | 0                  |         |
|     | 24/12/14 | Yes (not new or progressive) | 14.08 | 38.1 | N/A | 100.6 | N/A | N/A                |         |
|     | 25/12/14 | Yes (not new or progressive) | 14.86 | 37.8 | N/A | 99.98 | N/A | N/A                |         |
|     | 26/12/14 | Yes (not new or progressive) | 15.93 | 37.8 | Yes | 100.1 | 0   | 0                  |         |
|     | 27/12/14 | Yes (not new or progressive) | 17.86 | 38.1 | Yes | 100.6 | 0   | 0                  |         |
|     | 28/12/14 | Yes (not new or progressive) | 13.97 | 38.4 | Yes | 101.1 | 0   | 0                  |         |
|     | 29/12/14 | Yes (not new or progressive) | 14.11 | 38.6 | Yes | 101.5 | 0   | 1+ EC              |         |
|     | 30/12/14 | Yes (not new or progressive) | 14.51 | 37.5 | Yes | 99.5  | 0   | 0                  |         |
|     | 31/12/14 | Yes (not new or progressive) | 12.4  | 38.3 | N/A | 101   | N/A | N/A                |         |
|     | 01/01/15 | Yes (not new or progressive) | 11.13 | 38.1 | N/A | 100.5 | N/A | N/A                |         |
|     | 02/01/15 | Yes (not new or progressive) | 10.08 | 38.0 | No  | 100.4 | 0   | 0                  |         |
|     | 03/01/15 | Yes (not new or progressive) | 8.69  | 37.9 | No  | 100.2 | 0   | 0                  |         |
|     | 04/01/15 | N/A                          | 8.74  | 37.5 | No  | 99.5  | 0   | 0                  |         |
|     | 05/01/15 | Yes (not new or progressive) | 9.51  | 37.2 | N/A | 98.9  | N/A | N/A                |         |
|     | 06/01/15 | Yes (not new or progressive) | 10.26 | 37.6 | N/A | 99.7  | N/A | N/A                |         |
|     | 07/01/15 | Yes (not new or progressive) | 9.05  | 38.1 | N/A | 100.6 | 0   | 0                  |         |
|     | 08/01/15 | Yes (not new or progressive) | 8.97  | 38.2 | N/A | 100.7 | N/A | N/A                |         |
| 165 | 21/12/14 | Yes (not new or progressive) | 20.42 | 36.8 | Yes | 98.2  | 2+  | 0                  |         |
|     | 22/12/14 | Yes (not new or progressive) | 11.93 | 37.1 | Yes | 98.8  | 0   | 0                  |         |
|     | 23/12/14 | Yes (not new or progressive) | 11.52 | 37.5 | N/A | 99.5  | N/A | N/A                |         |
| 166 | 27/12/14 | Yes (not new or progressive) | 11.91 | 36.9 | No  | 98.4  | N/A | N/A                |         |
|     | 28/12/14 | Yes (not new or progressive) | 7.24  | 36.5 | Yes | 97.7  | 0   | 0                  |         |
|     | 29/12/14 | No                           | 3.31  | 36.7 | No  | 98    | 0   | 0                  |         |
|     | 30/12/14 | No                           | 3.37  | 36.8 | No  | 98.3  | 0   | 0                  |         |
|     | 31/12/14 | Yes (new)                    | 2.74  | 36.6 | N/A | 97.8  | N/A | N/A                |         |
|     | 01/01/15 | No                           | 3.76  | 37.1 | N/A | 98.7  | N/A | N/A                |         |
| 167 | 28/12/14 | Yes (not new or progressive) | 31.57 | 36.7 | Yes | 98    | 0   | 0                  |         |
|     | 29/12/14 | Yes (not new or progressive) | 34.8  | 36.7 | N/A | 98    | N/A | N/A                |         |
|     | 30/12/14 | Yes (not new or progressive) | 36.59 | 36.3 | Yes | 97.4  | 0   | 0                  |         |
|     | 31/12/14 | Yes (not new or progressive) | 22.08 | 36.9 | N/A |       | N/A | N/A                |         |
|     | 01/01/15 | Yes (not new or progressive) | 11.47 | 36.7 | N/A |       | N/A | N/A                |         |
|     | 02/01/15 | Yes (not new or progressive) | 16.55 | 36.7 | Yes | 98.1  | 0   | 3+ GNR (MOST BKCC) |         |
|     | 03/01/15 | No                           | 16.18 | 36.7 | No  |       | 0   | 2+ GNR (MOST BKCC) |         |
|     | 04/01/15 | No                           | 18.42 | 37.0 | Yes | 98.6  | 0   | 0                  |         |

|     |          |                              |       |      |     |       |     |                    |  |
|-----|----------|------------------------------|-------|------|-----|-------|-----|--------------------|--|
|     | 05/01/15 | No                           | 15.76 | 36.6 | Yes | 97.9  | 0   | 2+ GNR (MOST BKCC) |  |
|     | 06/01/15 | No                           | 12.71 | 37.5 | Yes | 99.5  | 0   | 4+ GNR (MOST BKCC) |  |
|     | 07/01/15 | No                           | 19.89 | 37.3 | N/A | 99.1  | N/A | N/A                |  |
| 168 | 28/12/14 | Yes (not new or progressive) | 30.67 | 38.9 | N/A | 102.1 | N/A | N/A                |  |
|     | 29/12/14 | Yes (not new or progressive) | 24.88 | 37.6 | Yes | 99.6  | N/A | N/A                |  |
|     | 30/12/14 | Yes (not new or progressive) | 26.92 | 37.1 | N/A | 98.8  | N/A | N/A                |  |
|     | 31/12/14 | N/A                          | N/A   | N/A  | N/A |       | N/A | N/A                |  |
|     | 01/01/15 | N/A                          | N/A   | N/A  | N/A |       | N/A | N/A                |  |
| 169 | 29/12/14 | Yes (not new or progressive) | 13.57 | 37.8 | Yes | 100.1 | N/A | N/A                |  |
|     | 30/12/14 | No                           | 11.22 | 37.6 | Yes | 99.6  | 2+  | 0                  |  |
|     | 31/12/14 | Yes (new)                    | 7.92  | 36.9 | N/A | 98.5  | N/A | N/A                |  |
|     | 01/01/15 | Yes                          | 8.56  | 37.2 | Yes | 98.9  | N/A | N/A                |  |
|     | 02/01/15 | Yes                          | 9.23  | 37.2 | Yes | 98.9  | 3+  | 0                  |  |
|     | 03/01/15 | Yes                          | 9.35  | 37.6 | No  | 99.6  | 4+  | 3+ BKCC            |  |
|     | 04/01/15 | Yes                          | 9.61  | 37.2 | N/A | 99    | N/A | N/A                |  |
|     | 05/01/15 | Yes                          | 8.61  | 37.1 | N/A | 98.7  | N/A | N/A                |  |
|     | 06/01/15 | Yes                          | 8.13  | 36.9 | N/A | 98.5  | N/A | N/A                |  |
| 170 | 29/12/14 | No                           | 9.21  | 40.1 | No  | 104.1 | 0   | 0                  |  |
|     | 30/12/14 | Yes (new)                    | 14.14 | 39.0 | No  | 0     | 0   | 0                  |  |
|     | 31/12/14 | Yes                          | 10.01 | 38.5 | N/A | 101.3 | N/A | N/A                |  |
|     | 01/01/15 | Yes                          | 12.72 | 37.3 | N/A | 99.1  | N/A | N/A                |  |
|     | 02/01/15 | No                           | 8.59  | 39.8 | No  | 0     | 0   | 0                  |  |
|     | 03/01/15 | Yes (new)                    | 9.76  | 39.3 | No  | 102.7 | 0   | 0                  |  |
|     | 04/01/15 | Yes                          | 17.95 | 38.1 | No  | VAP   | 0   | 0                  |  |
|     | 05/01/15 | Yes                          | 9.1   | 36.9 | No  | 0     | 0   | 0                  |  |
|     | 06/01/15 | Yes                          | 7.69  | 36.6 | N/A | N/A   | N/A | N/A                |  |
|     | 07/01/15 | No                           | 6.15  | 36.8 | Yes | 98.3  | 0   | 0                  |  |
|     | 08/01/15 | No                           | 6.74  | 37.7 | No  | 99.8  | 0   | 0                  |  |
|     | 09/01/15 | Yes (new)                    | 7.8   | 37.2 | No  | 98.9  | 0   | 0                  |  |
|     | 10/01/15 | Yes                          | 6.63  | 36.6 | N/A | 97.9  | N/A | N/A                |  |
|     | 11/01/15 | Yes                          | 5.81  | 37.9 | Yes | 100.3 | 0   | 0                  |  |
|     | 12/01/15 | No                           | 6.14  | 37.4 | N/A | 99.4  | N/A | N/A                |  |
| 171 | 01/01/15 | Yes (not new or progressive) | 31.79 | 36.8 | Yes | 98.3  | N/A | N/A                |  |
|     | 02/01/15 | Yes (not new or progressive) | 55.89 | 37.2 | N/A | 98.9  | 0   | 0                  |  |
|     | 03/01/15 | Yes (not new or progressive) | 65.83 | 36.8 | N/A | 98.2  | 0   | 0                  |  |
|     | 04/01/15 | N/A                          | N/A   | N/A  | N/A |       | N/A | N/A                |  |
| 172 | 30/12/14 | Yes (not new or progressive) | N/A   | 37.2 | Yes | 98.9  | 0   | 0                  |  |
|     | 31/12/14 | Yes (not new or progressive) | 32.8  | 36.7 | N/A | 98    | N/A | N/A                |  |
|     | 01/01/15 | Yes (not new or progressive) | 27.91 | 36.6 | N/A | 97.9  | N/A | N/A                |  |
|     | 02/01/15 | Yes (not new or progressive) | 31.45 | 36.9 | Yes | 98.5  | 0   | 0                  |  |
|     | 03/01/15 | Yes (not new or progressive) | 24.12 | 36.9 | No  | 98.5  | 0   | 0                  |  |
|     | 04/01/15 | Yes (not new or progressive) | 21.56 | 37.3 | Yes | 99.1  | 0   | 0                  |  |
|     | 05/01/15 | Yes (not new or progressive) | 19.62 | 37.6 | Yes | 99.7  | 0   | 0                  |  |
|     | 06/01/15 | Yes (not new or progressive) | 23.31 | 38.0 | No  | 100.4 | 0   | 0                  |  |
|     | 07/01/15 | Yes (not new or progressive) | 22.91 | 37.5 | No  | 99.5  | N/A | N/A                |  |
|     | 08/01/15 | Yes (not new or progressive) | 24.12 | 37.3 | Yes | 99.2  | 0   | 0                  |  |
|     | 09/01/15 | Yes (progressive)            | 22.14 | 38.1 | No  | 100.5 | VAP | 0                  |  |
|     | 10/01/15 | Yes                          | 21.36 | 37.2 | Yes | 98.9  | VAP | 0                  |  |
|     | 11/01/15 | Yes                          | 24.41 | 37.3 | Yes | 99.1  | VAP | 0                  |  |
|     | 12/01/15 | Yes                          | 20.16 | 36.9 | No  | 98.4  | 0   | 0                  |  |
|     | 13/01/15 | No                           | 17.96 | 37.2 | Yes | 99    | 0   | 0                  |  |
|     | 14/01/15 | No                           | 15.64 | 37.4 | N/A | 99.3  | N/A | N/A                |  |
|     | 15/01/15 | Yes (new)                    | 17.03 | 36.9 | Yes | 98.5  | VAP | 0                  |  |
|     | 16/01/15 | N/A                          | 12.51 | 37.0 | No  | 98.6  | 0   | 0                  |  |
|     | 17/01/15 | No                           | 8.8   | 37.4 | No  | 99.3  | 0   | 0                  |  |
|     | 18/01/15 | No                           | N/A   | 38.1 | Yes | 100.6 | 0   | 0                  |  |
|     | 19/01/15 | Yes (new)                    | 7.84  | 38.1 | No  | 100.5 | 0   | 0                  |  |
|     | 20/01/15 | Yes                          | 8.63  | 37.1 | N/A | 98.8  | 0   | 0                  |  |
|     | 21/01/15 | N/A                          | N/A   | N/A  | N/A |       | N/A | N/A                |  |
|     | 22/01/15 | N/A                          | N/A   | N/A  | N/A |       | N/A | N/A                |  |
| 173 | 30/12/14 | Yes (not new or progressive) | 18.22 | 36.6 | N/A | 97.8  | N/A | N/A                |  |
|     | 31/12/14 | Yes (not new or progressive) | 11.94 | 37.1 | N/A | 98.8  | N/A | N/A                |  |
|     | 01/01/15 | Yes (not new or progressive) | 12.02 | 36.9 | N/A | 98.4  | N/A | N/A                |  |
|     | 02/01/15 | No                           | 19.35 | 36.5 | Yes | 97.7  | 0   | 4+ SERM            |  |
|     | 03/01/15 | No                           | 12.95 | 36.6 | N/A | 97.9  | N/A | N/A                |  |
|     | 04/01/15 | No                           | 15.23 | 36.6 | N/A | 97.9  | N/A | N/A                |  |
| 174 | 30/12/14 | No                           | 11.09 | 36.8 | No  | 98.2  | 0   | 0                  |  |
|     | 31/12/14 | No                           | 9.72  | 37.1 | N/A | 98.7  | N/A | N/A                |  |
|     | 01/01/15 | Yes (new)                    | 10.2  | 36.9 | N/A | 98.4  | N/A | N/A                |  |
| 175 | 30/12/14 | Yes (not new or progressive) | 6.71  | 39.7 | Yes | 103.4 | 0   | 0                  |  |
|     | 31/12/14 | Yes (not new or progressive) | 5.1   | 37.6 | N/A | 99.6  | N/A | N/A                |  |
|     | 01/01/15 | Yes (not new or progressive) | 5.11  | 37.1 | N/A | 98.8  | N/A | N/A                |  |
|     | 02/01/15 | Yes (not new or progressive) | 3.99  | 36.8 | No  | 98.2  | 0   | 0                  |  |
|     | 03/01/15 | Yes (not new or progressive) | 5.31  | 36.9 | N/A | 98.4  | N/A | N/A                |  |
|     | 04/01/15 | Yes (not new or progressive) | 6.06  | 36.7 | N/A | 98.1  | N/A | N/A                |  |
| 176 | 30/12/14 | No                           | 9.71  | 36.4 | Yes | 97.6  | 0   | 0                  |  |
|     | 31/12/14 | No                           | 8.2   | 36.9 | N/A | 98.4  | N/A | N/A                |  |
|     | 01/01/15 | No                           | 9.8   | 36.9 | N/A | 98.5  | N/A | N/A                |  |
|     | 02/01/15 | No                           | 13.9  | 37.6 | Yes | 99.6  | 0   | 0                  |  |
|     | 03/01/15 | No                           | 19.37 | 37.3 | N/A | 99.1  | N/A | N/A                |  |
|     | 04/01/15 | No                           | 18.22 | 37.2 | N/A | 98.9  | N/A | N/A                |  |
| 177 | 03/01/15 | Yes (not new or progressive) | 12.66 | 36.7 | Yes | 98.1  | 0   | 4+ PSA             |  |
|     | 04/01/15 | N/A                          | 24.5  | 36.8 | No  | 98.2  | 0   | 3+ PSA             |  |
|     | 05/01/15 | N/A                          | N/A   | 36.9 | Yes | 98.5  | 0   | 3+ PSA             |  |
|     | 06/01/15 | N/A                          | N/A   | N/A  | N/A |       | N/A | N/A                |  |
| 178 | 03/01/15 | Yes (not new or progressive) | 14.47 | 39.4 | Yes | 103   | 0   | 2+ MCAT            |  |
|     | 04/01/15 | Yes (not new or progressive) | 11.9  | 39.3 | Yes | 102.7 | 0   | 0                  |  |
|     | 05/01/15 | Yes (not new or progressive) | 6.53  | 37.6 | Yes | 99.7  | 0   | 0                  |  |
|     | 06/01/15 | No                           | 4.69  | 37.4 | N/A | 99.4  | N/A | N/A                |  |
| 179 | 04/06/15 | Yes (not new or progressive) | 17.34 | 37.2 | Yes | 99    | 2+  | 0                  |  |
|     | 05/06/15 | Yes (not new or progressive) | 16.2  | 37.3 | N/A | 99.2  | N/A | N/A                |  |
|     | 06/06/15 | Yes (not new or progressive) | 11.46 | 37.4 | Yes | 99.3  | 0   | 0                  |  |
|     | 07/06/15 | Yes (not new or progressive) | 9.45  | 37.7 | Yes | 99.8  | 2+  | 0                  |  |
|     | 08/06/15 | Yes (not new or progressive) | 8.94  | 38.0 | No  | 100.4 | 1+  | 0                  |  |
|     | 09/06/15 | Yes (progressive)            | 7.92  | 37.9 | Yes | 100.2 | 1+  | 0                  |  |
|     | 10/06/15 | Yes                          | 8.17  | 37.1 | Yes | 98.7  | 1+  | 0                  |  |
|     | 11/06/15 | Yes                          | N/A   | 36.8 | Yes | 98.2  | 1+  | 0                  |  |
|     | 12/06/15 | Yes                          | 8.7   | 36.8 | Yes | 98.3  | 2+  | 0                  |  |
|     | 13/06/15 | Yes                          | 8.2   | 36.8 | No  | 98.2  | 1+  | 0                  |  |
|     | 14/06/15 | Yes                          | 8.49  | 37.2 | N/A | 99    | N/A | N/A                |  |
|     | 15/06/15 | Yes                          | N/A   | 36.9 | Yes | 98.4  | 1+  | 0                  |  |
|     | 16/06/15 | Yes                          | 6.76  | 37.1 | Yes | 98.8  | 0   | 0                  |  |
| 180 | 04/01/15 | No                           | 3.9   | 33.7 | Yes | 92.6  | 0   | 4+ KP; 2+ PMIR     |  |
|     | 05/01/15 | No                           | 6.36  | 38.7 | N/A | 101.6 | 0   | 3+ KP; 2+ PMIR     |  |
|     | 06/01/15 | Yes (new)                    | N/A   | 37.9 | N/A | 100.2 | N/A | N/A                |  |
|     | 07/01/15 | Yes                          | 6.41  | N/A  | N/A |       | N/A | N/A                |  |
| 181 | 06/06/15 | Yes (not new or progressive) | 17.36 | 37.7 | No  | 99.9  | 0   | 0                  |  |
|     | 07/06/15 | Yes (not new or progressive) | 18.17 | 37.6 | No  | 99.6  | 0   | 0                  |  |
|     | 08/06/15 | Yes (not new or progressive) | 15.89 | 37.7 | No  | 99.9  | 0   | 0                  |  |
|     | 09/06/15 | N/A                          | 14.73 | 38.2 | No  | 100.8 | N/A | N/A                |  |
|     | 10/06/15 | Yes (progressive)            | 13.25 | 38.9 | No  | 102.1 | VAP | 0                  |  |

|     |          |                              |       |      |     |       |     |     |      |              |
|-----|----------|------------------------------|-------|------|-----|-------|-----|-----|------|--------------|
|     | 11/06/15 | Yes                          | 13.05 | 37.3 | No  | 99.2  | 0   | 0   |      |              |
|     | 12/06/15 | N/A                          | 12.74 | 38.7 | Yes | 101.6 | 0   | 0   |      |              |
|     | 13/06/15 | Yes                          | 12.67 | 38.6 | No  | 101.4 | VAP | N/A | N/A  |              |
|     | 14/06/15 | Yes                          | 12.32 | 37.6 | N/A | 99.6  | N/A | N/A | N/A  |              |
|     | 15/06/15 | Yes (progressive)            | 13.13 | 37.2 | No  | 98.9  | 0   | 0   |      |              |
|     | 16/06/15 | Yes                          | 14.75 | 37.4 | No  | 99.4  | 0   | 0   |      |              |
|     | 17/06/15 | Yes (progressive)            | 18.86 | 38.2 | No  | 100.8 | VAP | 0   | 0    |              |
|     | 18/06/15 | Yes                          | 18.75 | 39.4 | No  | 102.9 | VAP | 0   | 0    |              |
|     | 19/06/15 | Yes                          | 16.68 | 38.9 | No  | 102.1 | VAP | 0   | 0    |              |
|     | 20/06/15 | Yes                          | 15.63 | 37.8 | No  | 100   | 0   | 0   |      |              |
|     | 21/06/15 | Yes                          | 15.51 | 38.5 | No  | 101.3 | VAP | 0   | 0    |              |
|     | 22/06/15 | Yes                          | 16.64 | 38.7 | No  | 101.6 | VAP | 0   | 0    |              |
|     | 23/06/15 | Yes                          | 17.98 | 38.7 | No  | 101.7 | VAP | 0   | 0    |              |
|     | 24/06/15 | Yes                          | 22.99 | 37.8 | No  | 100   | 0   | 0   |      |              |
|     | 25/06/15 | Yes                          | 17.87 | 37.6 | No  | 99.7  | 0   | 0   |      |              |
|     | 26/06/15 | Yes                          | 15.72 | 38.4 | No  | 101.1 | VAP | 0   | 0    |              |
|     | 27/06/15 | N/A                          | N/A   | 36.9 | N/A | 98.4  | N/A | N/A | N/A  |              |
| 182 | 07/01/15 | N/A                          | 8.14  | 36.9 | Yes | 98.4  | 4+  | 0   |      |              |
|     | 08/01/15 | No                           | 4.73  | 36.9 | Yes | 98.4  | 4+  | 0   |      |              |
|     | 09/01/15 | No                           | 6.16  | 36.9 | No  | 98.4  | 4+  | 0   |      |              |
|     | 10/01/15 | Yes (new)                    | 7.27  | 36.6 | N/A | 97.9  | N/A | N/A | N/A  |              |
| 183 | 07/01/15 | N/A                          | 16.92 | 37.3 | Yes | 99.1  | 0   | 0   |      |              |
|     | 08/01/15 | Yes (not new or progressive) | 16.64 | 37.3 | No  | 99.1  | 0   | 0   |      |              |
|     | 09/01/15 | Yes (not new or progressive) | 14.6  | 37.4 | No  | 99.3  | 0   | 0   |      |              |
|     | 10/01/15 | Yes (not new or progressive) | 11.41 | 37.3 | No  | 99.2  | N/A | N/A | N/A  |              |
|     | 11/01/15 | Yes (not new or progressive) | 11.37 | 37.7 | No  | 99.9  | N/A | N/A | N/A  |              |
|     | 12/01/15 | Yes (not new or progressive) | 11.17 | 37.9 | No  | 100.2 | 0   | 0   |      |              |
|     | 13/01/15 | Yes (not new or progressive) | 11.92 | 37.8 | No  | 100.1 | 0   | 0   |      |              |
|     | 14/01/15 | Yes (not new or progressive) | 15.08 | 37.3 | Yes | 99.2  | 0   | 0   |      |              |
|     | 15/01/15 | Yes (not new or progressive) | 14.28 | 37.1 | No  | 98.8  | 0   | 0   |      |              |
|     | 16/01/15 | Yes (not new or progressive) | 12.75 | 37.3 | No  | 99.2  | 0   | 0   |      |              |
|     | 17/01/15 | Yes (not new or progressive) | 13.69 | 36.9 | No  | 98.4  | 0   | 0   |      |              |
|     | 18/01/15 | Yes (not new or progressive) | 16.19 | 37.2 | No  | 99    | 0   | 0   |      |              |
|     | 19/01/15 | Yes (not new or progressive) | 20.76 | 37.4 | Yes | 99.3  | 0   | 0   |      |              |
|     | 20/01/15 | Yes (progressive)            | 21.44 | 37.0 | No  | 98.6  | N/A | N/A | N/A  |              |
|     | 21/01/15 | Yes                          | N/A   | 37.5 | No  | 99.5  | 0   | 1+  | CTFX |              |
|     | 22/01/15 | Yes                          | 16.39 | 37.9 | No  | 100.3 | 0   | 0   |      |              |
|     | 23/01/15 | Yes                          | 15.88 | 38.1 | Yes | 100.5 | VAP | 0   | 2+   | CTFX         |
|     | 24/01/15 | Yes                          | 13.87 | 37.3 | N/A | 99.2  | N/A | N/A | N/A  |              |
|     | 25/01/15 | Yes                          | 15.15 | 37.3 | No  | 99.2  | 0   | 0   | 2+   | CTFX         |
|     | 26/01/15 | Yes                          | 16.84 | 37.7 | Yes | 99.9  | VAP | 0   | 3+   | CTFX         |
|     | 27/01/15 | Yes                          | 14.61 | 38.5 | Yes | 101.3 | VAP | 0   | 3+   | CTFX; 3+ PSA |
|     | 28/01/15 | Yes                          | 14.84 | 38.4 | N/A | 101.2 | VAP | N/A | N/A  | N/A          |
| 184 | 11/01/15 | Yes (not new or progressive) | 9.82  | 38.4 | Yes | 101.2 | 0   | 0   |      |              |
|     | 12/01/15 | Yes (not new or progressive) | 10.21 | 37.2 | No  | 99    | 2+  | 0   |      |              |
|     | 13/01/15 | Yes (not new or progressive) | 25.2  | 37.7 | No  | 99.9  | 1+  | 0   |      |              |
|     | 14/01/15 | N/A                          | N/A   | 37.3 | N/A | 99.1  | N/A | N/A | N/A  | N/A          |
|     | 15/01/15 | N/A                          | N/A   | N/A  | N/A | N/A   | N/A | N/A | N/A  | N/A          |
| 185 | 11/01/15 | No                           | 13.85 | 37.8 | Yes | 100   | 0   | 0   |      |              |
|     | 12/01/15 | Yes (new)                    | 9.18  | 37.1 | No  | 98.8  | 0   | 0   |      |              |
|     | 13/01/15 | No                           | 9.44  | 37.1 | N/A | 98.7  | N/A | N/A | N/A  | N/A          |
| 186 | 12/01/15 | Yes (not new or progressive) | 14.5  | 39.9 | No  | 103.8 | 0   | 0   |      |              |
|     | 13/01/15 | Yes (not new or progressive) | 7.36  | 39.5 | Yes | 103.1 | 0   | 0   |      |              |
|     | 14/01/15 | Yes (not new or progressive) | 5.62  | 36.2 | No  | 97.1  | 0   | 0   |      |              |
|     | 15/01/15 | Yes (not new or progressive) | 11.76 | 36.6 | No  | 97.8  | 0   | 0   |      |              |
|     | 16/01/15 | No                           | 16.84 | 36.6 | N/A | 97.8  | N/A | N/A | N/A  | N/A          |
|     | 17/01/15 | No                           | 11.7  | 36.6 | Yes | 97.8  | 0   | 0   |      |              |
|     | 18/01/15 | Yes (new)                    | 14.39 | 36.8 | Yes | 98.3  | VAP | 0   | 0    |              |
|     | 19/01/15 | Yes                          | 19.09 | 37.0 | Yes | 98.6  | VAP | 0   | 0    |              |
|     | 20/01/15 | Yes                          | 24.63 | 36.6 | Yes | 97.8  | VAP | 0   | 0    |              |
|     | 21/01/15 | Yes                          | 54.81 | 37.1 | No  | 98.8  | 0   | 0   |      |              |
|     | 22/01/15 | Yes                          | 40.55 | 37.4 | No  | 99.3  | 0   | 0   |      |              |
|     | 23/01/15 | Yes                          | 39.64 | 38.1 | Yes | 100.5 | VAP | 0   | 0    |              |
|     | 24/01/15 | Yes                          | 42.42 | 37.9 | N/A | 100.2 | N/A | N/A | N/A  | N/A          |
|     | 25/01/15 | Yes                          | 28.92 | 36.0 | Yes | 96.8  | VAP | 0   | 0    |              |
|     | 26/01/15 | Yes                          | 34.42 | 36.5 | Yes | 97.7  | VAP | 0   | 0    |              |
|     | 27/01/15 | Yes                          | 33.17 | 37.2 | N/A | 98.9  | N/A | N/A | N/A  | N/A          |
|     | 28/01/15 | No                           | 29.3  | 36.9 | N/A | 98.5  | N/A | N/A | N/A  | N/A          |
|     | 29/01/15 | No                           | 28.36 | 36.9 | Yes | 98.4  | 0   | 0   |      |              |
|     | 30/01/15 | Yes (new)                    | 28.64 | 37.2 | Yes | 99    | VAP | 0   | 0    |              |
|     | 31/01/15 | No                           | 25.15 | 37.0 | Yes | 98.6  | 0   | 0   |      |              |
|     | 01/02/15 | N/A                          | 17.93 | 37.2 | Yes | 98.9  | 0   | 0   |      |              |
|     | 02/02/15 | Yes (new)                    | 15.63 | 37.2 | Yes | 99    | VAP | 0   | 0    |              |
|     | 03/02/15 | No                           | 14.32 | 37.7 | Yes | 99.9  | 0   | 0   |      |              |
|     | 04/02/15 | No                           | 19.38 | 38.1 | Yes | 100.5 | 0   | 0   |      |              |
|     | 05/02/15 | No                           | 18.38 | 38.3 | N/A | 100.9 | N/A | N/A | N/A  | N/A          |
| 187 | 08/06/15 | Yes (not new or progressive) | 9.73  | 38.8 | No  | 101.9 | 1+  | 0   |      |              |
|     | 09/06/15 | Yes (not new or progressive) | 8.2   | 39.4 | No  | 103   | N/A | N/A | N/A  | N/A          |
|     | 10/06/15 | Yes (not new or progressive) | 6.52  | 39.1 | No  | 102.3 | 0   | 0   |      |              |
|     | 11/06/15 | No                           | N/A   | 38.0 | Yes | 100.4 | 0   | 0   |      |              |
|     | 12/06/15 | No                           | 7.46  | 37.8 | Yes | 100.1 | 0   | 0   |      |              |
|     | 13/06/15 | Yes (new)                    | 9.31  | 37.9 | Yes | 100.3 | 0   | 0   |      |              |
|     | 14/06/15 | No                           | 12.37 | 37.9 | N/A | 100.3 | N/A | N/A | N/A  | N/A          |
|     | 15/06/15 | Yes (new)                    | 17.58 | 37.5 | Yes | 99.5  | VAP | 0   | 0    |              |
|     | 16/06/15 | No                           | 17.2  | 37.6 | Yes | 99.7  | 0   | 0   |      |              |
|     | 17/06/15 | No                           | 15.73 | 37.8 | No  | 100   | 0   | 0   |      |              |
|     | 18/06/15 | No                           | 18.93 | 37.3 | No  | 99.1  | 0   | 0   |      |              |
|     | 19/06/15 | N/A                          | N/A   | 37.1 | N/A | 98.7  | N/A | N/A | N/A  | N/A          |
| 188 | 16/01/15 | No                           | 11.8  | 38.2 | N/A | 100.7 | N/A | N/A | N/A  | N/A          |
|     | 17/01/15 | No                           | 12.79 | 38.0 | No  | 100.4 | 0   | 0   |      |              |
|     | 18/01/15 | No                           | 13.13 | 38.1 | No  | 100.6 | 0   | 0   |      |              |
|     | 19/01/15 | Yes (new)                    | 12.76 | 37.3 | N/A | 99.2  | N/A | N/A | N/A  | N/A          |
|     | 20/01/15 | Yes                          | 14.01 | 37.8 | N/A | 100.1 | N/A | N/A | N/A  | N/A          |
| 189 | 17/01/15 | Yes (not new or progressive) | 10.16 | 37.9 | No  | 100.2 | 0   | 0   |      |              |
|     | 18/01/15 | Yes (not new or progressive) | 9     | 37.5 | No  | 99.5  | 0   | 0   |      |              |
|     | 19/01/15 | Yes (not new or progressive) | 11.01 | 37.6 | Yes | 99.6  | 0   | 0   |      |              |
|     | 20/01/15 | No                           | 10.2  | 37.3 | N/A | 99.1  | N/A | N/A | N/A  | N/A          |
|     | 21/01/15 | No                           | 12.67 | 37.0 | N/A | 98.6  | N/A | N/A | N/A  | N/A          |
| 190 | 17/01/15 | Yes (not new or progressive) | 17.97 | 37.4 | N/A | 99.3  | N/A | N/A | N/A  | N/A          |
|     | 18/01/15 | No                           | 14.36 | 37.0 | No  | 98.6  | 0   | 0   |      |              |
|     | 19/01/15 | Yes (new)                    | 14.23 | 37.1 | N/A | 98.7  | N/A | N/A | N/A  | N/A          |
|     | 20/01/15 | Yes                          | 13.3  | 36.8 | Yes | 98.3  | VAP | 0   | 0    |              |
|     | 21/01/15 | Yes                          | 13.3  | 37.2 | No  | 98.9  | 0   | 0   |      |              |
|     | 22/01/15 | Yes                          | 13.3  | 36.9 | No  | 98.5  | 0   | 0   |      |              |
|     | 23/01/15 | Yes                          | 13.01 | 37.3 | Yes | 99.1  | VAP | 0   | 0    |              |
|     | 24/01/15 | Yes                          | 14.11 | 37.9 | No  | 100.2 | 0   | 0   |      |              |
|     | 25/01/15 | Yes                          | 16.55 | 38.2 | Yes | 100.7 | VAP | 0   | 0    |              |
|     | 26/01/15 | Yes                          | 17.66 | 37.6 | N/A | 99.7  | N/A | N/A | N/A  | N/A          |
|     | 27/01/15 | Yes                          | 14.94 | 37.7 | N/A | 99.9  | N/A | N/A | N/A  | N/A          |
|     | 28/01/15 | No                           | 12.47 | 36.8 | No  | 98.3  | 0   | 0   |      |              |
|     | 29/01/15 | N/A                          | N/A   | N/A  | N/A | N/A   | N/A | N/A | N/A  | N/A          |
| 191 | 18/01/15 | Yes (not new or progressive) | 11.56 | 36.8 | No  | 98.2  | 0   | 0   |      |              |
|     | 19/01/15 | No                           | 11.17 | 37.1 | Yes | 98.7  | 0   | 0   |      |              |

|     |          |                              |       |      |     |       |     |     |                  |
|-----|----------|------------------------------|-------|------|-----|-------|-----|-----|------------------|
|     | 20/01/15 | No                           | 13.53 | 38.2 | No  | 100.7 | N/A | N/A |                  |
|     | 21/01/15 | No                           | 13.13 | 37.6 | N/A | 99.6  | 0   | 0   |                  |
|     | 22/01/15 | Yes (new)                    | 15.69 | 36.7 | No  | 98.1  | 0   | 0   |                  |
|     | 23/01/15 | Yes                          | 19.07 | 37.3 | Yes | 99.1  | VAP | 0   |                  |
|     | 24/01/15 | Yes                          | 14.39 | 37.2 | N/A | 98.9  | N/A | N/A |                  |
|     | 25/01/15 | Yes                          | 16.09 | 37.1 | Yes | 98.7  | VAP | 0   | 1+ PSA; 2+ PSA   |
|     | 26/01/15 | Yes                          | 21.2  | 37.3 | Yes | 99.1  | VAP | 0   | (OMOR)           |
|     | 27/01/15 | Yes                          | 16.17 | 37.2 | Yes | 98.9  | VAP | 0   | 3+ PSA           |
|     | 28/01/15 | Yes                          | 17.84 | 37.2 | Yes | 98.9  | VAP | 0   | 4+ PSA           |
|     | 29/01/15 | Yes                          | 15.37 | 38.1 | Yes | 100.5 | VAP | 0   | 3+ PSA           |
|     | 30/01/15 | Yes                          | 13.39 | 37.2 | Yes | 99    | VAP | 0   | 2+ PSA           |
|     | 31/01/15 | Yes                          | 15.07 | 37.6 | Yes | 99.7  | VAP | 0   | 3+ PSA           |
|     | 01/02/15 | Yes                          | 13.07 | 36.7 | N/A | 98    | N/A | N/A | 4+ PSA (MORP2)   |
| 192 | 19/01/15 | No                           | 15.4  | 38.2 | N/A | 100.7 | N/A | N/A |                  |
|     | 20/01/15 | No                           | 21.96 | 37.1 | Yes | 98.8  | 0   | 0   |                  |
|     | 21/01/15 | No                           | 19.5  | 38.0 | No  | 100.4 | 0   | 0   |                  |
|     | 22/01/15 | No                           | 17.72 | 37.5 | Yes | 99.5  | 0   | 0   |                  |
| 193 | 09/06/15 | Yes (not new or progressive) | 20.89 | 37.6 | No  | 99.7  | 0   | 0   |                  |
|     | 10/06/15 | Yes (not new or progressive) | 46.29 | 38.0 | No  | 100.4 | 0   | 0   |                  |
| 194 | 22/01/15 | No                           | 20.16 | 39.3 | N/A | 102.7 | N/A | N/A |                  |
|     | 23/01/15 | No                           | 26.39 | 39.7 | Yes | 103.4 | 0   | 0   |                  |
|     | 24/01/15 | N/A                          | N/A   | N/A  | N/A | N/A   | N/A | N/A |                  |
| 195 | 29/01/15 | Yes (not new or progressive) | 12.53 | 37.4 | N/A | 99.3  | N/A | N/A |                  |
|     | 30/01/15 | No                           | 12.19 | 38.6 | Yes | 101.4 | 0   | 0   |                  |
|     | 31/01/15 | No                           | 11.12 | 37.3 | No  | 99.1  | 0   | 0   |                  |
|     | 01/02/15 | No                           | 7.99  | 38.2 | No  | 100.7 | 0   | 0   |                  |
|     | 02/02/15 | Yes (new)                    | 9.92  | 37.7 | Yes | 99.9  | 0   | 0   |                  |
|     | 03/02/15 | No                           | 11.53 | 37.8 | No  | 100.1 | 0   | 0   |                  |
|     | 04/02/15 | Yes (new)                    | 13.08 | 38.2 | Yes | 100.7 | VAP | 0   |                  |
|     | 05/02/15 | Yes                          | 14.15 | 37.3 | N/A | 99.1  | N/A | N/A |                  |
|     | 06/02/15 | No                           | 14.92 | 37.0 | N/A | 98.6  | N/A | N/A |                  |
|     | 07/02/15 | Yes (new)                    | 15.35 | 37.2 | N/A | 98.9  | N/A | N/A |                  |
| 196 | 31/01/15 | No                           | 4.75  | 38.5 | No  | 98.5  | 0   | 0   |                  |
|     | 01/02/15 | No                           | 25.59 | 37.4 | No  | 98.7  | N/A | N/A |                  |
|     | 02/02/15 | No                           | 25.89 | 37.1 | N/A | 99.1  | 0   | 0   |                  |
|     | 03/02/15 | No                           | 18.38 | 37.3 | No  | 98.9  | 0   | 0   |                  |
|     | 04/02/15 | Yes (new)                    | 21.43 | 37.2 | No  | 99.9  | N/A | N/A |                  |
|     | 05/02/15 | Yes                          | 27.06 | 37.7 | N/A | 98.9  | N/A | N/A |                  |
|     | 06/02/15 | Yes                          | 39.01 | 37.2 | No  | 99.9  | N/A | N/A |                  |
|     | 07/02/15 | Yes                          | 39.18 | 37.4 | Yes | 99.3  | VAP | 0   |                  |
|     | 08/02/15 | Yes                          | 27.7  | 37.3 | No  | 99.1  | 0   | 0   |                  |
|     | 09/02/15 | Yes                          | 18.67 | 37.5 | No  | 99.5  | 0   | 0   |                  |
|     | 10/02/15 | Yes                          | 15.48 | 37.8 | N/A | 100.1 | N/A | N/A |                  |
|     | 11/02/15 | Yes                          | 15.11 | 37.3 | No  | 99.1  | 0   | 0   |                  |
|     | 12/02/15 | Yes                          | 13.33 | 36.9 | N/A | 98.5  | N/A | N/A |                  |
|     | 13/02/15 | Yes                          | 10.31 | 37.1 | N/A | 98.8  | N/A | N/A |                  |
|     | 14/02/15 | Yes                          | 9.68  | 37.1 | No  | 98.8  | 0   | 0   |                  |
| 197 | 01/02/15 | Yes (not new or progressive) | 14.75 | 36.8 | Yes | 98.2  | 0   | 0   | 4+ SERM          |
|     | 02/02/15 | Yes (not new or progressive) | 15.87 | 36.0 | Yes | 96.8  | 0   | 0   | 4+ SERM          |
|     | 03/02/15 | No                           | 18.11 | 37.0 | Yes | 98.6  | 0   | 0   | 4+ SERM; 4+ ACCL |
|     | 04/02/15 | Yes (new)                    | 15.4  | 37.3 | N/A | 99.1  | N/A | N/A |                  |
| 198 | 08/02/15 | Yes (not new or progressive) | 15.27 | 37.1 | N/A | 98.7  | N/A | N/A |                  |
|     | 09/02/15 | Yes (not new or progressive) | 10.58 | 38.8 | Yes | 101.8 | 0   | 0   |                  |
|     | 10/02/15 | Yes (not new or progressive) | 9.28  | 37.9 | Yes | 100.2 | 0   | 0   |                  |
|     | 11/02/15 | Yes (not new or progressive) | 7.99  | 37.7 | Yes | 99.8  | 0   | 0   |                  |
|     | 12/02/15 | Yes (not new or progressive) | 7.05  | 37.3 | Yes | 99.1  | 0   | 0   |                  |
|     | 13/02/15 | No                           | 8.99  | 37.3 | No  | 99.2  | 0   | 0   |                  |
|     | 14/02/15 | No                           | 7.94  | 37.1 | N/A | 98.7  | N/A | N/A |                  |
|     | 15/02/15 | N/A                          | 7.96  | 37.3 | N/A | 99.1  | N/A | N/A |                  |
|     | 16/02/15 | N/A                          | N/A   | 37.2 | N/A | 98.9  | N/A | N/A |                  |
| 199 | 08/02/15 | Yes (not new or progressive) | 8.82  | 40.6 | N/A | 105   | N/A | N/A |                  |
|     | 09/02/15 | No                           | 10.96 | 37.8 | Yes | 100   | 0   | 0   |                  |
|     | 10/02/15 | No                           | 9.8   | 37.2 | No  | 99    | 0   | 0   |                  |
|     | 11/02/15 | No                           | 8.61  | 37.2 | Yes | 99    | 0   | 0   |                  |
|     | 12/02/15 | Yes (new)                    | 9.17  | 36.9 | Yes | 98.5  | 0   | 0   |                  |
|     | 13/02/15 | Yes                          | 8.08  | 36.8 | No  | 98.3  | 0   | 0   |                  |
|     | 14/02/15 | N/A                          | N/A   | 37.1 | Yes | 98.7  | 0   | 0   |                  |
|     | 15/02/15 | Yes (progressive)            | 7.65  | 37.2 | Yes | 99    | 0   | 0   |                  |
|     | 16/02/15 | Yes                          | 10.91 | 37.2 | Yes | 99    | 0   | 0   |                  |
|     | 17/02/15 | No                           | 11.65 | 37.1 | Yes | 98.8  | 0   | 0   |                  |
|     | 18/02/15 | No                           | 9.56  | 37.3 | No  | 99.2  | 0   | 0   |                  |
|     | 19/02/15 | No                           | 11.52 | 37.3 | Yes | 99.2  | 0   | 0   |                  |
|     | 20/02/15 | No                           | 12.41 | 37.4 | No  | 99.4  | 0   | 0   |                  |
|     | 21/02/15 | No                           | 10.71 | 37.1 | No  | 98.8  | 0   | 0   |                  |
|     | 22/02/15 | No                           | 8.55  | 36.9 | N/A | 98.4  | N/A | N/A |                  |
|     | 23/02/15 | Yes (new)                    | 8.42  | 36.7 | No  | 98    | 0   | 0   |                  |
|     | 24/02/15 | Yes                          | 7.68  | 36.8 | No  | 98.3  | 0   | 0   |                  |
|     | 25/02/15 | No                           | 8.83  | 37.1 | No  | 98.7  | 0   | 0   |                  |
|     | 26/02/15 | No                           | 8.84  | 36.7 | No  | 98    | N/A | N/A |                  |
| 200 | 08/02/15 | No                           | 27.96 | 37.5 | N/A | 99.5  | N/A | N/A |                  |
|     | 09/02/15 | Yes (new)                    | 23.69 | 38.5 | Yes | 101.3 | VAP | 0   |                  |
|     | 10/02/15 | No                           | 24.44 | 39.7 | Yes | 103.4 | 0   | 0   |                  |
|     | 11/02/15 | No                           | 36.99 | 37.8 | No  | 100   | 0   | 0   |                  |
|     | 12/02/15 | No                           | 40.28 | 38.3 | N/A | 100.9 | N/A | N/A |                  |
|     | 13/02/15 | No                           | 40.41 | 37.0 | N/A | 98.6  | N/A | N/A |                  |
|     | 14/02/15 | No                           | 36.56 | 38.3 | N/A | 100.9 | N/A | N/A |                  |
|     | 15/02/15 | No                           | 31.65 | 38.5 | N/A | 101.3 | N/A | N/A |                  |
|     | 16/02/15 | No                           | 17.37 | N/A  | N/A | N/A   | N/A | N/A |                  |
| 201 | 11/02/15 | No                           | 5.24  | 36.7 | Yes | 98    | 0   | 0   |                  |
|     | 12/02/15 | Yes (new)                    | 5.17  | 39.0 | Yes | 102.2 | 0   | 0   |                  |
|     | 13/02/15 | No                           | 5.9   | 38.3 | No  | 100.9 | 0   | 0   |                  |
|     | 14/02/15 | Yes (new)                    | 9.2   | 37.2 | Yes | 98.9  | 0   | 0   |                  |
|     | 15/02/15 | No                           | 8.72  | 36.9 | Yes | 98.4  | 0   | 0   |                  |
|     | 16/02/15 | No                           | 9.53  | 37.2 | No  | 98.9  | 0   | 0   |                  |
|     | 17/02/15 | No                           | 8.98  | 37.1 | No  | 98.7  | 0   | 0   |                  |
|     | 18/02/15 | Yes (new)                    | 8.12  | 36.8 | No  | 98.2  | 1+  | 0   |                  |
|     | 19/02/15 | Yes                          | 8.55  | 37.1 | No  | 98.8  | 2+  | 0   |                  |
|     | 20/02/15 | Yes                          | 10.02 | 37.4 | No  | 99.3  | 2+  | 0   |                  |
| 202 | 11/02/15 | Yes (not new or progressive) | 25.44 | 37.8 | Yes | 100.1 | 0   | 0   |                  |
|     | 12/02/15 | Yes (not new or progressive) | 30.6  | 38.4 | N/A | 101.2 | N/A | N/A |                  |
|     | 13/02/15 | N/A                          | N/A   | N/A  | N/A | N/A   | N/A | N/A |                  |
| 203 | 12/06/15 | No                           | 16.17 | 37.1 | Yes | 98.7  | 0   | 0   | 4+ DIPS; 2+ BTSF |
|     | 13/06/15 | Yes (new)                    | 19    | 39.4 | No  | 102.9 | 0   | 0   | 1+ EC            |
| 204 | 13/02/15 | Yes (not new or progressive) | 17.33 | 36.9 | Yes | 98.5  | 0   | 0   |                  |
|     | 14/02/15 | No                           | 15.34 | 37.4 | Yes | 99.3  | 0   | 0   |                  |
|     | 15/02/15 | No                           | 11.3  | 36.9 | N/A | 98.4  | 0   | 0   |                  |
|     | 16/02/15 | No                           | 8.55  | 36.9 | N/A | 98.5  | N/A | N/A |                  |
|     | 17/02/15 | No                           | 10.44 | 37.2 | Yes | 99    | N/A | N/A |                  |
| 205 | 14/02/15 | No                           | 16.73 | 36.4 | N/A | 97.6  | N/A | N/A |                  |
|     | 15/02/15 | No                           | 16.96 | 37.6 | Yes | 99.6  | 0   | 0   |                  |
|     | 16/02/15 | Yes (new)                    | 24.67 | 38.6 | N/A | 101.5 | VAP | 0   |                  |
|     | 17/02/15 | Yes                          | 27.54 | 38.2 | N/A | 100.7 | VAP | N/A |                  |

|          |                              |                              |       |      |      |       |     |                |                |      |
|----------|------------------------------|------------------------------|-------|------|------|-------|-----|----------------|----------------|------|
| 206      | 18/02/15                     | Yes                          | 25.52 | 37.8 | N/A  | 100.1 | N/A | N/A            |                |      |
|          | 16/02/15                     | No                           | 17.72 | 37.9 | No   | 100.2 | N/A | N/A            |                |      |
|          | 17/02/15                     | Yes (new)                    | 17.46 | 37.9 | No   | 100.2 | 0   | 0              |                |      |
|          | 18/02/15                     | Yes                          | 11.17 | 38.2 | No   | 100.7 | VAP | 0              | 0              |      |
|          | 19/02/15                     | Yes                          | 11.41 | 37.4 | No   | 99.3  | 0   | 0              |                |      |
|          | 20/02/15                     | Yes                          | 17.49 | 36.8 | N/A  | 98.2  | 0   | 0              |                |      |
|          | 21/02/15                     | Yes                          | 16.6  | 36.7 | N/A  | 98.1  | N/A | N/A            |                |      |
|          | 22/02/15                     | No                           | 16.29 | 36.9 | N/A  | 98.4  | N/A | N/A            |                |      |
|          | 23/02/15                     | Yes (new)                    | 16.48 | 37.1 | Yes  | 98.7  | VAP | N/A            | N/A            |      |
|          | 17/02/15                     | Yes (not new or progressive) | 11.02 | 37.1 | Yes  | 98.8  | 0   | 0              |                |      |
| 18/02/15 | Yes (not new or progressive) | 11.85                        | 37.7  | No   | 99.8 | 0     | 0   |                |                |      |
| 19/02/15 | Yes (not new or progressive) | 12.93                        | 37.7  | No   | 99.9 | 0     | 0   |                |                |      |
| 20/02/15 | Yes (progressive)            | 14.43                        | 37.4  | No   | 99.4 | 0     | 0   |                |                |      |
| 208      | 18/02/15                     | Yes (not new or progressive) | 15.63 | 37.7 | Yes  | 99.8  | 2+  | 0              |                |      |
|          | 19/02/15                     | No                           | 15.5  | 37.8 | No   | 100   | 0   | 3+ ACCA; 3+ KP |                |      |
|          | 20/02/15                     | Yes (new)                    | 11.03 | 38.1 | Yes  | 100.5 | VAP | 0              | 3+ ACCA; 3+ KP |      |
|          | 21/02/15                     | No                           | 10.29 | 37.9 | N/A  | 100.2 | N/A | N/A            |                |      |
|          | 22/02/15                     | Yes (new)                    | 10.67 | 37.7 | Yes  | 99.9  | N/A | N/A            |                |      |
|          | 23/02/15                     | Yes (progressive)            | 10.75 | 37.1 | N/A  | 98.8  | 0   | 3+ ACCA; 3+ KP |                |      |
|          | 24/02/15                     | Yes                          | 12.42 | 37.6 | N/A  | 99.6  | N/A | N/A            |                |      |
|          | 25/02/15                     | Yes                          | 13.34 | 37.2 | N/A  | 99    | N/A | N/A            |                |      |
|          | 26/02/15                     | Yes                          | 11.34 | N/A  | Yes  | 99    | VAP | N/A            | N/A            |      |
|          | 21/02/15                     | No                           | 37.76 | 37.6 | N/A  | 99.6  | N/A | N/A            |                |      |
| 209      | 22/02/15                     | Yes (new)                    | 16.91 | 38.3 | No   | 100.9 | VAP | N/A            |                |      |
|          | 23/02/15                     | Yes (progressive)            | 13.29 | 37.7 | N/A  | 99.9  | 0   | 0              |                |      |
|          | 24/02/15                     | Yes                          | 11.46 | 37.2 | No   | 98.9  | N/A | N/A            |                |      |
|          | 25/02/15                     | Yes                          | 14.04 | 37.4 | Yes  | 99.3  | VAP | 0              | 0              |      |
|          | 26/02/15                     | No                           | 20.49 | 37.6 | No   | 99.6  | 0   | 0              |                |      |
|          | 27/02/15                     | Yes (new)                    | 17.56 | 37.7 | Yes  | 99.8  | VAP | 0              | 0              |      |
|          | 28/02/15                     | Yes                          | 18.04 | 37.4 | No   | 99.4  | 0   | 0              |                |      |
|          | 01/03/15                     | No                           | 13.48 | 37.4 | Yes  | 99.3  | 0   | 0              |                |      |
|          | 02/03/15                     | Yes (new)                    | 12.7  | 37.7 | N/A  | 99.9  | 0   | 0              |                |      |
|          | 03/03/15                     | N/A                          | 9.71  | 37.1 | No   | 98.8  | N/A | N/A            |                |      |
| 210      | 27/02/15                     | No                           | 9.59  | 38.3 | No   | 101   | 0   | 2+ KOX; 2+ EC  |                |      |
|          | 28/02/15                     | No                           | 10.83 | 39.0 | No   | 102.2 | 2+  | 2+ EC          |                |      |
|          | 01/03/15                     | Yes (new)                    | 21.62 | 38.1 | No   | 100.6 | VAP | 2+             | 0              |      |
|          | 02/03/15                     | Yes                          | 18.41 | 38.1 | No   | 100.6 | VAP | 3+             | 2+ EC; 3+ KOX  | MRSA |
|          | 03/03/15                     | Yes                          | 13.48 | 37.9 | N/A  | 100.3 | 2+  | 1+ EC          |                |      |
|          | 04/03/15                     | Yes                          | 13.64 | 37.7 | N/A  | 99.8  | N/A | N/A            |                |      |
|          | 05/03/15                     | Yes                          | 11.46 | 37.7 | No   | 99.9  | N/A | N/A            |                |      |
|          | 27/02/15                     | No                           | 14.01 | 37.9 | No   | 100.3 | 0   | 1+ KP; 1+ EC   |                |      |
|          | 28/02/15                     | Yes (new)                    | 9.12  | 37.7 | No   | 99.9  | 0   | 0              |                |      |
|          | 01/03/15                     | No                           | 5.59  | 37.7 | Yes  | 99.8  | 0   | 3+ EC          |                |      |
| 211      | 02/03/15                     | Yes (new)                    | 7.25  | 38.2 | Yes  | 100.8 | VAP | 0              | 3+ EC          |      |
|          | 03/03/15                     | Yes                          | 8.94  | 37.2 | N/A  | 98.9  | 0   | 2+ KP; 2+ EC   |                |      |
|          | 04/03/15                     | Yes                          | 10.21 | 38.5 | N/A  | 101.3 | N/A | N/A            |                |      |
|          | 05/03/15                     | Yes                          | 11.86 | 37.2 | No   | 98.9  | N/A | N/A            |                |      |
|          | 27/02/15                     | No                           | 5.21  | 38.4 | Yes  | 101.1 | 0   | 0              |                |      |
|          | 28/02/15                     | No                           | 5.92  | 38.8 | No   | 101.8 | 0   | 0              |                |      |
|          | 01/03/15                     | No                           | 6.18  | 39.6 | Yes  | 103.3 | 0   | 0              |                |      |
|          | 02/03/15                     | Yes (new)                    | 6.62  | 39.3 | No   | 102.7 | 0   | 0              |                |      |
|          | 03/03/15                     | Yes                          | 8.05  | 38.2 | N/A  | 100.8 | 0   | 0              |                |      |
|          | 04/03/15                     | No                           | 9.83  | 38.2 | N/A  | 100.8 | N/A | N/A            |                |      |
| 212      | 05/03/15                     | No                           | N/A   | 37.7 | N/A  | 99.9  | N/A | N/A            |                |      |
|          | 06/03/15                     | No                           | 11.76 | 37.7 | No   | 99.9  | N/A | N/A            |                |      |
|          | 07/03/15                     | Yes (new)                    | 15.9  | 37.6 | No   | 99.6  | 0   | 0              |                |      |
|          | 08/03/15                     | Yes                          | 13.52 | 37.6 | N/A  | 99.7  | 0   | 0              |                |      |
|          | 09/03/15                     | Yes                          | 13.96 | 38.3 | N/A  | 101   | VAP | N/A            | N/A            |      |
|          | 10/03/15                     | No                           | 12.98 | 38.3 | No   | 100.9 | N/A | N/A            |                |      |
|          | 11/03/15                     | No                           | 11.57 | 39.5 | Yes  | 103.1 | 0   | 0              |                |      |
|          | 12/03/15                     | No                           | 12.71 | 38.7 | No   | 101.7 | 0   | 0              |                |      |
|          | 03/03/15                     | No                           | 4.84  | 39.7 | Yes  | 103.4 | 0   | 0              |                |      |
|          | 04/03/15                     | Yes (new)                    | 7.48  | 37.2 | No   | 98.9  | 0   | 0              |                |      |
| 213      | 05/03/15                     | Yes                          | 7.35  | 37.0 | N/A  | 98.6  | 0   | 0              |                |      |
|          | 06/03/15                     | Yes                          | 7.29  | 36.9 | No   | 98.5  | 0   | 0              |                |      |
|          | 07/03/15                     | No                           | 7.46  | 38.2 | N/A  | 100.8 | 0   | 0              |                |      |
|          | 08/03/15                     | No                           | 8.04  | 38.2 | N/A  | 100.7 | N/A | N/A            |                |      |
|          | 09/03/15                     | No                           | 8.76  | 38.3 | Yes  | 101   | N/A | N/A            |                |      |
|          | 10/03/15                     | Yes (new)                    | 9.62  | 38.9 | N/A  | 102   | 0   | 0              |                |      |
|          | 11/03/15                     | N/A                          | N/A   | 37.7 | N/A  | 99.8  | N/A | N/A            |                |      |
|          | 12/03/15                     | N/A                          | N/A   | N/A  | No   | 99.8  | N/A | N/A            |                |      |
|          | 05/03/15                     | Yes (not new or progressive) | 13.14 | 36.6 | Yes  | 97.9  | 0   | 2+ ENTC        |                |      |
|          | 06/03/15                     | Yes (not new or progressive) | 11.88 | 36.2 | N/A  | 97.1  | 0   | 4+ EC          |                |      |
| 214      | 07/03/15                     | No                           | 9.25  | 36.7 | N/A  | 98.1  | 0   | 3+ ENTC        |                |      |
|          | 08/03/15                     | No                           | 10.19 | N/A  | N/A  | N/A   | N/A | N/A            |                |      |
|          | 09/03/15                     | N/A                          | N/A   | N/A  | Yes  | N/A   | N/A | N/A            |                |      |
|          | 09/03/15                     | N/A                          | N/A   | 39.3 | Yes  | 102.8 | N/A | N/A            |                |      |
|          | 10/03/15                     | No                           | 19.35 | 38.8 | N/A  | 101.9 | 0   | 0              |                |      |
|          | 11/03/15                     | No                           | 17.37 | 37.9 | N/A  | 100.3 | N/A | N/A            |                |      |
|          | 12/03/15                     | No                           | 18.29 | 37.9 | N/A  | 100.2 | N/A | N/A            |                |      |
|          | 13/03/15                     | N/A                          | N/A   | 38.2 | Yes  | 100.7 | N/A | N/A            |                |      |
|          | 10/03/15                     | No                           | 14.91 | 37.4 | Yes  | 99.3  | 0   | 0              |                |      |
|          | 11/03/15                     | Yes (new)                    | 11.43 | 37.6 | Yes  | 99.7  | VAP | 0              | 0              |      |
| 215      | 12/03/15                     | N/A                          | 21.83 | 37.4 | Yes  | 99.3  | 0   | 0              |                |      |
|          | 13/03/15                     | Yes                          | 14.17 | 37.7 | N/A  | 99.8  | N/A | N/A            |                |      |
|          | 14/03/15                     | N/A                          | 14.17 | 36.9 | N/A  | 98.5  | N/A | N/A            |                |      |
|          | 10/03/15                     | Yes (not new or progressive) | 27.8  | 37.4 | N/A  | N/A   | N/A | N/A            |                |      |
|          | 11/03/15                     | Yes (not new or progressive) | 35.04 | 37.5 | N/A  | N/A   | N/A | N/A            |                |      |
|          | 12/03/15                     | No                           | 29.23 | 37.6 | Yes  | N/A   | N/A | N/A            |                |      |
|          | 13/03/15                     | No                           | 23.75 | 38.9 | N/A  | 102.1 | N/A | N/A            |                |      |
|          | 14/03/15                     | No                           | 22.65 | 38.9 | N/A  | 102.1 | N/A | N/A            |                |      |
|          | 15/03/15                     | Yes (new)                    | 24.95 | 39.5 | Yes  | 103.1 | VAP | N/A            | N/A            |      |
|          | 16/03/15                     | Yes                          | 23.77 | 37.0 | N/A  | 98.6  | 0   | 0              |                |      |
| 216      | 17/03/15                     | Yes                          | 19.12 | 37.5 | Yes  | N/A   | VAP | N/A            | N/A            |      |
|          | 18/03/15                     | Yes                          | 16.82 | 37.6 | N/A  | 99.7  | 0   | 0              |                |      |
|          | 19/03/15                     | No                           | 12.94 | 37.7 | Yes  | 99.9  | N/A | N/A            |                |      |
|          | 20/03/15                     | No                           | 10.05 | 37.8 | N/A  | 100   | 0   | 0              |                |      |
|          | 21/03/15                     | No                           | 9.91  | 37.1 | N/A  | 98.8  | N/A | N/A            |                |      |
|          | 15/03/15                     | No                           | 15.4  | 38.0 | Yes  | 100.4 | N/A | N/A            |                |      |
|          | 16/03/15                     | Yes (new)                    | 10.09 | 38.4 | Yes  | 101.1 | 0   | 0              |                |      |
|          | 17/03/15                     | Yes                          | 10.14 | 39.1 | N/A  | 102.3 | 0   | 4+ HFLU        |                |      |
|          | 18/03/15                     | Yes                          | 8.03  | 38.3 | Yes  | 100.9 | N/A | N/A            |                |      |
|          | 19/03/15                     | Yes                          | 9.57  | 38.0 | N/A  | 100.4 | N/A | N/A            |                |      |
| 217      | 20/03/15                     | Yes                          | 9.86  | 38.9 | N/A  | 102   | N/A | N/A            |                |      |
|          | 21/03/15                     | Yes                          | 12    | 38.0 | N/A  | 100.4 | N/A | N/A            |                |      |
|          | 22/03/15                     | Yes                          | 13.83 | 38.6 | N/A  | 101.5 | N/A | N/A            |                |      |
|          | 23/03/15                     | Yes                          | 13    | 37.7 | Yes  | 99.9  | N/A | N/A            |                |      |
|          | 24/03/15                     | Yes                          | 14.5  | 37.2 | N/A  | 98.9  | N/A | N/A            |                |      |
|          | 25/03/15                     | Yes                          | 12.3  | 37.7 | N/A  | 99.8  | N/A | N/A            |                |      |
|          | 15/03/15                     | No                           | 26.22 | 39.2 | No   | 102.6 | N/A | N/A            |                |      |
|          | 16/03/15                     | No                           | 20.9  | 39.5 | No   | 0     | 0   | 0              |                |      |
|          | 17/03/15                     | No                           | 11.91 | 37.7 | No   | 0     | 0   | 0              |                |      |
|          | 18/03/15                     | No                           | 10.4  | 37.7 | N/A  | 99.8  | 0   | 0              |                |      |

|     |          |                              |       |      |     |       |     |                |       |
|-----|----------|------------------------------|-------|------|-----|-------|-----|----------------|-------|
|     | 19/03/15 | Yes (new)                    | 7.51  | 38.0 | No  | 100.4 | N/A | N/A            |       |
|     | 20/03/15 | Yes (progressive)            | 8.86  | 38.4 | No  | 101.2 | 0   | 0              |       |
|     | 21/03/15 | Yes                          | 9.51  | 38.7 | Yes | 101.6 | VAP | 0              |       |
|     | 22/03/15 | Yes                          | 8.85  | 37.4 | N/A | 99.3  | 0   | 0              |       |
|     | 23/03/15 | Yes                          | 7.26  | 37.8 | No  | 100   | N/A | N/A            |       |
|     | 24/03/15 | Yes                          | 5.54  | 37.2 | No  | 99    | 0   | 0              |       |
|     | 25/03/15 | Yes                          | 5.66  | 37.3 | No  | 99.1  | 0   | 0              |       |
|     | 26/03/15 | No                           | 6.41  | 37.7 | N/A | 99.8  | 0   | 0              |       |
|     | 27/03/15 | No                           | 5.25  | 37.3 | N/A | 99.1  | N/A | N/A            |       |
|     | 28/03/15 | No                           | 6.01  | 37.2 | N/A | 98.9  | N/A | N/A            |       |
| 220 | 14/06/15 | No                           | 13.97 | 37.7 | No  | 99.9  | N/A | N/A            |       |
|     | 15/06/15 | Yes (new)                    | 17    | 37.7 | No  | 99.8  | 0   | 0              |       |
|     | 16/06/15 | Yes                          | 13.96 | 37.3 | No  | 99.2  | 0   | 0              |       |
|     | 17/06/15 | Yes                          | 14.05 | 37.8 | No  | 100.1 | 0   | 0              |       |
|     | 18/06/15 | Yes                          | 12.99 | 37.5 | No  | 99.5  | 0   | 4+ KP          |       |
|     | 19/06/15 | No                           | 10.72 | 37.1 | Yes | 98.7  | 0   | 0              |       |
| 221 | 18/03/15 | Yes (not new or progressive) | 15.17 | 38.0 | Yes | 100.4 | 0   | 0              |       |
|     | 19/03/15 | Yes (not new or progressive) | 11.02 | 38.3 | Yes | 101   | 0   | 0              |       |
|     | 20/03/15 | Yes (not new or progressive) | 6.33  | 38.5 | Yes | 101.3 | 0   | 2+ EC          |       |
|     | 21/03/15 | Yes (not new or progressive) | 6.33  | 38.6 | Yes | 101.4 | 0   | 3+ EC          |       |
|     | 22/03/15 | Yes (progressive)            | 8.17  | 38.5 | Yes | 101.3 | VAP | 0              | 3+ EC |
|     | 23/03/15 | Yes                          | 5.39  | 38.4 | Yes | 101.2 | VAP | 0              | 4+ EC |
|     | 24/03/15 | Yes                          | 8.02  | 38.9 | N/A | 102.1 | N/A | N/A            |       |
|     | 25/03/15 | Yes                          | 8.05  | 37.9 | Yes | 100.3 | N/A | N/A            |       |
|     | 26/03/15 | No                           | 8.25  | 37.3 | N/A | 99.1  | 2+  | 2+ EC          |       |
|     | 27/03/15 | No                           | 7.76  | 37.8 | N/A | 100   | 3+  | 3+ EC          |       |
|     | 28/03/15 | Yes (new)                    | 7.41  | 37.3 | N/A | 99.1  | N/A | N/A            |       |
|     | 29/03/15 | Yes                          | 7.85  | 38.1 | N/A | 100.5 | N/A | N/A            |       |
|     | 30/03/15 | Yes                          | 12.95 | 37.1 | N/A | 98.7  | N/A | N/A            |       |
| 222 | 19/03/15 | Yes (not new or progressive) | 15.72 | 38.1 | No  | 100.6 | N/A | N/A            |       |
|     | 20/03/15 | Yes (not new or progressive) | 21.98 | 37.5 | No  | 99.2  | 0   | 0              |       |
|     | 21/03/15 | Yes (progressive)            | 22    | 37.4 | No  | 99.4  | 0   | 0              |       |
|     | 22/03/15 | Yes                          | 28.53 | 37.3 | N/A | 99.1  | 0   | 0              |       |
|     | 23/03/15 | Yes                          | 31.17 | 37.2 | No  | 98.9  | N/A | N/A            |       |
|     | 24/03/15 | No                           | 28.48 | 37.3 | Yes | 99.1  | 0   | 0              |       |
|     | 25/03/15 | Yes (new)                    | 32.8  | 37.6 | No  | 99.7  | 0   | 0              |       |
|     | 26/03/15 | Yes                          | 25.08 | 37.4 | N/A | 99.4  | 0   | 0              |       |
|     | 27/03/15 | Yes                          | 18.83 | 37.1 | N/A | 98.8  | N/A | N/A            |       |
|     | 28/03/15 | Yes                          | 14.87 | 37.3 | N/A | 99.2  | N/A | N/A            |       |
|     | 29/03/15 | Yes (progressive)            | 14.76 | 36.7 | N/A | 98    | N/A | N/A            |       |
| 223 | 21/03/15 | Yes (not new or progressive) | 24.44 | 37.7 | Yes | 99.9  | N/A | N/A            |       |
|     | 22/03/15 | Yes (not new or progressive) | 7.3   | 37.8 | No  | 100   | 3+  | 0              |       |
|     | 23/03/15 | Yes (progressive)            | 6.89  | 37.7 | N/A | 99.8  | 2+  | 0              |       |
|     | 24/03/15 | No                           | 5.6   | 37.2 | N/A | 99    | N/A | N/A            |       |
| 224 | 22/03/15 | Yes (not new or progressive) | 14.81 | 38.8 | No  | 101.9 | N/A | N/A            |       |
|     | 23/03/15 | Yes (not new or progressive) | 14.63 | 38.1 | No  | 100.5 | 2+  | 2+ S. rubidaea |       |
|     | 24/03/15 | Yes (progressive)            | 4.22  | 37.1 | N/A | 98.7  | 2+  | 2+ S. rubidaea |       |
|     | 25/03/15 | Yes                          | 19.65 | 36.7 | N/A | 98    | N/A | N/A            |       |
|     | 26/03/15 | Yes                          | 14.03 | 37.0 | N/A | 98.6  | N/A | N/A            |       |
|     | 27/03/15 | N/A                          | N/A   | N/A  | N/A | N/A   | N/A | N/A            |       |
| 225 | 22/03/15 | Yes (not new or progressive) | 20.3  | 39.1 | Yes | 102.3 | N/A | N/A            |       |
|     | 23/03/15 | Yes (not new or progressive) | 11.79 | 37.5 | No  | 99.5  | 0   | 0              |       |
|     | 24/03/15 | Yes (not new or progressive) | 10.58 | 37.2 | Yes | 98.9  | 2+  | 0              |       |
|     | 25/03/15 | Yes (not new or progressive) | 7.33  | 37.0 | N/A | 98.6  | 0   | 0              |       |
|     | 26/03/15 | Yes (not new or progressive) | 7.49  | 37.1 | Yes | 98.7  | N/A | N/A            |       |
|     | 27/03/15 | No                           | 8.73  | 37.1 | N/A | 98.7  | 3+  | 0              |       |
|     | 28/03/15 | Yes (new)                    | 16.18 | 37.6 | N/A | 99.6  | N/A | N/A            |       |
|     | 29/03/15 | Yes                          | 17.91 | 37.6 | N/A | 99.6  | N/A | N/A            |       |
|     | 30/03/15 | Yes                          | 18.06 | 37.4 | N/A | 99.4  | N/A | N/A            |       |
|     | 31/03/15 | Yes                          | 18.11 | 39.0 | N/A | 102.2 | VAP | N/A            |       |
|     | 01/04/15 | Yes                          | 17.34 | 39.4 | N/A | 102.9 | VAP | N/A            |       |
|     | 02/04/15 | Yes                          | 13.09 | 39.3 | N/A | 102.8 | VAP | 4+             | 0     |
|     | 03/04/15 | Yes                          | 10.85 | 39.6 | N/A | 103.2 | 3+  | 0              |       |
|     | 04/04/15 | Yes                          | 8.73  | 39.6 | N/A | 103.3 | N/A | N/A            |       |
|     | 05/04/15 | Yes                          | 8.22  | 39.4 | Yes | 103   | VAP | N/A            |       |
|     | 06/04/15 | Yes                          | 10.46 | 39.4 | No  | 102.9 | 2+  | 0              |       |
|     | 07/04/15 | N/A                          | 7.82  | 37.4 | N/A | 99.3  | 0   | 0              |       |
|     | 08/04/15 | N/A                          | 3.18  | 38.3 | Yes | 100.9 | N/A | N/A            |       |
| 226 | 26/03/15 | Yes (not new or progressive) | 2.26  | 39.4 | Yes | 103   | N/A | N/A            |       |
|     | 27/03/15 | Yes (not new or progressive) | 13.79 | 38.6 | N/A | 101.5 | 0   | 0              |       |
|     | 28/03/15 | Yes (not new or progressive) | 14.01 | 38.2 | N/A | 100.8 | N/A | N/A            |       |
| 227 | 16/06/15 | No                           | 7.79  | 38.9 | No  | 102.1 | N/A | N/A            |       |
|     | 17/06/15 | No                           | 7.06  | 38.0 | No  | 100.4 | 0   | 2+ KP          |       |
|     | 18/06/15 | No                           | 6.28  | 37.5 | N/A | 99.5  | N/A | N/A            |       |
|     | 19/06/15 | No                           | 3.96  | 37.2 | Yes | 98.9  | N/A | N/A            |       |
| 228 | 26/03/15 | N/A                          | 4.66  | N/A  | N/A | N/A   | N/A | N/A            |       |
|     | 27/03/15 | N/A                          | 6.42  | N/A  | N/A | N/A   | N/A | N/A            |       |
|     | 28/03/15 | Yes (not new or progressive) | 6.07  | 38.7 | N/A | 101.6 | N/A | N/A            |       |
|     | 29/03/15 | Yes (not new or progressive) | 6     | 37.9 | N/A | 100.3 | N/A | N/A            |       |
|     | 30/03/15 | Yes (not new or progressive) | 7.58  | 38.3 | N/A | 101   | N/A | N/A            |       |
|     | 31/03/15 | Yes (not new or progressive) | 6.29  | 38.3 | N/A | 100.9 | N/A | N/A            |       |
|     | 01/04/15 | Yes (not new or progressive) | 5.92  | 37.9 | N/A | 100.2 | N/A | N/A            |       |
|     | 02/04/15 | Yes (not new or progressive) | 5.37  | 37.8 | N/A | 100   | 0   | 0              |       |
|     | 03/04/15 | N/A                          | 6.4   | 38.2 | N/A | 100.8 | 0   | 0              |       |
|     | 04/04/15 | Yes (not new or progressive) | 8.67  | 37.8 | N/A | 100   | N/A | N/A            |       |
|     | 05/04/15 | N/A                          | N/A   | 37.4 | Yes | 99.4  | N/A | N/A            |       |
|     | 06/04/15 | Yes (not new or progressive) | 6.61  | 37.7 | Yes | 99.9  | 0   | 0              |       |
|     | 07/04/15 | N/A                          | N/A   | 38.1 | Yes | 100.5 | 0   | 0              |       |
| 229 | 06/04/15 | Yes (not new or progressive) | 20.77 | 37.2 | No  | 99    | 0   | 2+ Mold        | Yeast |
|     | 07/04/15 | Yes (not new or progressive) | 28.48 | 36.7 | N/A | 98.1  | 0   | 2+ Mold        |       |
|     | 08/04/15 | N/A                          | N/A   | N/A  | N/A | N/A   | N/A | N/A            |       |
|     | 09/04/15 | N/A                          | N/A   | N/A  | No  | N/A   | N/A | N/A            |       |
| 230 | 06/04/15 | Yes (not new or progressive) | 29.4  | 37.2 | N/A | 98.9  | 0   | 0              |       |
|     | 07/04/15 | Yes (not new or progressive) | 30.59 | 37.3 | N/A | 99.2  | N/A | N/A            |       |
|     | 08/04/15 | Yes (not new or progressive) | 35.75 | 37.0 | N/A | 98.6  | N/A | N/A            |       |
|     | 09/04/15 | Yes (not new or progressive) | 40.28 | 37.1 | N/A | 98.7  | N/A | N/A            |       |
|     | 10/04/15 | Yes (not new or progressive) | 35.87 | 37.3 | Yes | 99.1  | N/A | N/A            |       |
|     | 11/04/15 | Yes (not new or progressive) | 35.42 | 37.8 | N/A | 100   | 0   | 0              |       |
|     | 12/04/15 | Yes (not new or progressive) | 49.46 | 37.7 | N/A | 99.9  | N/A | N/A            |       |
|     | 13/04/15 | Yes (not new or progressive) | 51.18 | 37.3 | No  | 99.2  | N/A | N/A            |       |
|     | 14/04/15 | Yes (not new or progressive) | 55.44 | 37.3 | N/A | 99.2  | 1+  | 0              |       |
|     | 15/04/15 | Yes (not new or progressive) | 46.55 | 37.2 | N/A | 99    | N/A | N/A            |       |
|     | 16/04/15 | N/A                          | 51.14 | 37.1 | N/A | 98.7  | N/A | N/A            |       |
| 231 | 06/04/15 | No                           | 25.33 | 39.4 | N/A | 103   | N/A | N/A            |       |
|     | 07/04/15 | No                           | 21.13 | 39.6 | N/A | 103.3 | N/A | N/A            |       |
|     | 08/04/15 | Yes (new)                    | 29.02 | 37.0 | N/A | 98.6  | N/A | N/A            |       |
|     | 09/04/15 | N/A                          | N/A   | N/A  | N/A | N/A   | N/A | N/A            |       |
| 232 | 08/04/15 | No                           | 20.75 | 37.8 | Yes | 100   | N/A | N/A            |       |
|     | 09/04/15 | No                           | 26.75 | 37.7 | N/A | 99.9  | 0   | 4+ MCAT        |       |
|     | 10/04/15 | No                           | 21.4  | 37.5 | Yes | 99.5  | N/A | N/A            |       |
|     | 11/04/15 | Yes (new)                    | 16.16 | 37.2 | Yes | 99    | VAP | 0              | 0     |
|     | 12/04/15 | Yes                          | 23.31 | 37.3 | No  | 99.1  | 0   | 0              |       |
|     | 13/04/15 | Yes                          | 40.02 | 37.2 | Yes | 99    | VAP | 0              | 0     |



|     |          |                              |       |      |     |       |     |                |      |
|-----|----------|------------------------------|-------|------|-----|-------|-----|----------------|------|
|     | 14/04/15 | Yes                          | 45.49 | 37.3 | N/A | 99.1  | 0   | 0              |      |
|     | 15/04/15 | Yes                          | 41.13 | 37.8 | N/A | 100.1 | 0   | 0              |      |
|     | 16/04/15 | Yes                          | 34.97 | 37.9 | Yes | 100.2 | VAP | N/A            | N/A  |
|     | 17/04/15 | No                           | 36.98 | 37.1 | N/A | 98.7  | N/A | N/A            |      |
|     | 18/04/15 | No                           | 35.46 | 37.4 | No  | 99.4  | 0   | 0              |      |
|     | 19/04/15 | No                           | 30.53 | 38.2 | N/A | 100.8 | 0   | 0              |      |
|     | 20/04/15 | No                           | 25.12 | 37.4 | N/A | 99.3  | N/A | N/A            |      |
|     | 21/04/15 | No                           | 23.43 | 37.9 | N/A | 100.2 | N/A | N/A            |      |
|     | 22/04/15 | No                           | 20.67 | 37.9 | Yes | 100.2 | N/A | N/A            |      |
|     | 23/04/15 | Yes (new)                    | 18.8  | 37.1 | No  | 98.7  | 0   | 0              |      |
|     | 24/04/15 | Yes                          | 18.38 | 37.3 | N/A | 99.1  | 0   | 0              |      |
|     | 25/04/15 | N/A                          | 19    | 37.3 | N/A | 99.1  | N/A | N/A            |      |
| 233 | 08/04/15 | Yes (not new or progressive) | 4.77  | 36.9 | Yes | 98.4  | N/A | N/A            |      |
|     | 09/04/15 | Yes (not new or progressive) | 3.04  | 37.2 | Yes | 99    | 0   | 0              |      |
|     | 10/04/15 | Yes (not new or progressive) | 3.66  | 37.2 | No  | 98.9  | 0   | 0              |      |
|     | 11/04/15 | No                           | 3.98  | 37.8 | Yes | 100   | 1+  | 0              |      |
|     | 12/04/15 | Yes (new)                    | 6.05  | 38.0 | Yes | 100.4 | 2+  | 0              |      |
|     | 13/04/15 | Yes                          | 5.11  | 37.2 | Yes | 99    | 4+  | 0              |      |
|     | 14/04/15 | Yes                          | 7.16  | 37.2 | Yes | 98.9  | 4+  | 0              | SAUR |
|     | 15/04/15 | Yes                          | 6.98  | 37.6 | N/A | 99.7  | 3+  | 0              |      |
|     | 16/04/15 | No                           | 6.49  | 37.3 | Yes | 99.2  | N/A | N/A            |      |
| 234 | 10/04/15 | Yes (not new or progressive) | 24.72 | 37.3 | Yes | 99.2  | N/A | N/A            |      |
|     | 11/04/15 | Yes (not new or progressive) | 18.99 | 36.7 | N/A | 98    | 0   | 0              |      |
|     | 12/04/15 | Yes (not new or progressive) | 24.53 | 36.7 | N/A | 98    | N/A | N/A            |      |
|     | 13/04/15 | Yes (not new or progressive) | 19.32 | 37.6 | Yes | 99.7  | N/A | N/A            |      |
|     | 14/04/15 | Yes (not new or progressive) | 13.58 | 37.5 | Yes | 99.5  | 0   | 0              |      |
|     | 15/04/15 | No                           | 17.29 | 37.4 | N/A | 99.3  | 0   | 0              |      |
|     | 16/04/15 | Yes (new)                    | 31.05 | 36.7 | N/A | 98.1  | N/A | N/A            |      |
|     | 17/04/15 | N/A                          | N/A   | N/A  | Yes | N/A   | N/A | N/A            |      |
| 235 | 12/04/15 | No                           | 12.12 | 37.9 | No  | 100.3 | 1+  | 0              |      |
|     | 13/04/15 | No                           | 10.53 | 37.7 | N/A | 99.9  | 1+  | 0              |      |
|     | 14/04/15 | N/A                          | 12.13 | 37.3 | Yes | 99.1  | N/A | N/A            |      |
| 236 | 14/04/15 | No                           | 41.79 | 37.5 | N/A | 99.5  | 1+  | 0              |      |
|     | 15/04/15 | Yes (new)                    | 20.65 | 37.5 | Yes | 99.5  | 0   | 0              |      |
|     | 16/04/15 | Yes                          | 14.55 | 37.2 | N/A | 98.9  | N/A | N/A            |      |
|     | 17/04/15 | Yes                          | 15.65 | 36.8 | Yes | 98.2  | N/A | N/A            |      |
| 237 | 15/04/15 | No                           | 6.63  | 36.6 | N/A | 97.8  | 0   | 0              |      |
|     | 16/04/15 | No                           | 6.6   | 36.6 | N/A | 97.9  | N/A | N/A            |      |
|     | 17/04/15 | No                           | 8.28  | 37.1 | N/A | 98.7  | N/A | N/A            |      |
|     | 18/04/15 | Yes (new)                    | 5.88  | 36.8 | N/A | 98.2  | N/A | N/A            |      |
|     | 19/04/15 | Yes                          | 5.88  | 37.0 | N/A | 98.6  | N/A | N/A            |      |
|     | 20/04/15 | Yes                          | 7.28  | 38.0 | N/A | 100.4 | N/A | N/A            |      |
|     | 21/04/15 | Yes                          | 8.28  | 37.6 | Yes | 99.6  | N/A | N/A            |      |
|     | 22/04/15 | No                           | N/A   | 37.9 | N/A | 100.3 | 0   | 4+ EC; 2+ PMIR |      |
|     | 23/04/15 | No                           | 8.4   | 37.8 | N/A | 100   | N/A | N/A            |      |
|     | 24/04/15 | Yes (new)                    | 9.43  | 37.9 | N/A | 100.2 | N/A | N/A            |      |
|     | 25/04/15 | Yes                          | 11.03 | 38.4 | N/A | 101.2 | VAP | N/A            |      |
| 238 | 15/04/15 | Yes (not new or progressive) | 7.79  | 37.9 | N/A | 100.2 | N/A | N/A            |      |
|     | 16/04/15 | Yes (not new or progressive) | 6.04  | 37.4 | N/A | 99.4  | N/A | N/A            |      |
|     | 17/04/15 | Yes (not new or progressive) | 4.96  | 37.5 | N/A | 99.5  | N/A | N/A            |      |
|     | 18/04/15 | Yes (not new or progressive) | 4.38  | 37.7 | Yes | 99.9  | N/A | N/A            |      |
|     | 19/04/15 | No                           | 6.17  | 37.4 | N/A | 99.3  | 3+  | 0              |      |
|     | 20/04/15 | No                           | 9.85  | 37.6 | N/A | 99.6  | N/A | N/A            |      |
|     | 21/04/15 | No                           | 8.61  | 37.0 | N/A | 98.6  | N/A | N/A            |      |
|     | 22/04/15 | Yes (new)                    | 6.31  | 37.9 | N/A | 100.2 | N/A | N/A            |      |
|     | 23/04/15 | Yes                          | 7.38  | 36.8 | N/A | 98.2  | N/A | N/A            |      |
|     | 24/04/15 | No                           | 5.47  | 36.6 | Yes | 97.9  | N/A | N/A            |      |
|     | 25/04/15 | No                           | 6.87  | 38.8 | N/A | 101.8 | N/A | N/A            |      |
|     | 26/04/15 | Yes (new)                    | 15.8  | 39.1 | N/A | 102.4 | N/A | N/A            |      |
|     | 27/04/15 | Yes                          | 9.67  | 37.3 | Yes | 99.1  | N/A | N/A            |      |
|     | 28/04/15 | No                           | 6.47  | 36.9 | No  | 98.4  | 1+  | 0              |      |
|     | 29/04/15 | Yes (new)                    | 7.67  | 37.1 | Yes | 98.8  | 2+  | 2+ XMAL        |      |
|     | 30/04/15 | No                           | 9.88  | 36.7 | Yes | 98    | 3+  | 3+ XMAL        |      |
|     | 01/05/15 | No                           | 13.02 | 36.7 | N/A | 98.1  | 0   | 3+ XMAL        |      |
|     | 02/05/15 | No                           | 26.11 | 37.4 | N/A | 99.4  | N/A | N/A            |      |
|     | 03/05/15 | N/A                          | N/A   | N/A  | Yes | N/A   | N/A | N/A            |      |
| 239 | 16/04/15 | No                           | 13.43 | 32.6 | N/A | 90.7  | N/A | N/A            |      |
|     | 17/04/15 | No                           | 11.83 | 32.8 | N/A | 91    | N/A | N/A            |      |
|     | 18/04/15 | Yes (new)                    | 9.5   | 37.7 | N/A | 99.8  | N/A | N/A            |      |
|     | 19/04/15 | Yes                          | 11.27 | 37.8 | N/A | 100   | N/A | N/A            |      |
|     | 20/04/15 | Yes                          | 10.94 | 37.9 | N/A | 100.2 | N/A | N/A            |      |
|     | 21/04/15 | Yes                          | 12.02 | 37.8 | Yes | 100   | VAP | N/A            |      |
|     | 22/04/15 | No                           | 9.57  | 37.4 | N/A | 99.3  | 0   | 0              |      |
|     | 23/04/15 | Yes (new)                    | 10.59 | 37.5 | No  | 99.5  | N/A | N/A            |      |
|     | 24/04/15 | N/A                          | 11.05 | 37.4 | N/A | 99.3  | 0   | 0              |      |
|     | 25/04/15 | No                           | 12.69 | 38.2 | N/A | 100.8 | N/A | N/A            |      |
|     | 26/04/15 | N/A                          | 14.21 | 38.2 | N/A | 100.8 | N/A | N/A            |      |
|     | 27/04/15 | N/A                          | N/A   | 37.9 | N/A | 100.3 | N/A | N/A            |      |
|     | 28/04/15 | N/A                          | N/A   | 37.9 | N/A | 100.2 | N/A | N/A            |      |
|     | 29/04/15 | N/A                          | N/A   | 38.4 | N/A | 101.1 | N/A | N/A            |      |
|     | 30/04/15 | N/A                          | N/A   | N/A  | N/A | N/A   | N/A | N/A            |      |
| 240 | 16/04/15 | No                           | 7.97  | 38.7 | N/A | 101.7 | N/A | N/A            |      |
|     | 17/04/15 | No                           | N/A   | 38.4 | N/A | 101.1 | N/A | N/A            |      |
|     | 18/04/15 | Yes (new)                    | 9.07  | 37.9 | N/A | 100.2 | N/A | N/A            |      |
| 241 | 16/04/15 | Yes (not new or progressive) | 21.5  | 38.1 | N/A | 100.5 | N/A | N/A            |      |
|     | 17/04/15 | Yes (progressive)            | 14.08 | 37.9 | N/A | 100.3 | N/A | N/A            |      |
|     | 18/04/15 | Yes                          | 11.04 | 37.5 | N/A | 99.5  | N/A | N/A            |      |
| 242 | 13/05/15 | N/A                          | 21.29 | 38.9 | Yes | 102.1 | N/A | N/A            |      |
|     | 14/05/15 | Yes (not new or progressive) | 18.92 | 38.9 | No  | 102.1 | 0   | 0              |      |
|     | 15/05/15 | Yes                          | 15.96 | 38.1 | No  | 100.5 | 0   | 0              |      |
|     | 16/05/15 | Yes                          | 13.98 | 37.6 | No  | 99.7  | 0   | 0              |      |
|     | 17/05/15 | Yes                          | 15.34 | 37.2 | Yes | 99    | 1+  | 0              |      |
|     | 18/05/15 | Yes                          | 14.85 | 37.3 | N/A | 99.2  | 3+  | 0              |      |
|     | 19/05/15 | No                           | 14.21 | 36.9 | N/A | 98.4  | N/A | N/A            |      |
| 243 | 14/05/15 | No                           | 21.13 | 39.2 | No  | 102.5 | N/A | N/A            |      |
|     | 15/05/15 | No                           | 24.35 | 36.8 | N/A | 98.2  | 2+  | 0              |      |
|     | 16/05/15 | N/A                          | N/A   | N/A  | Yes | N/A   | N/A | N/A            |      |
| 244 | 18/04/15 | N/A                          | 48.96 | 39.1 | Yes | 102.3 | 0   | 0              |      |
|     | 19/04/15 | N/A                          | 57.79 | 38.1 | N/A | 100.5 | 0   | 0              |      |
|     | 20/04/15 | No                           | 51.75 | 38.2 | Yes | 100.7 | N/A | N/A            |      |
|     | 21/04/15 | Yes (new)                    | 47.72 | 38.7 | N/A | 101.6 | VAP | N/A            |      |
|     | 22/04/15 | Yes                          | 50.56 | 38.4 | N/A | 101.2 | VAP | N/A            |      |
|     | 23/04/15 | Yes (progressive)            | 45.75 | 38.9 | N/A | 102.1 | VAP | N/A            |      |
|     | 24/04/15 | Yes                          | 80.2  | 39.5 | N/A | 103.1 | VAP | N/A            |      |
|     | 25/04/15 | N/A                          | N/A   | N/A  | N/A | N/A   | N/A | N/A            |      |
| 245 | 20/04/15 | No                           | 13.25 | 37.9 | N/A | 100.3 | N/A | N/A            |      |
|     | 21/04/15 | No                           | 13.59 | 37.5 | Yes | 99.5  | N/A | N/A            |      |
|     | 22/04/15 | Yes (new)                    | 8.04  | 37.2 | N/A | 98.9  | 0   | 0              |      |
|     | 23/04/15 | Yes (progressive)            | 7.39  | 37.3 | No  | 99.2  | N/A | N/A            |      |
|     | 24/04/15 | Yes                          | 7.22  | 37.5 | N/A | 99.5  | 0   | 0              |      |
|     | 25/04/15 | Yes                          | 9.49  | 37.4 | N/A | 99.3  | N/A | N/A            |      |
| 246 | 23/04/15 | Yes (not new or progressive) | 11.84 | 39.9 | N/A | 103.8 | N/A | N/A            |      |
|     | 24/04/15 | Yes (not new or progressive) | 14.32 | 37.3 | N/A | 99.1  | N/A | N/A            |      |

|     |          |                              |       |      |     |       |     |         |         |
|-----|----------|------------------------------|-------|------|-----|-------|-----|---------|---------|
|     | 25/04/15 | No                           | 15.11 | 37.0 | N/A | 98.6  | N/A | N/A     |         |
|     | 26/04/15 | No                           | 20.64 | 36.7 | No  | 98.1  | N/A | N/A     |         |
|     | 27/04/15 | No                           | 21.35 | 36.9 | Yes | 98.5  | 0   | 0       |         |
|     | 28/04/15 | No                           | 17.09 | 40.0 | No  | 104   | 0   | 0       |         |
|     | 29/04/15 | Yes (new)                    | 14.1  | 40.0 | Yes | 104   | VAP | 0       | 0       |
|     | 30/04/15 | Yes                          | 15.36 | 39.2 | Yes | 102.5 | VAP | 0       | 0       |
|     | 01/05/15 | Yes                          | 14.65 | 37.4 | Yes | 99.4  | VAP | 0       | 0       |
|     | 02/05/15 | Yes                          | 18.32 | 37.1 | N/A | 98.8  | 0   | 0       |         |
|     | 03/05/15 | No                           | 23.17 | 36.9 | N/A | 98.4  | N/A | N/A     |         |
|     | 04/05/15 | Yes (new)                    | 26.27 | 37.8 | Yes | 100   | VAP | N/A     | N/A     |
|     | 05/05/15 | Yes                          | 18.13 | 37.4 | Yes | 99.4  | VAP | 0       | 0       |
|     | 06/05/15 | No                           | 13.62 | 37.2 | N/A | 98.9  | 0   | 0       |         |
|     | 07/05/15 | Yes (new)                    | 13.45 | 37.3 | N/A | 99.1  | N/A | N/A     |         |
|     | 08/05/15 | No                           | 13.58 | 37.4 | Yes | 99.4  | N/A | N/A     |         |
| 247 | 29/04/15 | Yes (not new or progressive) | 12.4  | 37.3 | Yes | 99.1  | 3+  | 0       |         |
|     | 30/04/15 | Yes (not new or progressive) | 10.87 | 37.6 | N/A | 99.6  | 2+  | 0       |         |
|     | 01/05/15 | Yes (not new or progressive) | 11.23 | 37.1 | Yes | 98.7  | N/A | N/A     |         |
| 248 | 29/04/15 | No                           | 29.91 | 37.1 | Yes | 98.8  | 0   | 0       |         |
|     | 30/04/15 | Yes (new)                    | 28.46 | 37.2 | N/A | 99    | 0   | 0       |         |
|     | 01/05/15 | N/A                          | 37.61 | 36.8 | N/A | 98.3  | N/A | N/A     |         |
| 249 | 07/05/15 | Yes (not new or progressive) | 16.17 | 37.6 | Yes | 99.7  | N/A | N/A     |         |
|     | 08/05/15 | Yes (not new or progressive) | 15.49 | 37.5 | No  | 99.5  | 0   | 0       |         |
|     | 09/05/15 | No                           | 7.26  | 37.4 | No  | 99.4  | 0   | 0       |         |
|     | 10/05/15 | Yes (new)                    | 6.27  | 37.3 | Yes | 99.2  | 0   | 0       |         |
|     | 11/05/15 | Yes                          | 6.79  | 37.5 | Yes | 99.5  | 0   | 0       |         |
|     | 12/05/15 | Yes                          | 6.94  | 38.6 | Yes | 101.4 | VAP | 0       | 0       |
|     | 13/05/15 | Yes                          | 11.06 | 37.4 | Yes | 99.4  | VAP | 0       | 0       |
|     | 14/05/15 | Yes                          | 11.19 | 37.4 | N/A | 99.4  | 0   | 0       |         |
|     | 15/05/15 | Yes (progressive)            | 10.85 | 37.1 | Yes | 98.8  | N/A | N/A     |         |
| 250 | 08/05/15 | Yes (not new or progressive) | 12.84 | 37.6 | Yes | 99.7  | N/A | N/A     |         |
|     | 09/05/15 | Yes (not new or progressive) | 10.29 | 37.2 | Yes | 99    | 0   | 0       |         |
|     | 10/05/15 | Yes (not new or progressive) | 8.62  | 37.7 | No  | 99.8  | 0   | 0       |         |
|     | 11/05/15 | Yes (not new or progressive) | 9.17  | 38.2 | No  | 100.7 | 0   | 2+ XMAL |         |
|     | 12/05/15 | No                           | 9.18  | 38.8 | Yes | 101.9 | 0   | 2+ XMAL |         |
|     | 13/05/15 | Yes (new)                    | 10.96 | 37.7 | Yes | 99.9  | 0   | 3+ XMAL |         |
|     | 14/05/15 | Yes                          | 10.81 | 38.4 | Yes | 101.2 | VAP | 0       | 3+ XMAL |
|     | 15/05/15 | Yes                          | 11.44 | 38.1 | No  | 100.6 | VAP | 0       | 3+ XMAL |
|     | 16/05/15 | Yes                          | 10.46 | 38.1 | No  | 100.6 | 0   | 2+ XMAL |         |
|     | 17/05/15 | Yes                          | 8.6   | 37.8 | Yes | 100.1 | 0   | 4+ XMAL |         |
|     | 18/05/15 | Yes (progressive)            | 9.29  | 38.0 | Yes | 100.4 | 0   | 3+ XMAL |         |
|     | 19/05/15 | Yes                          | 9.18  | 37.6 | Yes | 99.6  | 0   | 3+ XMAL |         |
|     | 20/05/15 | Yes                          | 9.71  | 37.9 | Yes | 100.2 | 0   | 4+ XMAL |         |
|     | 21/05/15 | N/A                          | 9.38  | 37.4 | Yes | 99.4  | 0   | 4+ XMAL |         |
|     | 22/05/15 | Yes                          | 8.31  | 37.6 | Yes | 99.7  | 3+  | 3+ XMAL |         |
|     | 23/05/15 | N/A                          | 9.46  | 37.6 | N/A | 99.6  | 3+  | 2+ XMAL |         |
|     | 24/05/15 | N/A                          | 9.84  | 37.7 | N/A | 99.9  | N/A | N/A     |         |
