# Supplementary material for: The utility of endotracheal aspirate bacteriology in identifying mechanically ventilated patients at risk for ventilator associated pneumonia: a single-center prospective observational study
Source: Springer Nature journal article supplement (doi:10.1186/s12879-019-4367-7), 2019-08-29
Supplement: MOESM9 [file 17117016]

| ETA Isolate |                         |
|-------------|-------------------------|
| study ID    | Restistance MRSA / MSSA |
| 002         | MSSA                    |
| 003         | MSSA                    |
| 014         | MRSA                    |
| 014         | MRSA                    |
| 014         | MRSA                    |
| 014         | MRSA                    |
| 021         | MSSA                    |
| 022         | MRSA                    |
| 022         | MRSA                    |
| 022         | MRSA                    |
| 022         | MRSA                    |
| 022         | MRSA                    |
| 023         | MSSA                    |
| 023         | MSSA                    |
| 030         | MSSA                    |
| 042         | MSSA                    |
| 042         | MSSA                    |
| 052         | MRSA                    |
| 053         | MRSA                    |
| 053         | MRSA                    |
| 055         | MSSA                    |
| 055         | MSSA                    |
| 058         | MSSA                    |
| 058         | MSSA                    |
| 058         | MSSA                    |
| 059         | MRSA                    |
| 059         | MRSA                    |
| 064         | MRSA                    |
| 072         | MSSA                    |
| 073         | MSSA                    |
| 073         | MSSA                    |
|             |                         |
| 076         | MRSA                    |
| 77R         | MSSA                    |
| 77R         | MSSA                    |
| 77R         | MSSA                    |
| 77R         | MSSA                    |
| 078         | MSSA                    |
| 078         | MSSA                    |
| 080         | MRSA                    |
| 081         | MRSA                    |
| 081         | MRSA                    |





|     |      |
|-----|------|
| 161 | MSSA |
| 161 | MSSA |
| 162 | MSSA |
| 162 | MSSA |
| 165 | MSSA |
| 169 | MRSA |
| 169 | MRSA |
| 169 | MRSA |
| 173 | MRSA |
| 179 | MSSA |
| 179 | MSSA |
| 179 | MSSA |
| 182 | MRSA |
| 182 | MRSA |
| 184 | MRSA |
| 184 | MRSA |
| 187 | MRSA |
| 201 | MSSA |
| 201 | MSSA |
| 201 | MSSA |
| 208 | MRSA |
| 210 | MRSA |
| 210 | MRSA |
| 210 | MRSA |
| 221 | MRSA |
| 223 | MRSA |
| 223 | MRSA |
| 224 | MSSA |
| 224 | MSSA |
| 225 | MRSA |
| 225 | MRSA |
| 225 | MRSA |
| 225 | MRSA |
| 225 | MRSA |
| 230 | MSSA |
| 233 | MSSA |
| 233 | MSSA |
| 235 | MSSA |
| 235 | MSSA |
| 236 | MSSA |
| 238 | MRSA |
| 238 | MRSA |
| 238 | MRSA |
| 238 | MRSA |
| 242 | MRSA |
| 242 | MRSA |
| 243 | MRSA |
| 247 | MSSA |

|     |      |
|-----|------|
| 247 | MSSA |
| 250 | MRSA |
| 250 | MRSA |
